# Supplementary material for: Synthesis of glucose derivatives modified at the 4-OH as potential chain-terminators of cellulose biosynthesis; herbicidal activity of simple monosaccharide derivatives
Source: Royal Society of Chemistry journal article supplement (doi:10.1039/b820830a), 2009-01-01

## SUPPORTING INFORMATION

### **Synthesis of glucose derivatives modified at the 4-OH as potential chain-terminators of cellulose biosynthesis; herbicidal activity of simple monosaccharide derivatives**

Emma van Dijkum,<sup>a</sup> Ramona Danac,<sup>a</sup> David J. Hughes,<sup>b</sup> Richard Wood,<sup>b</sup> Anne Rees,<sup>b</sup>  
Brendan L. Wilkinson<sup>a</sup> and Antony J. Fairbanks<sup>c,\*</sup>

<sup>a</sup> *Department of Chemistry, Chemistry Research Laboratory, University of Oxford, Mansfield Road, Oxford, OX1 3TA, UK*

<sup>b</sup> *Syngenta Limited, Jealott's Hill International Research Centre, Bracknell, Berkshire RG42 6EY, UK*

<sup>c</sup> *Department of Chemistry, University of Canterbury, Private Bag 4800, Christchurch, New Zealand*

e-mail: antony.fairbanks@canterbury.ac.nz

## Compound 6a

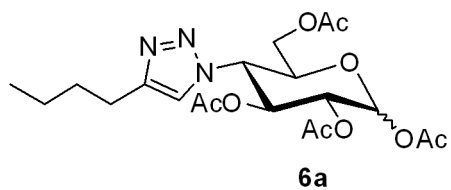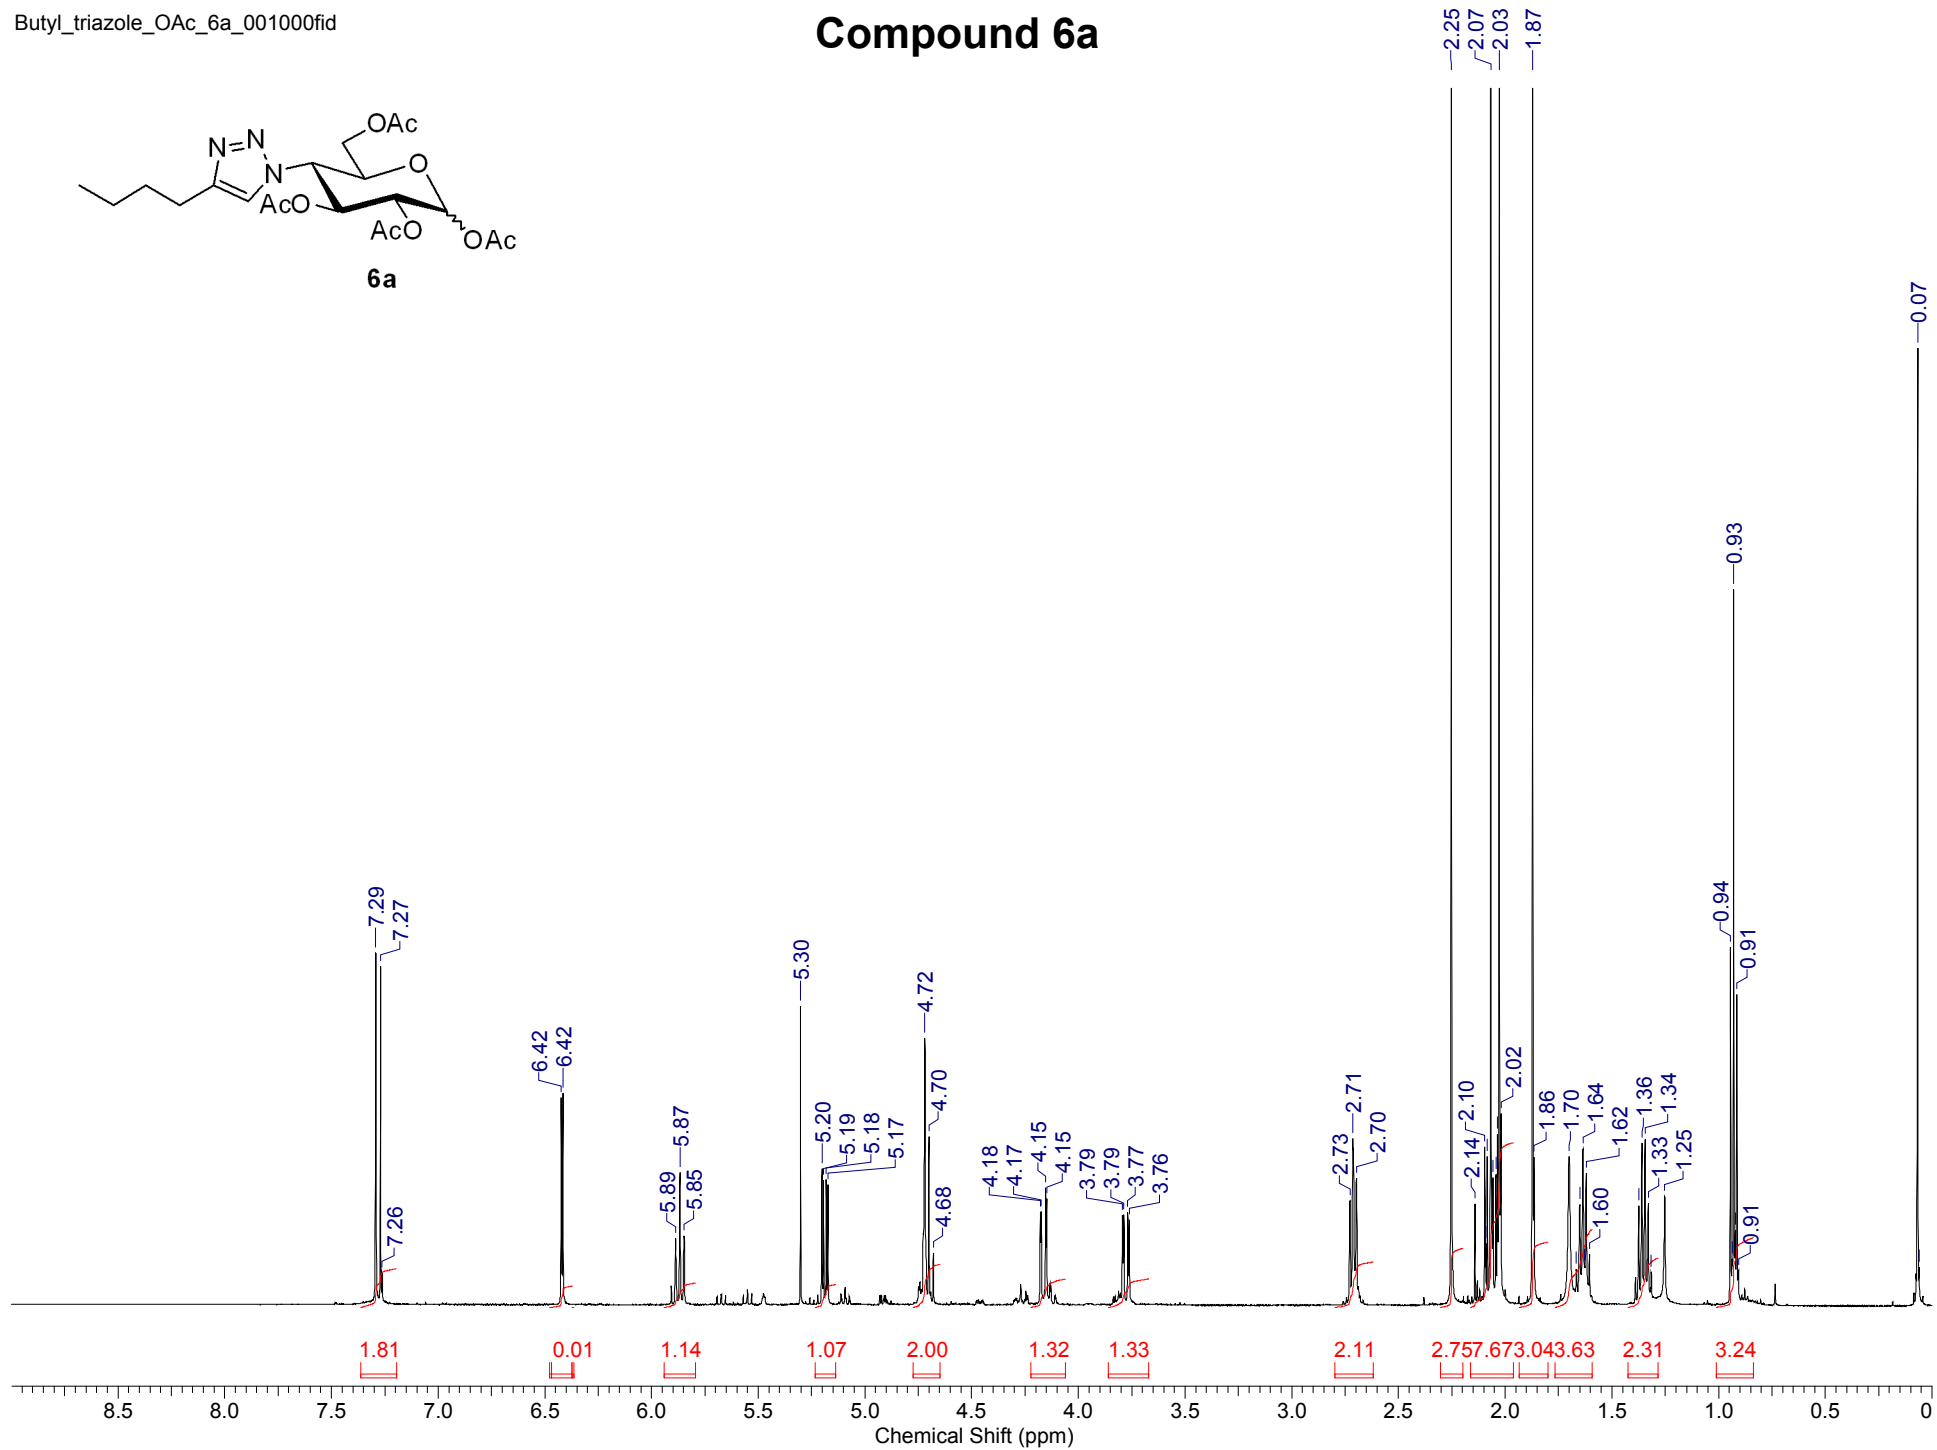

# Compound 6a

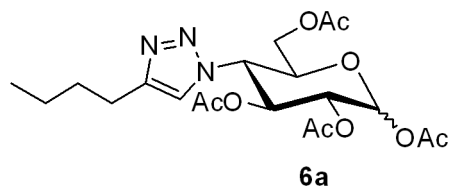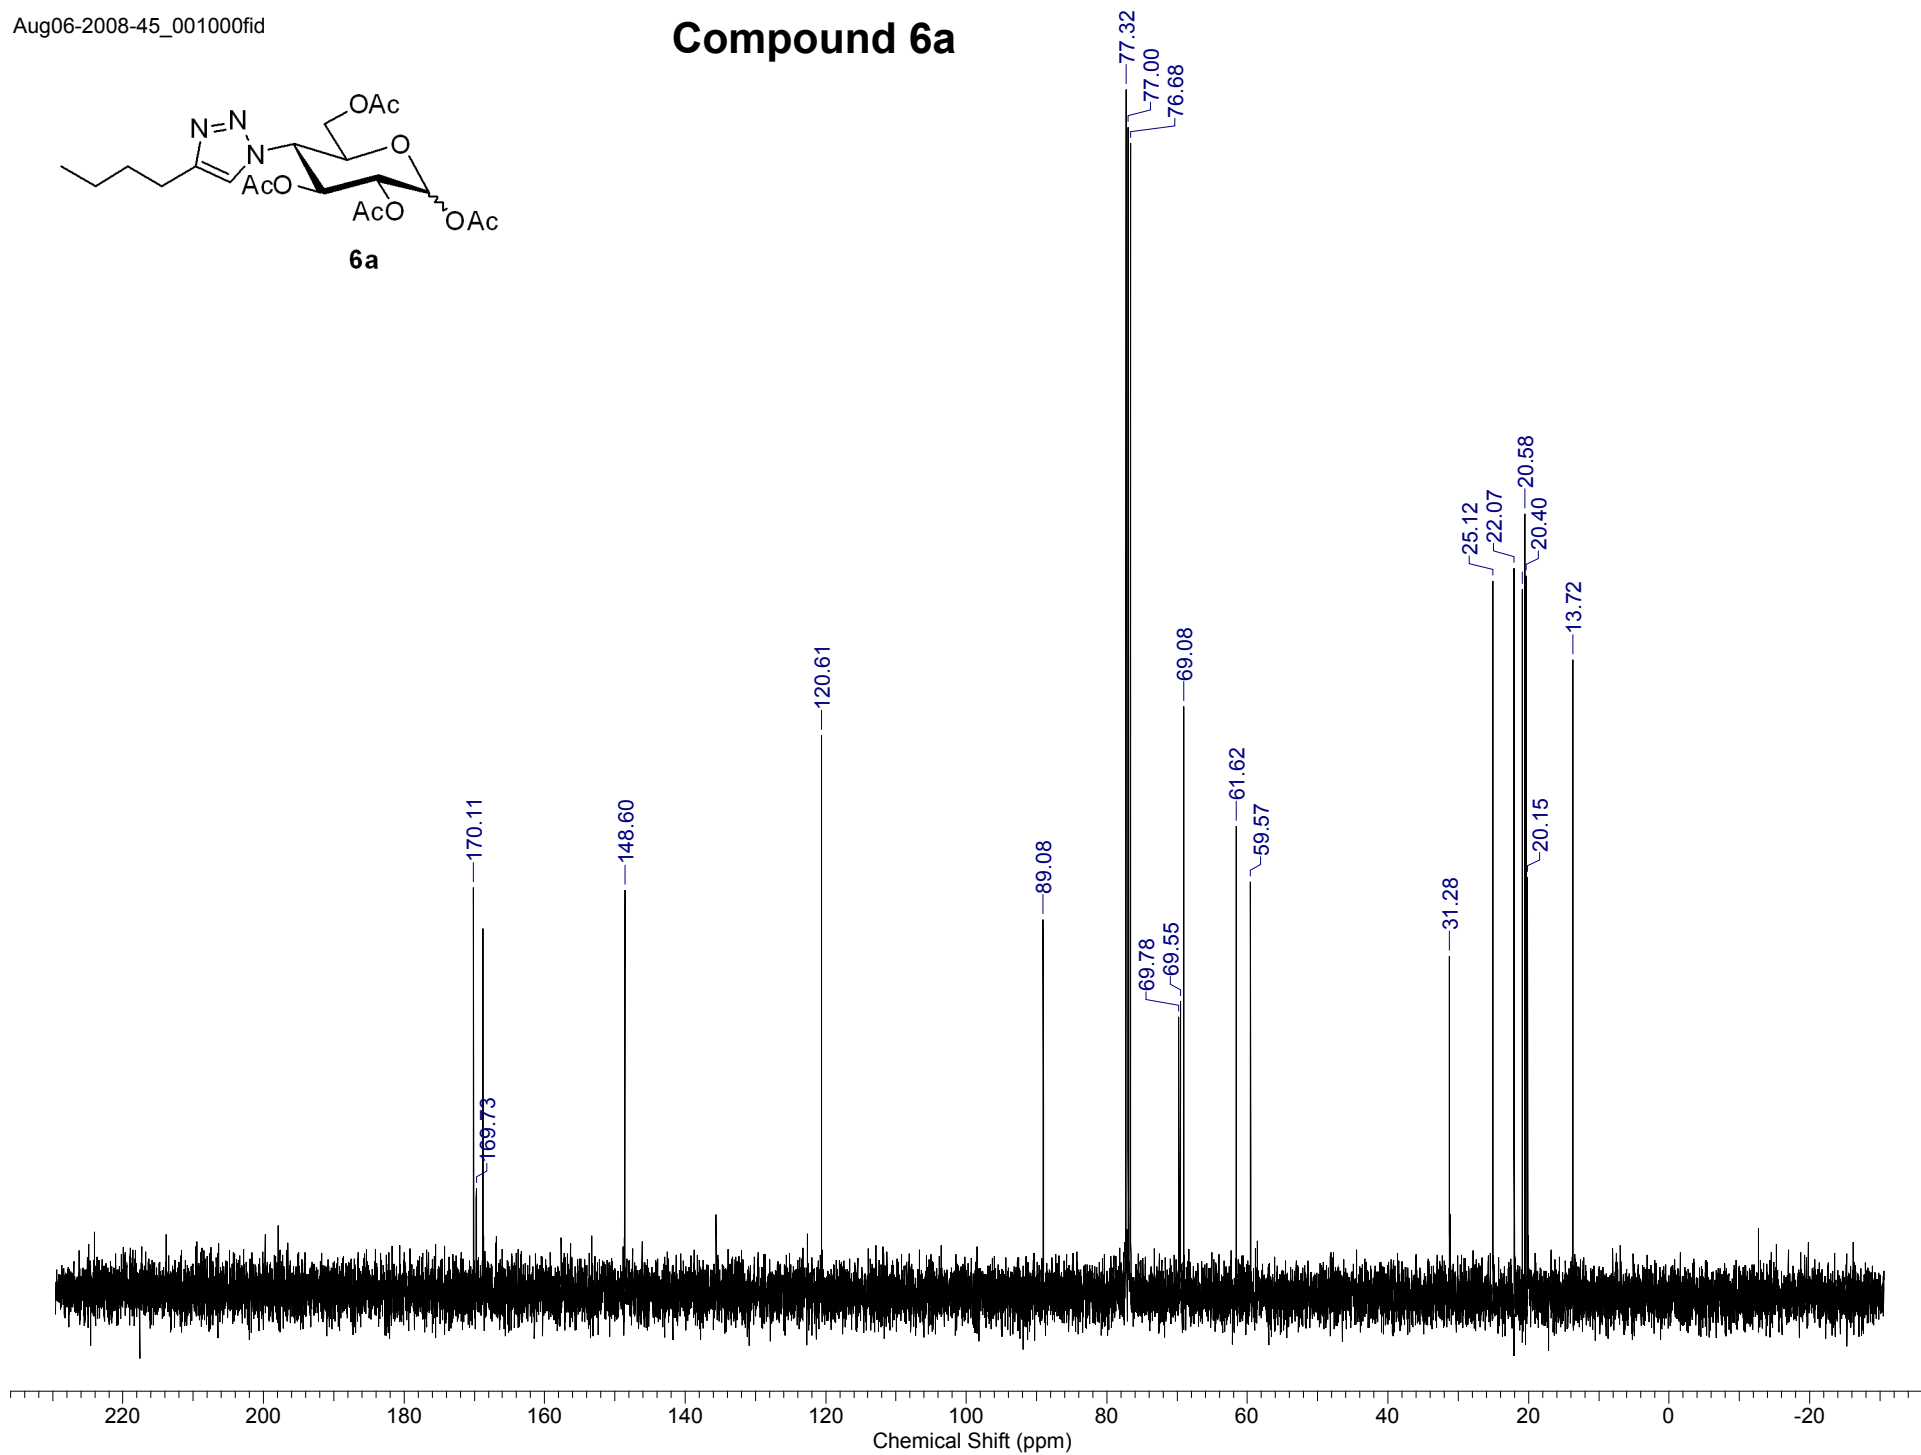

## Compound 6a

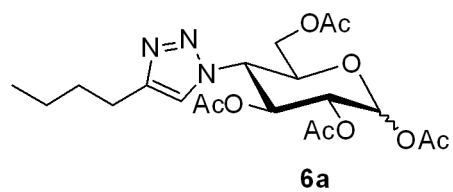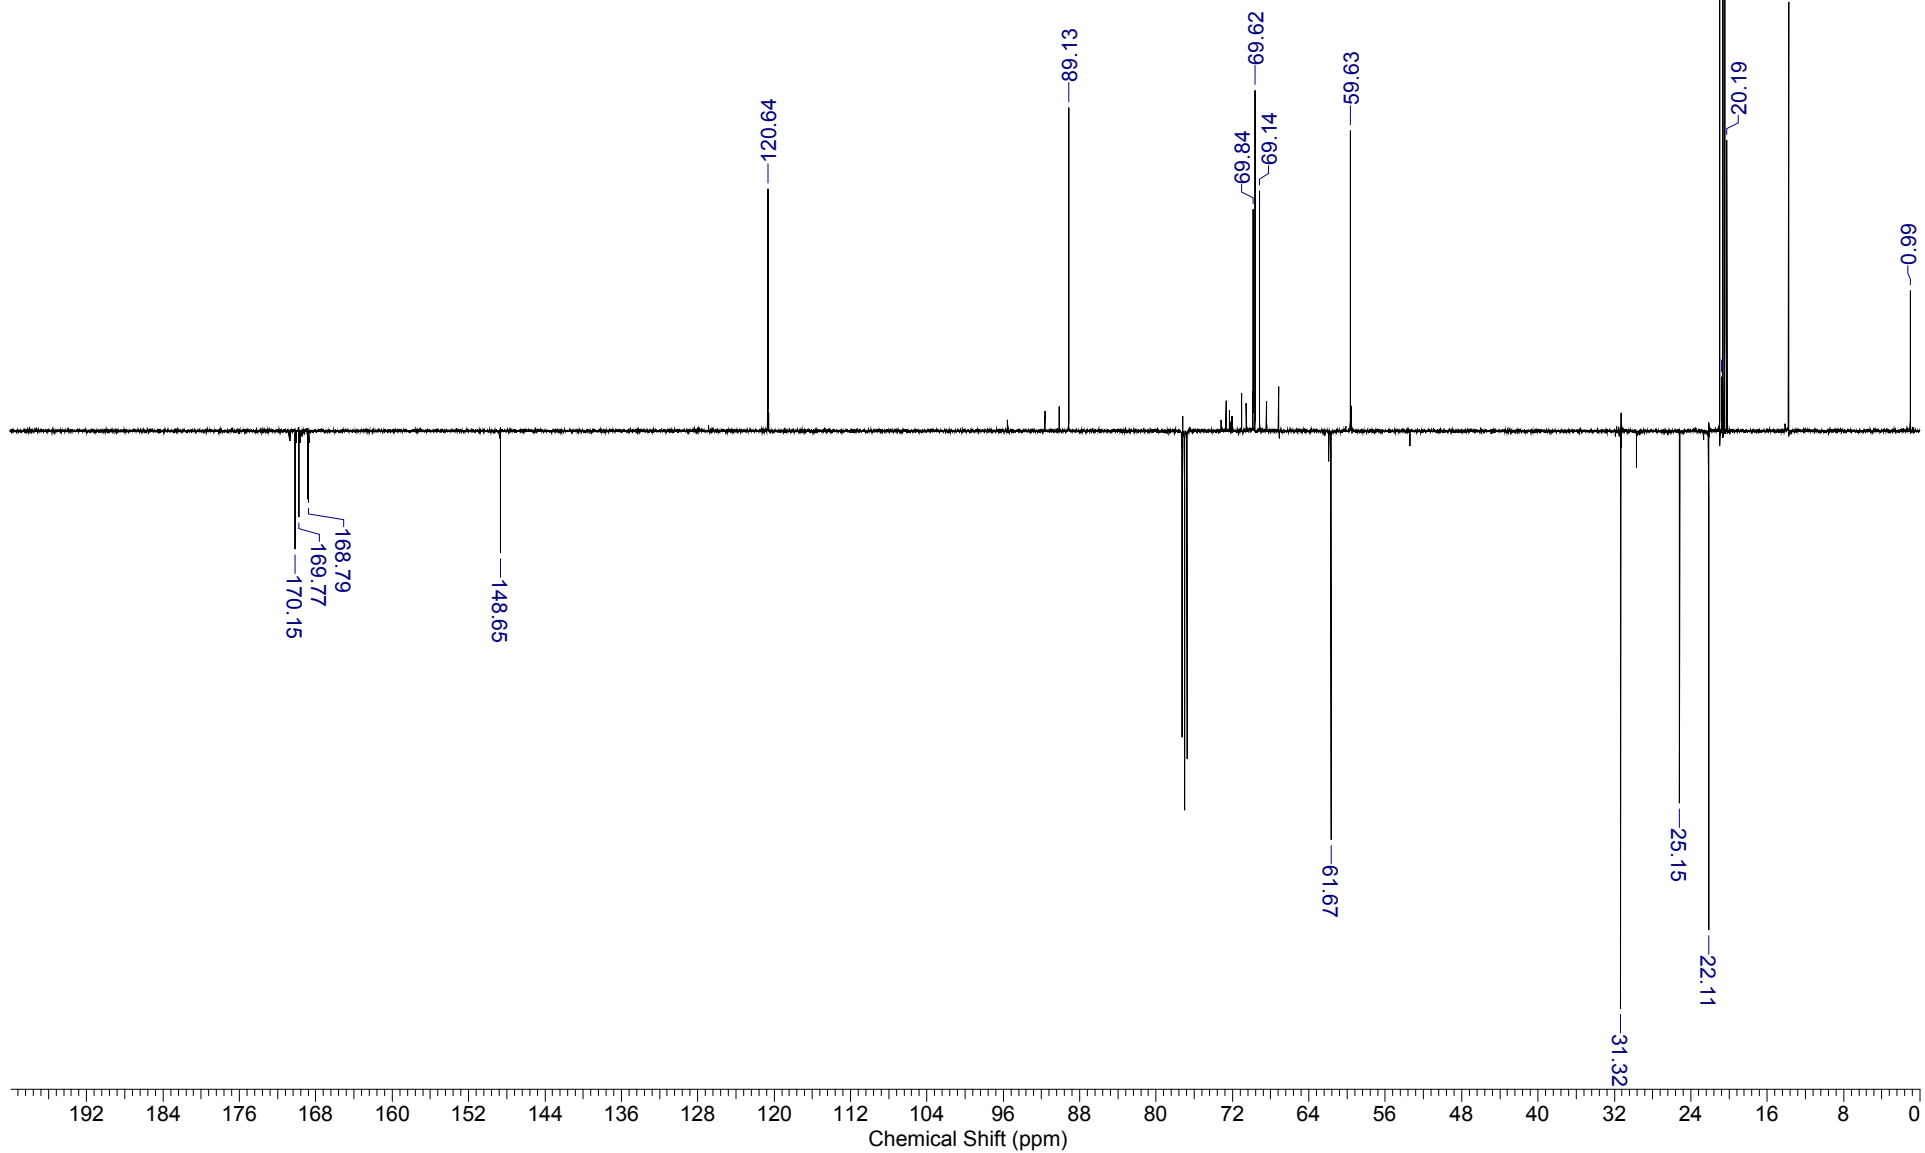

6b.esp

# Compound 6b

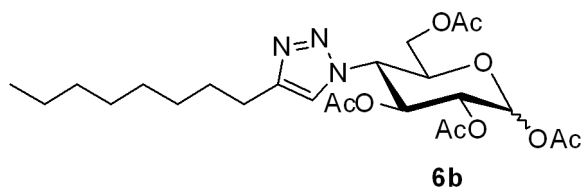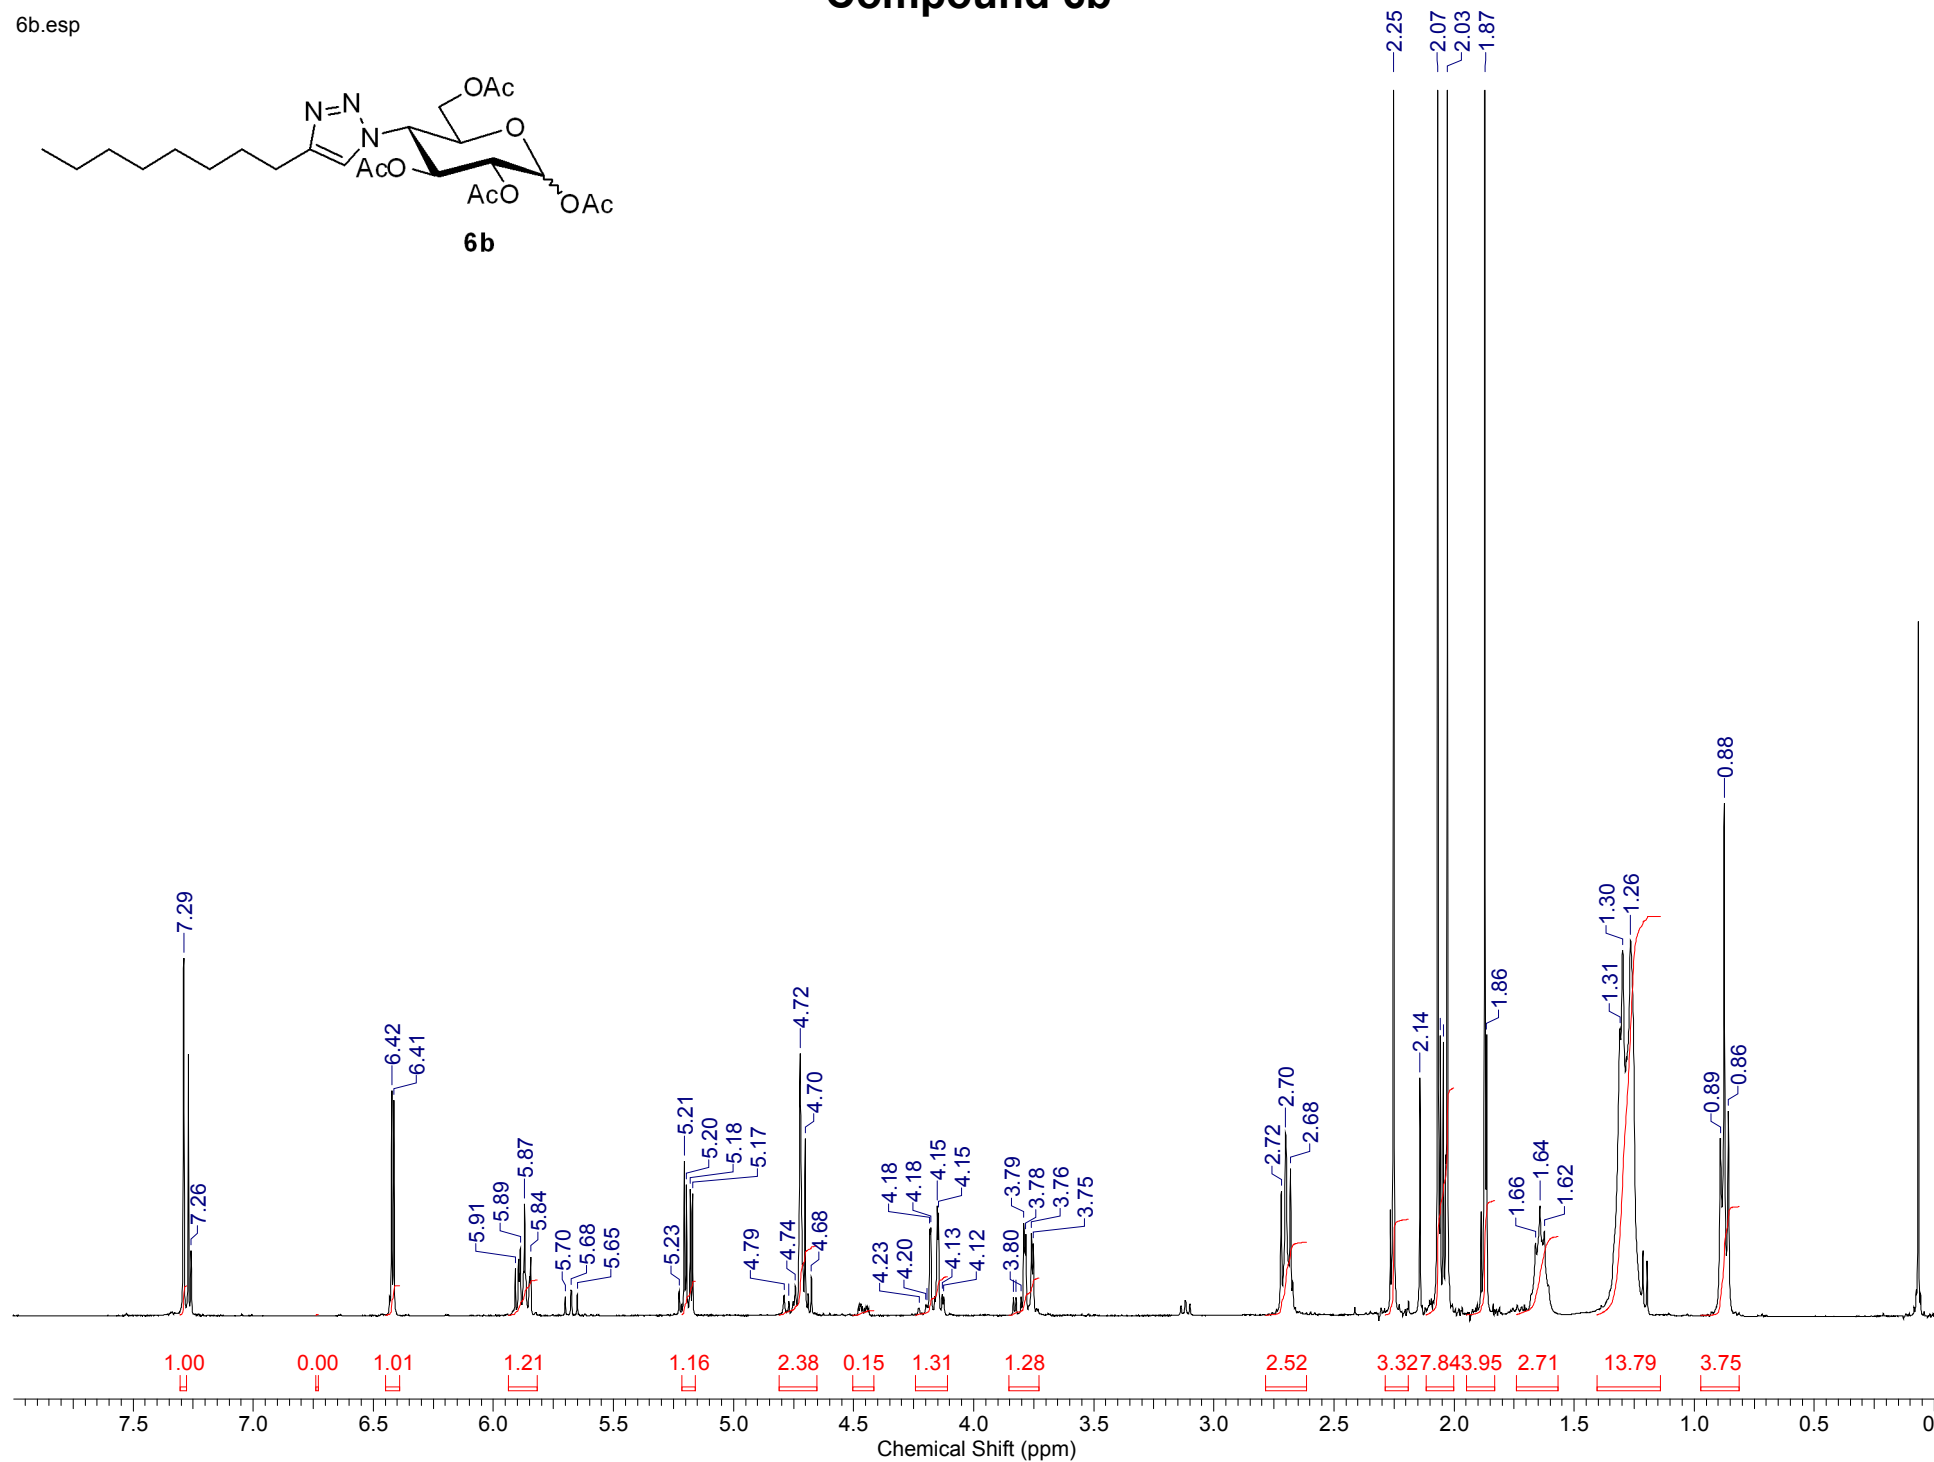

## Compound 6b

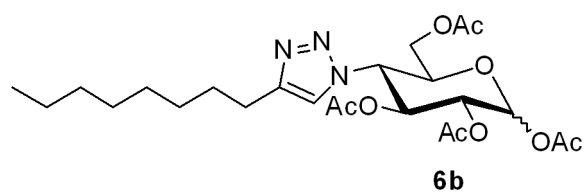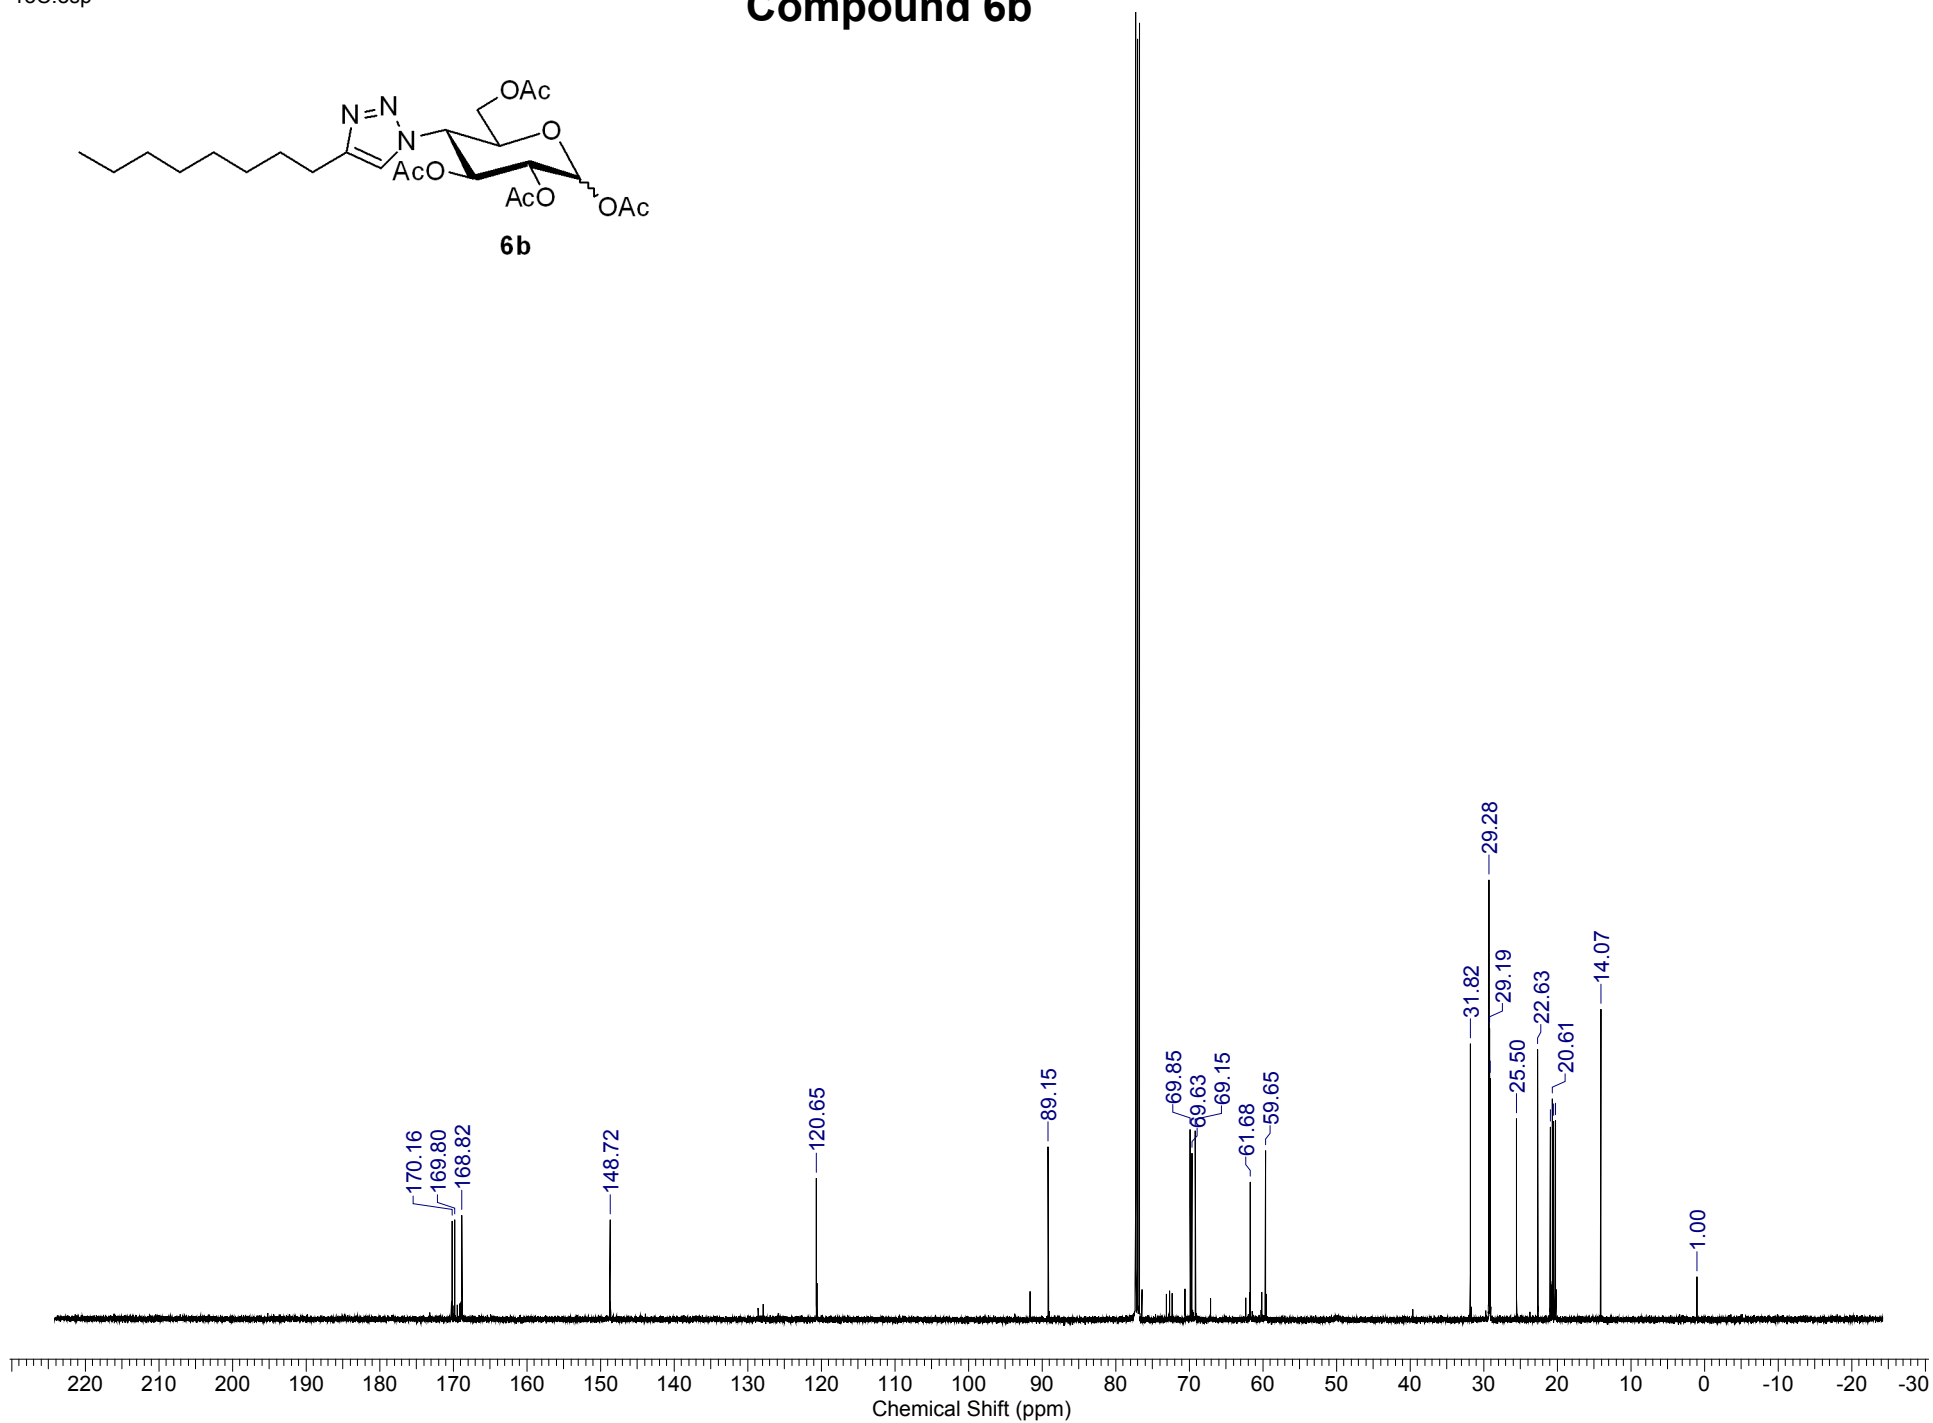

## Compound 6c

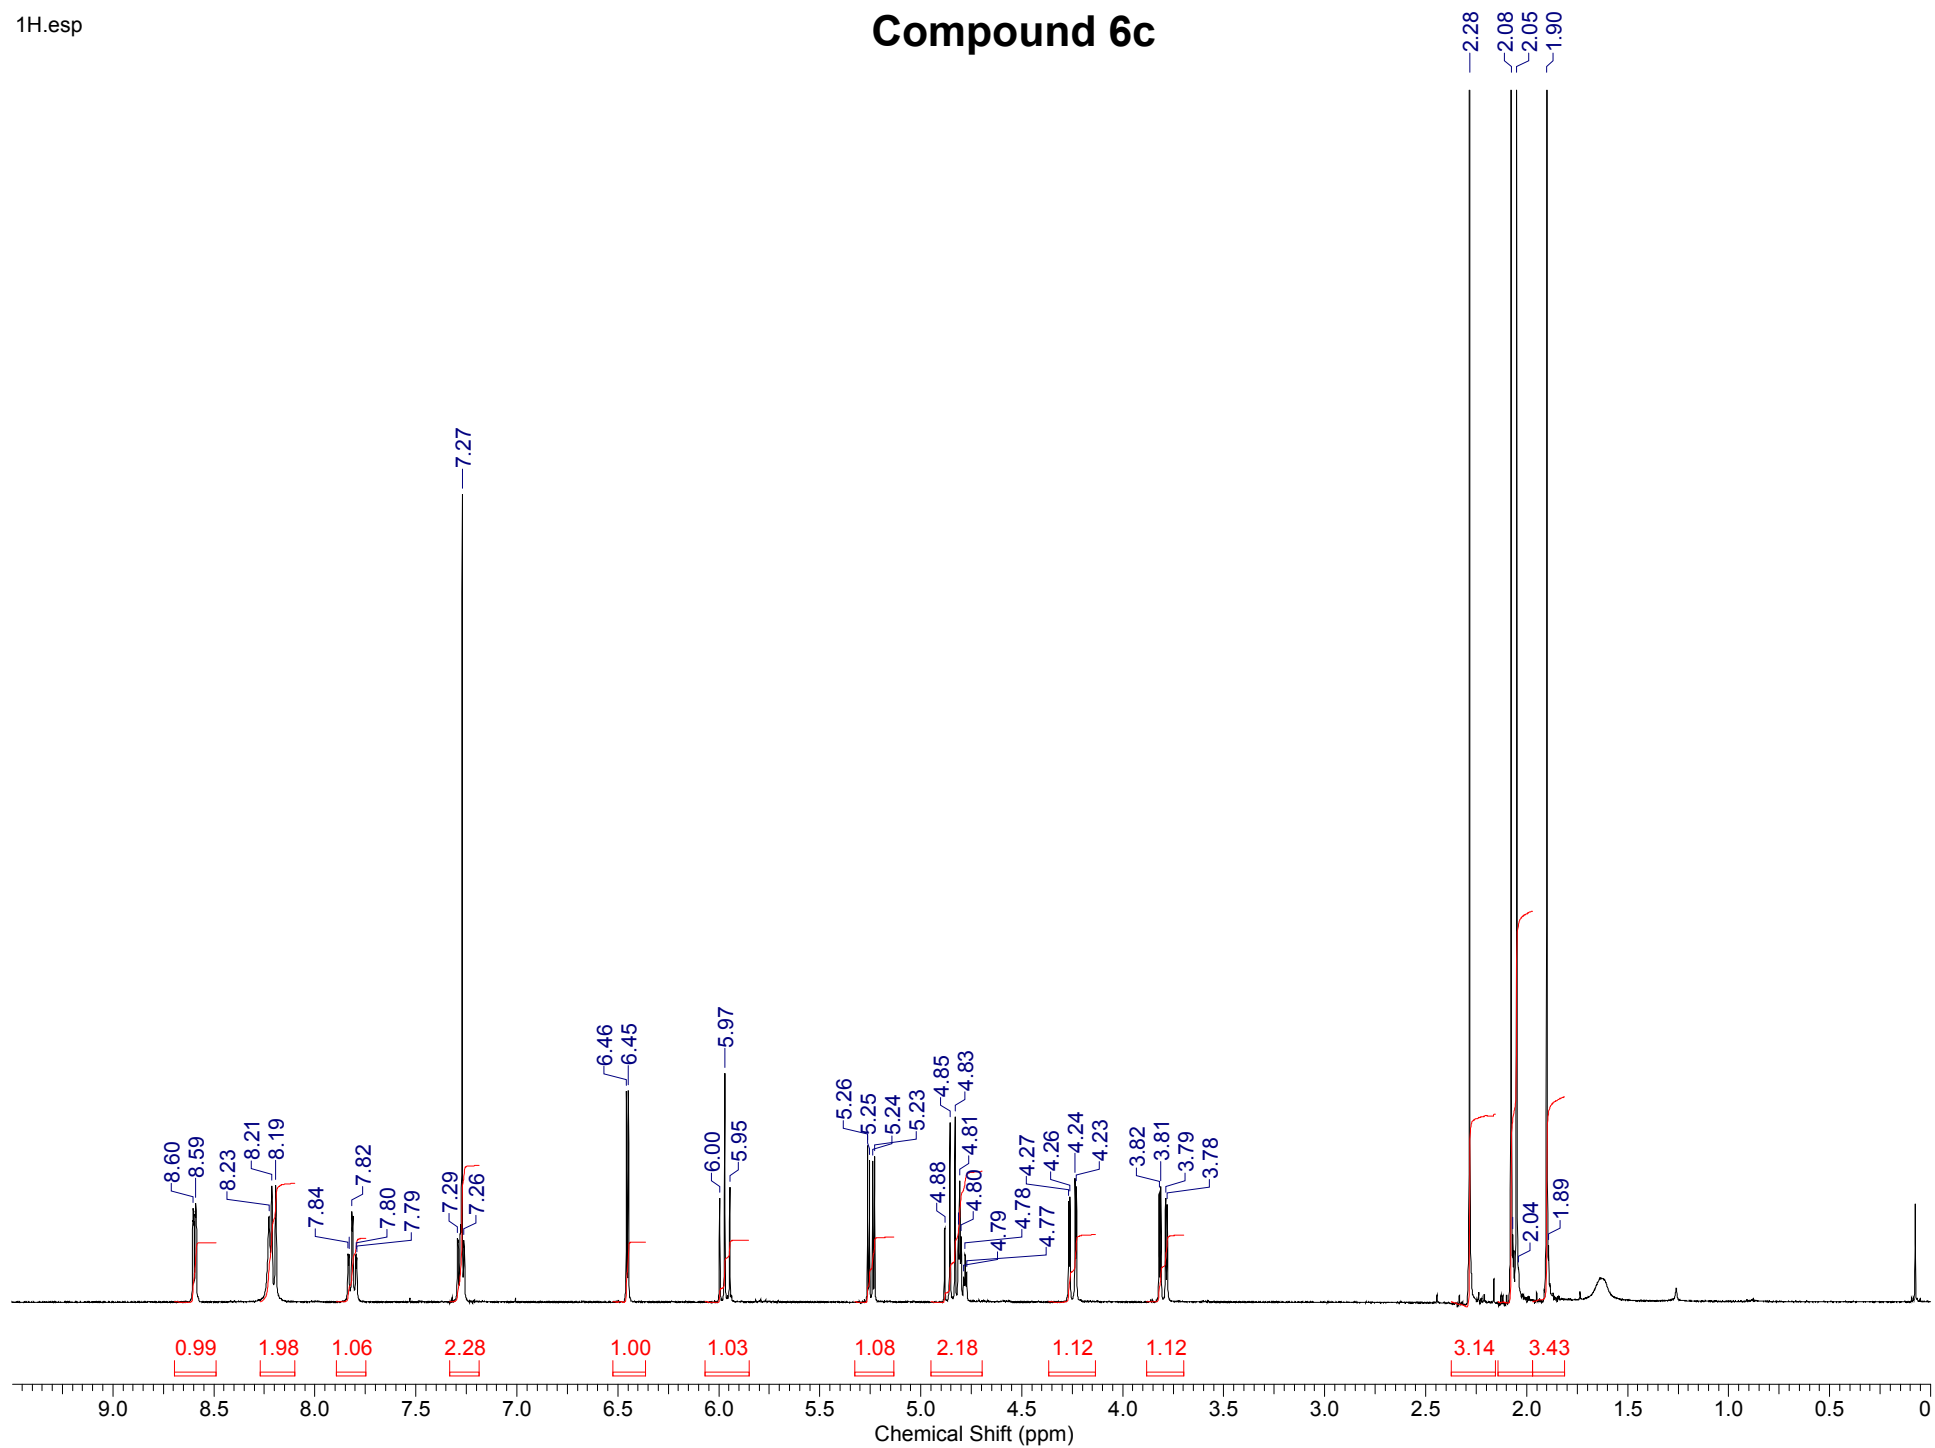

## Compound 6c

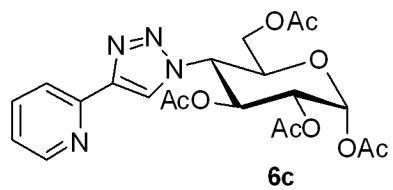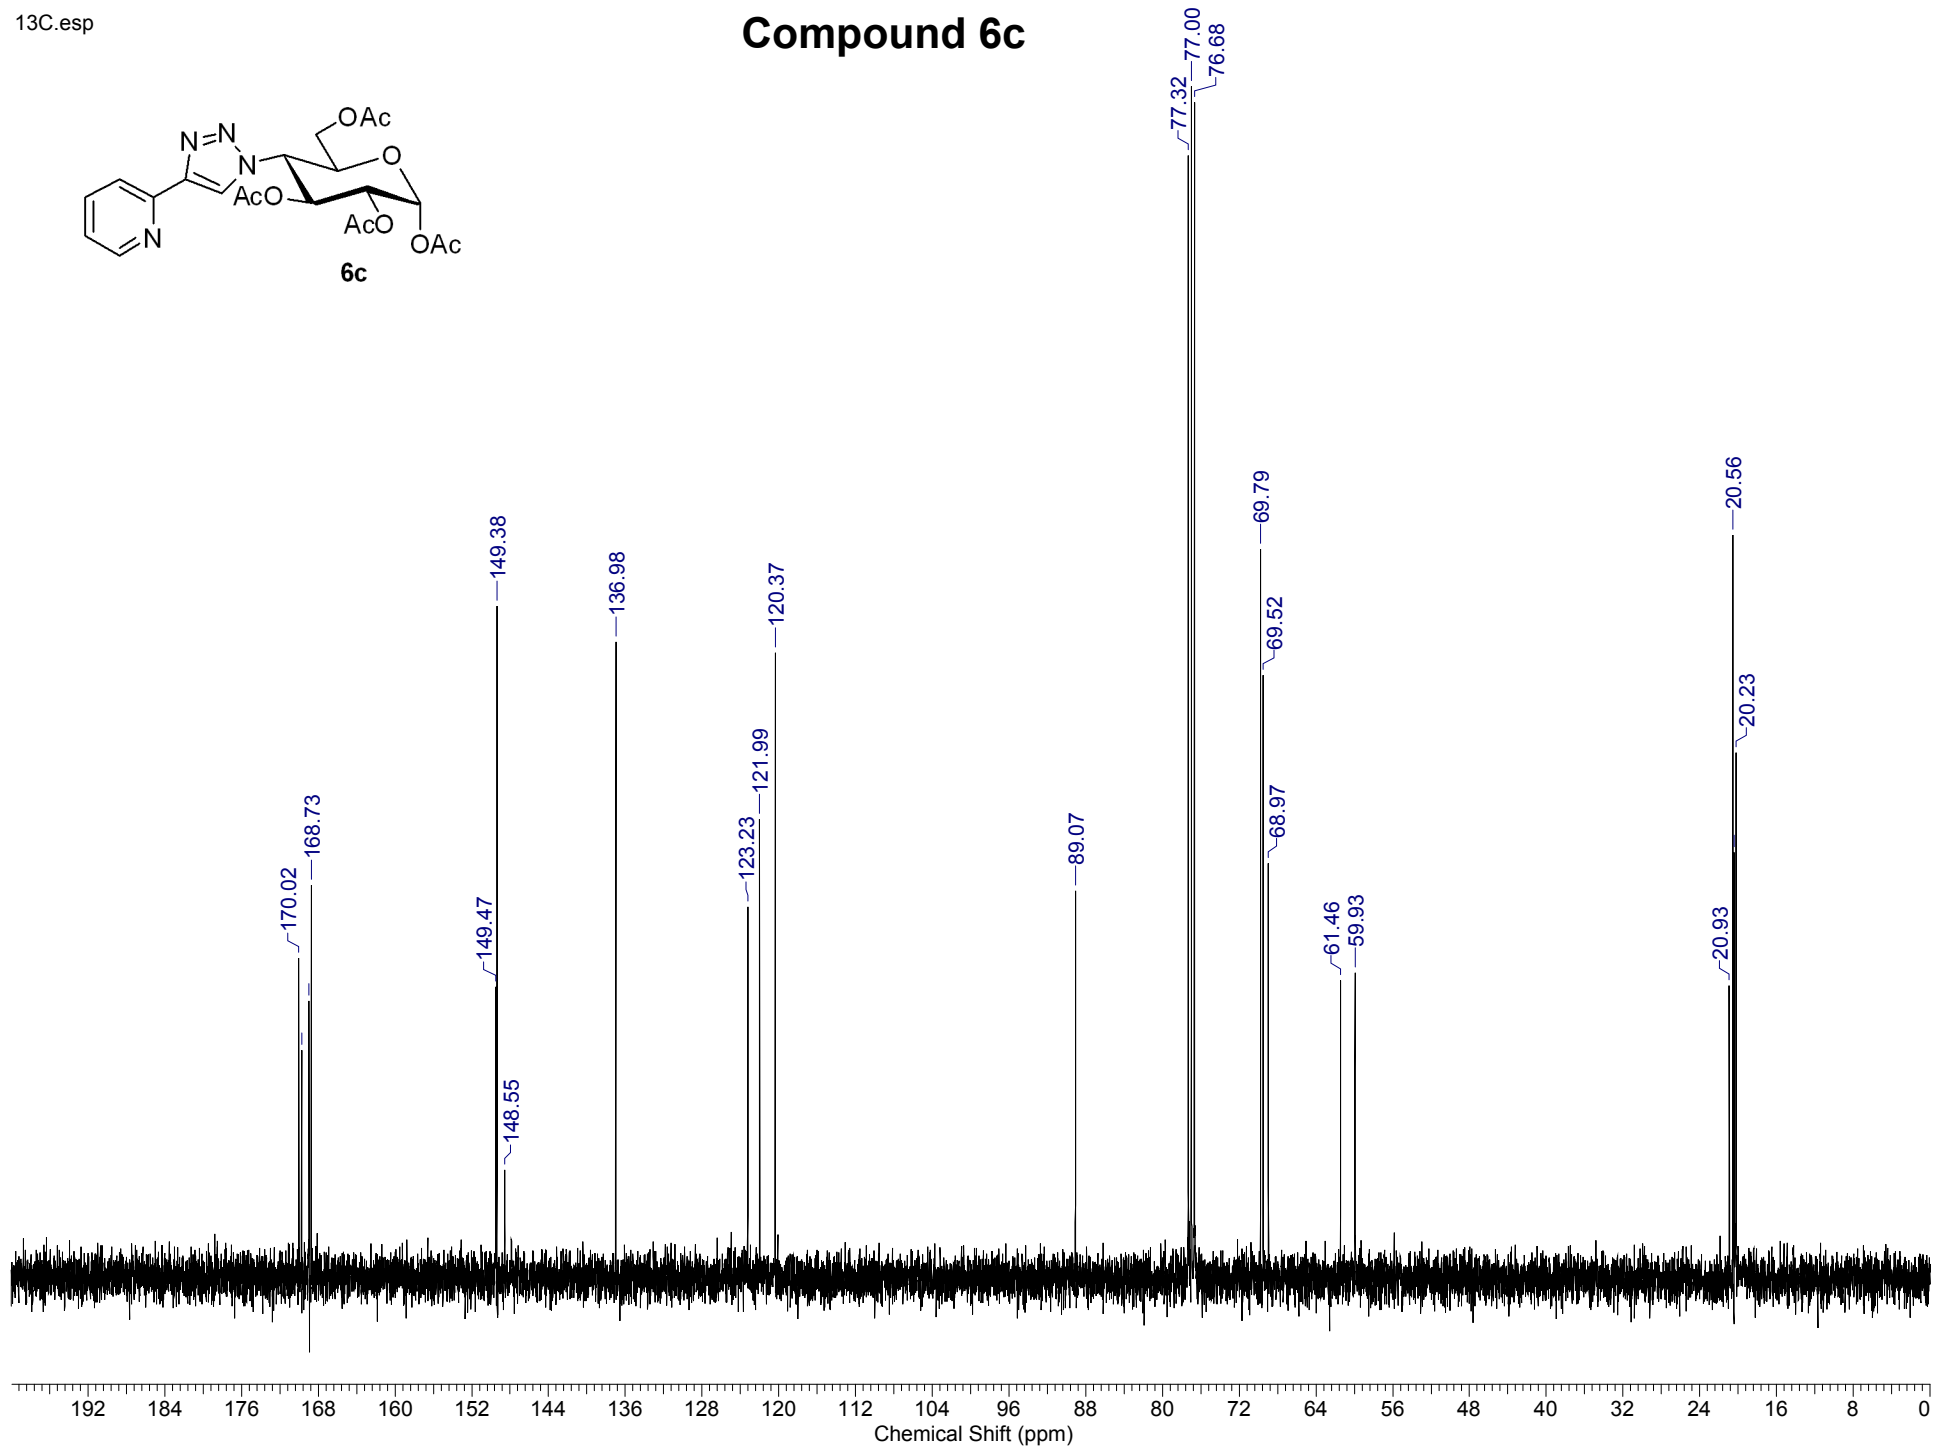



# Compound 6d

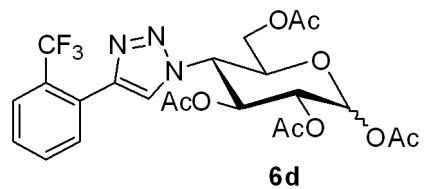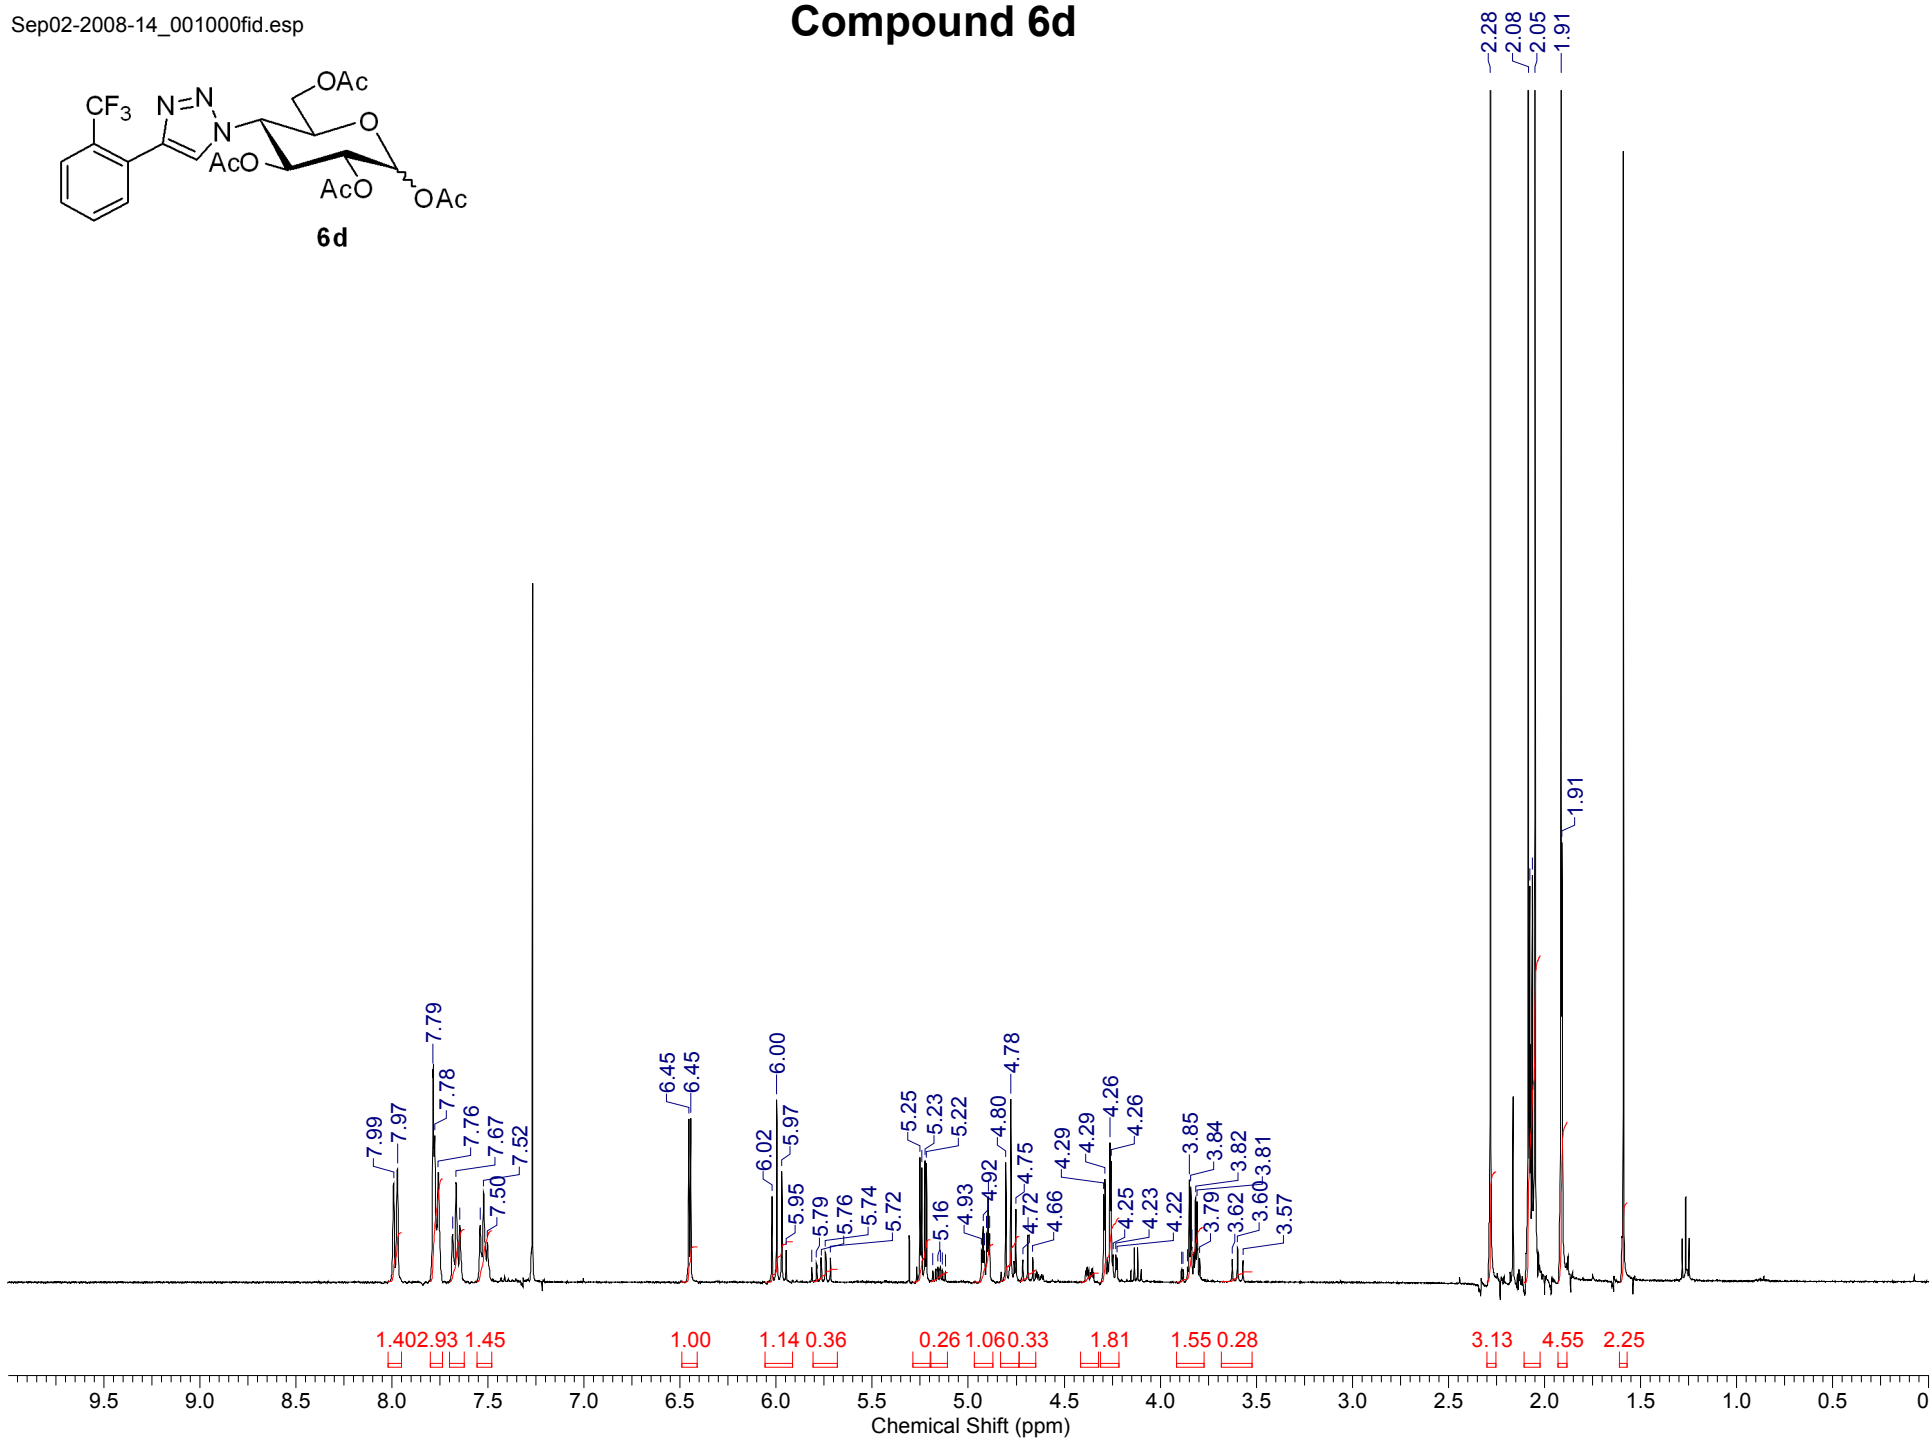

## Compound 6d

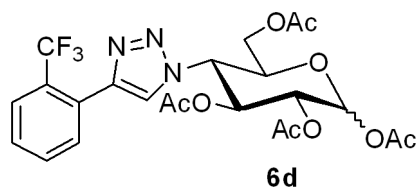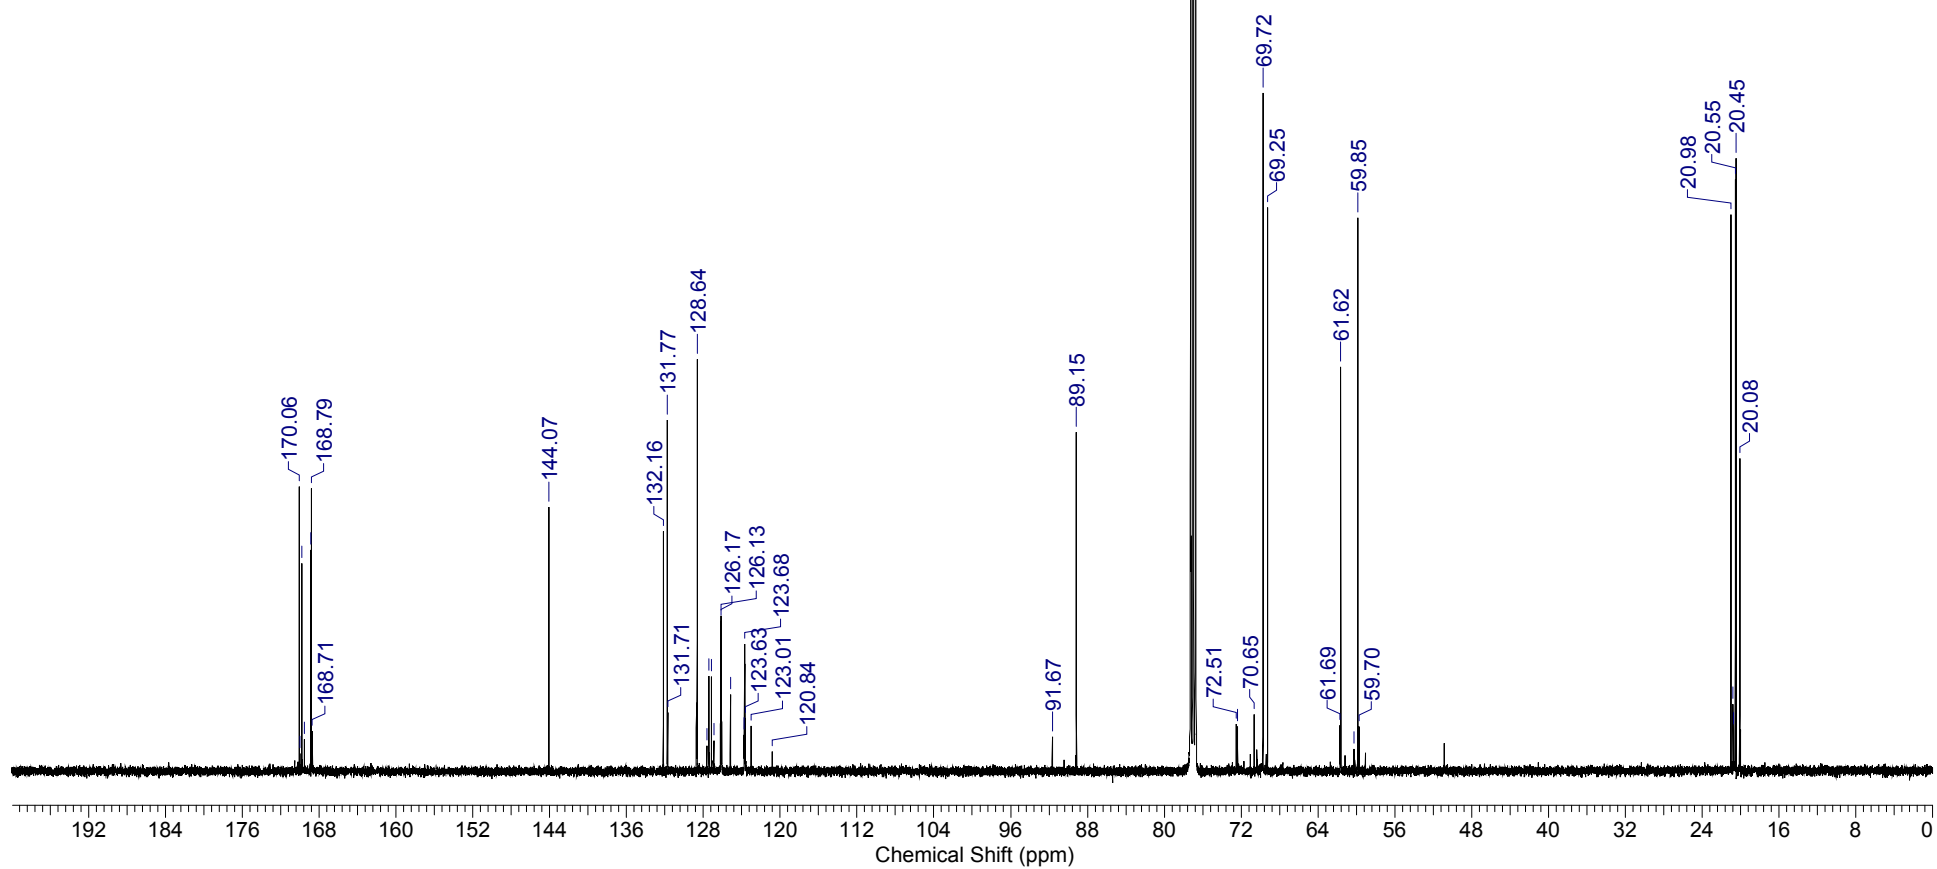

# Compound 7a

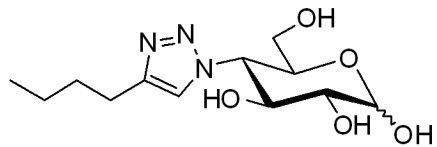

7a

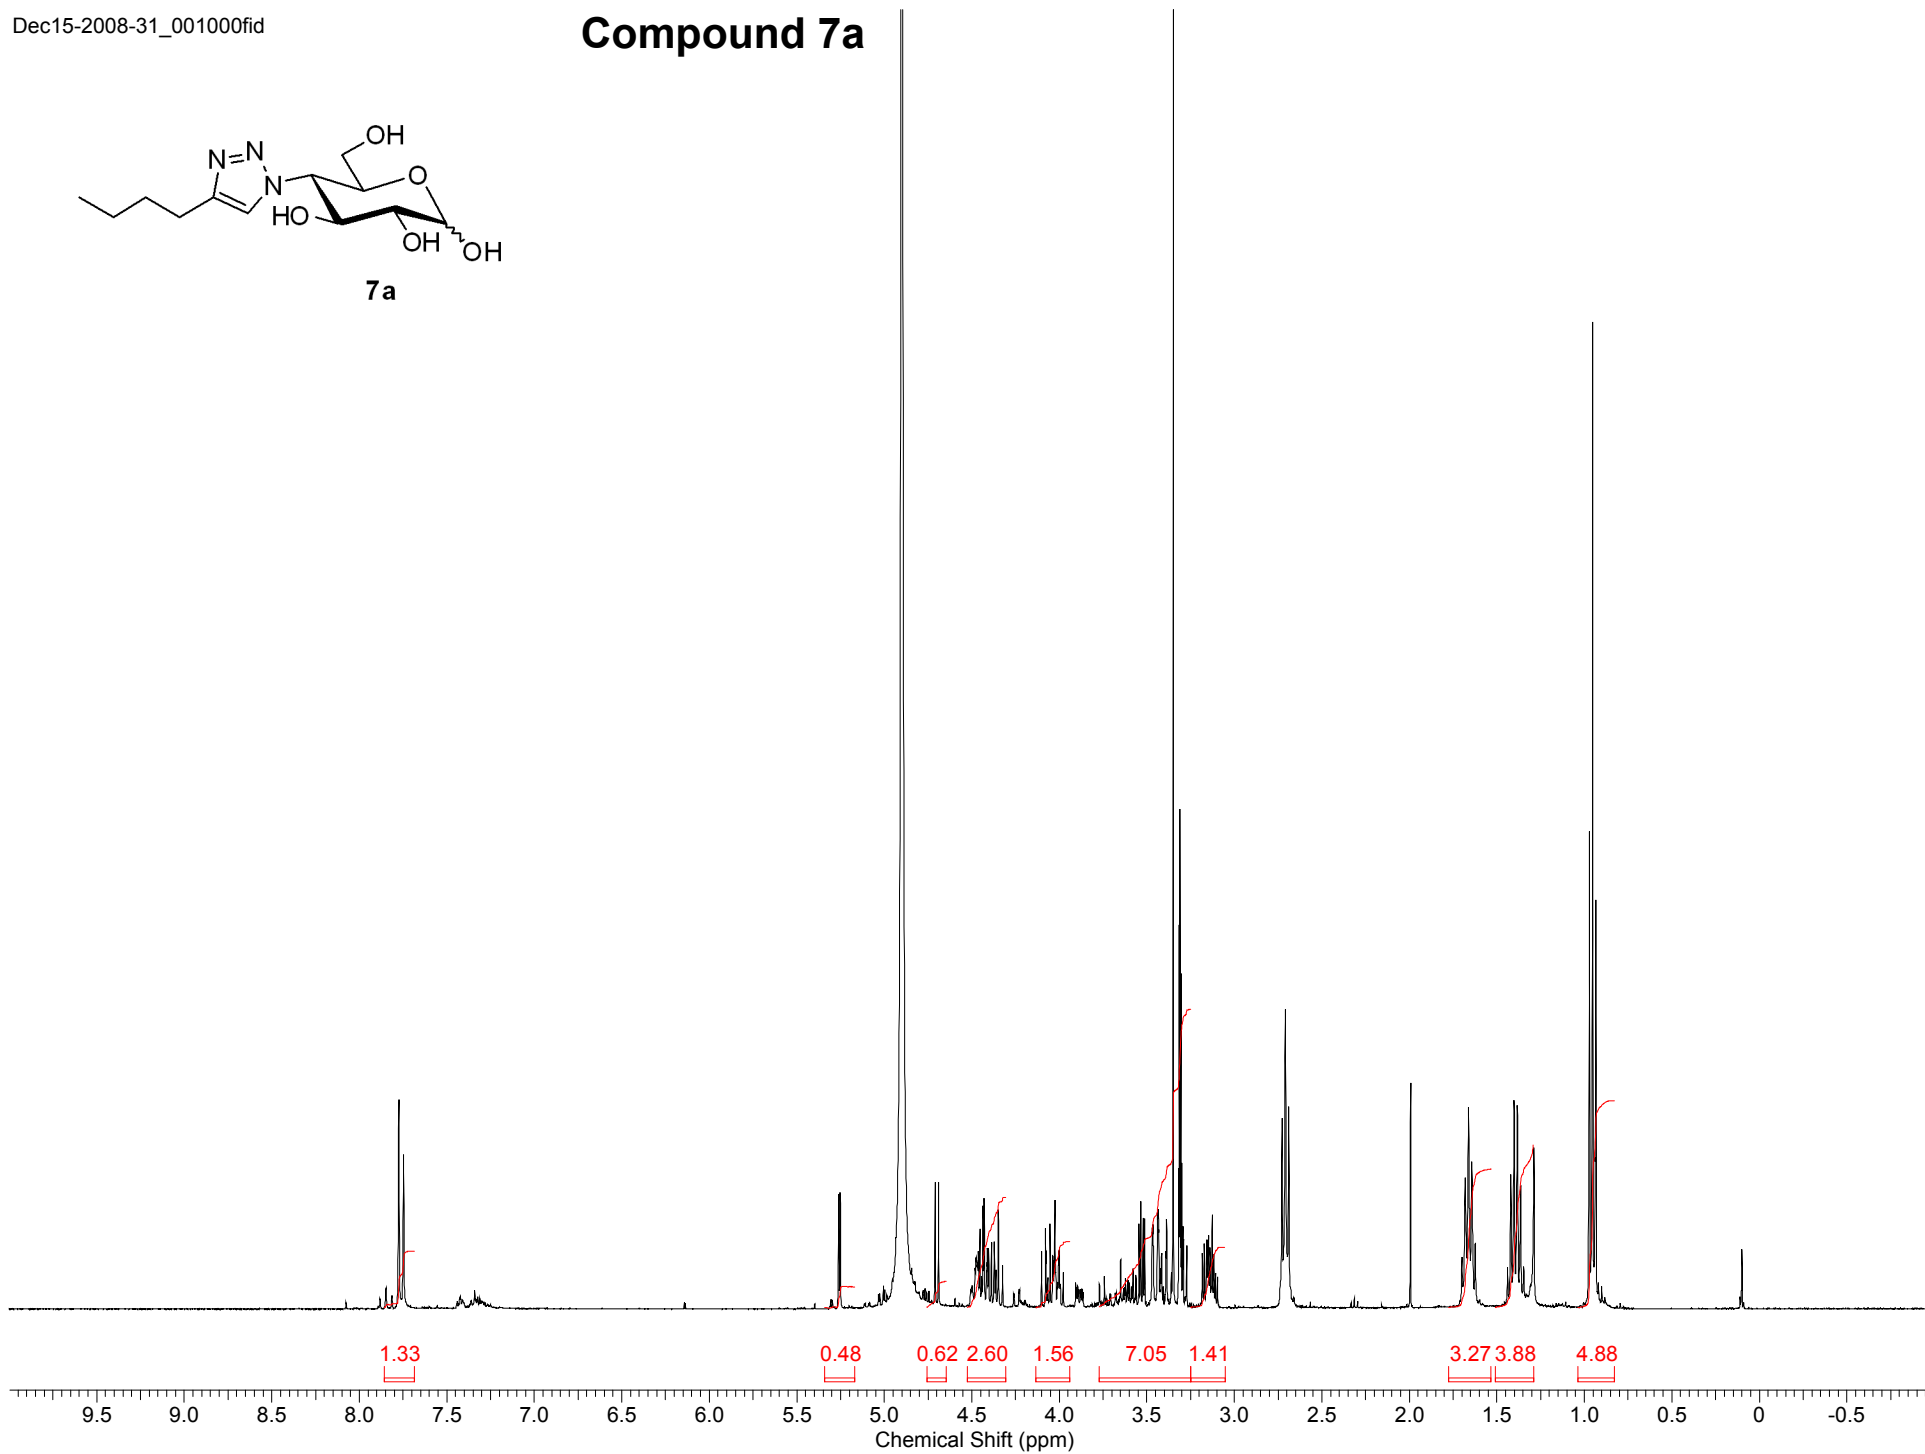

## Compound 7b

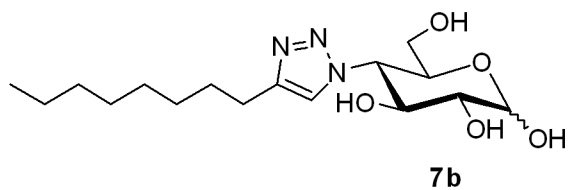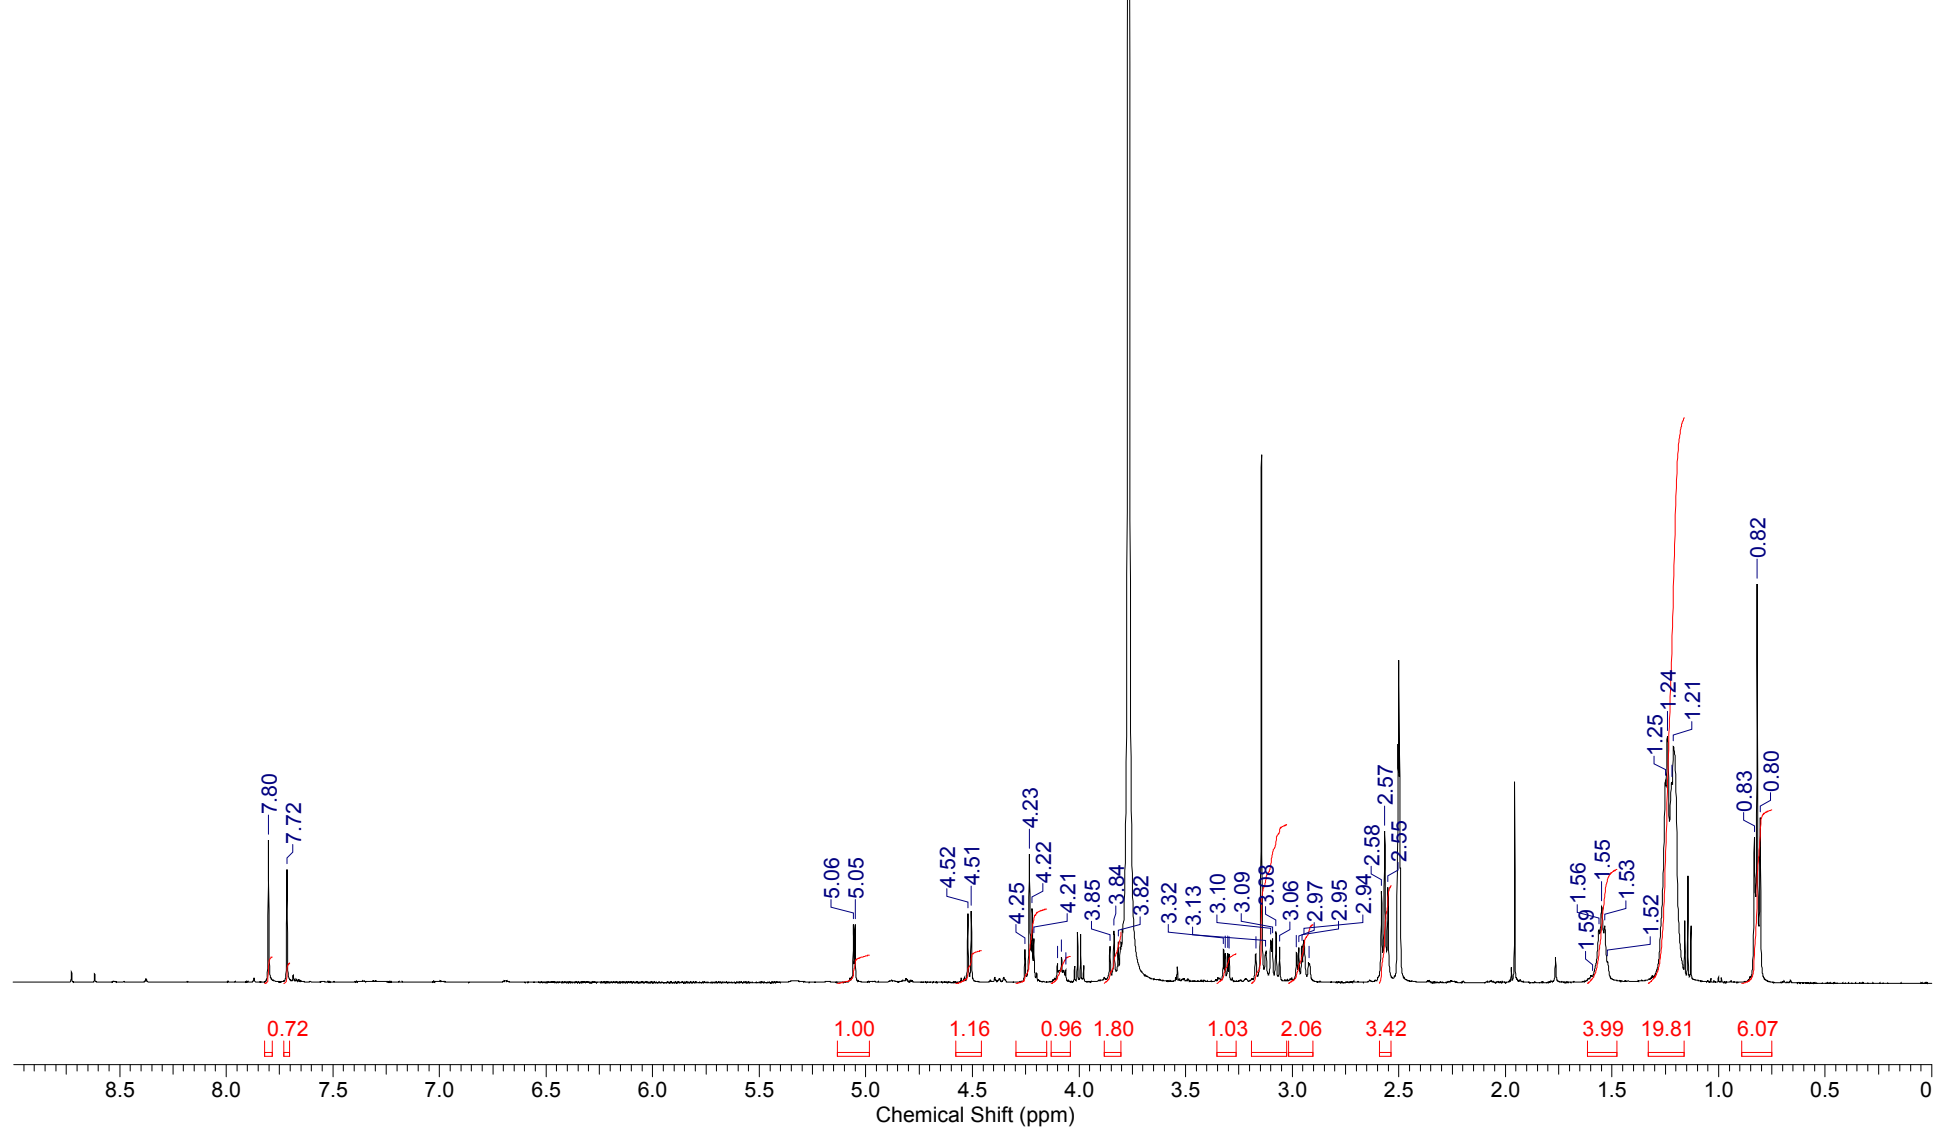

## Compound 7b

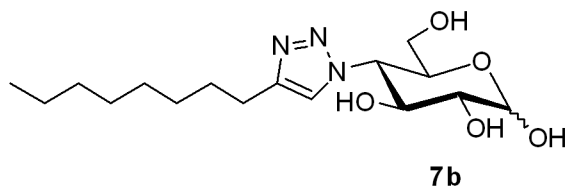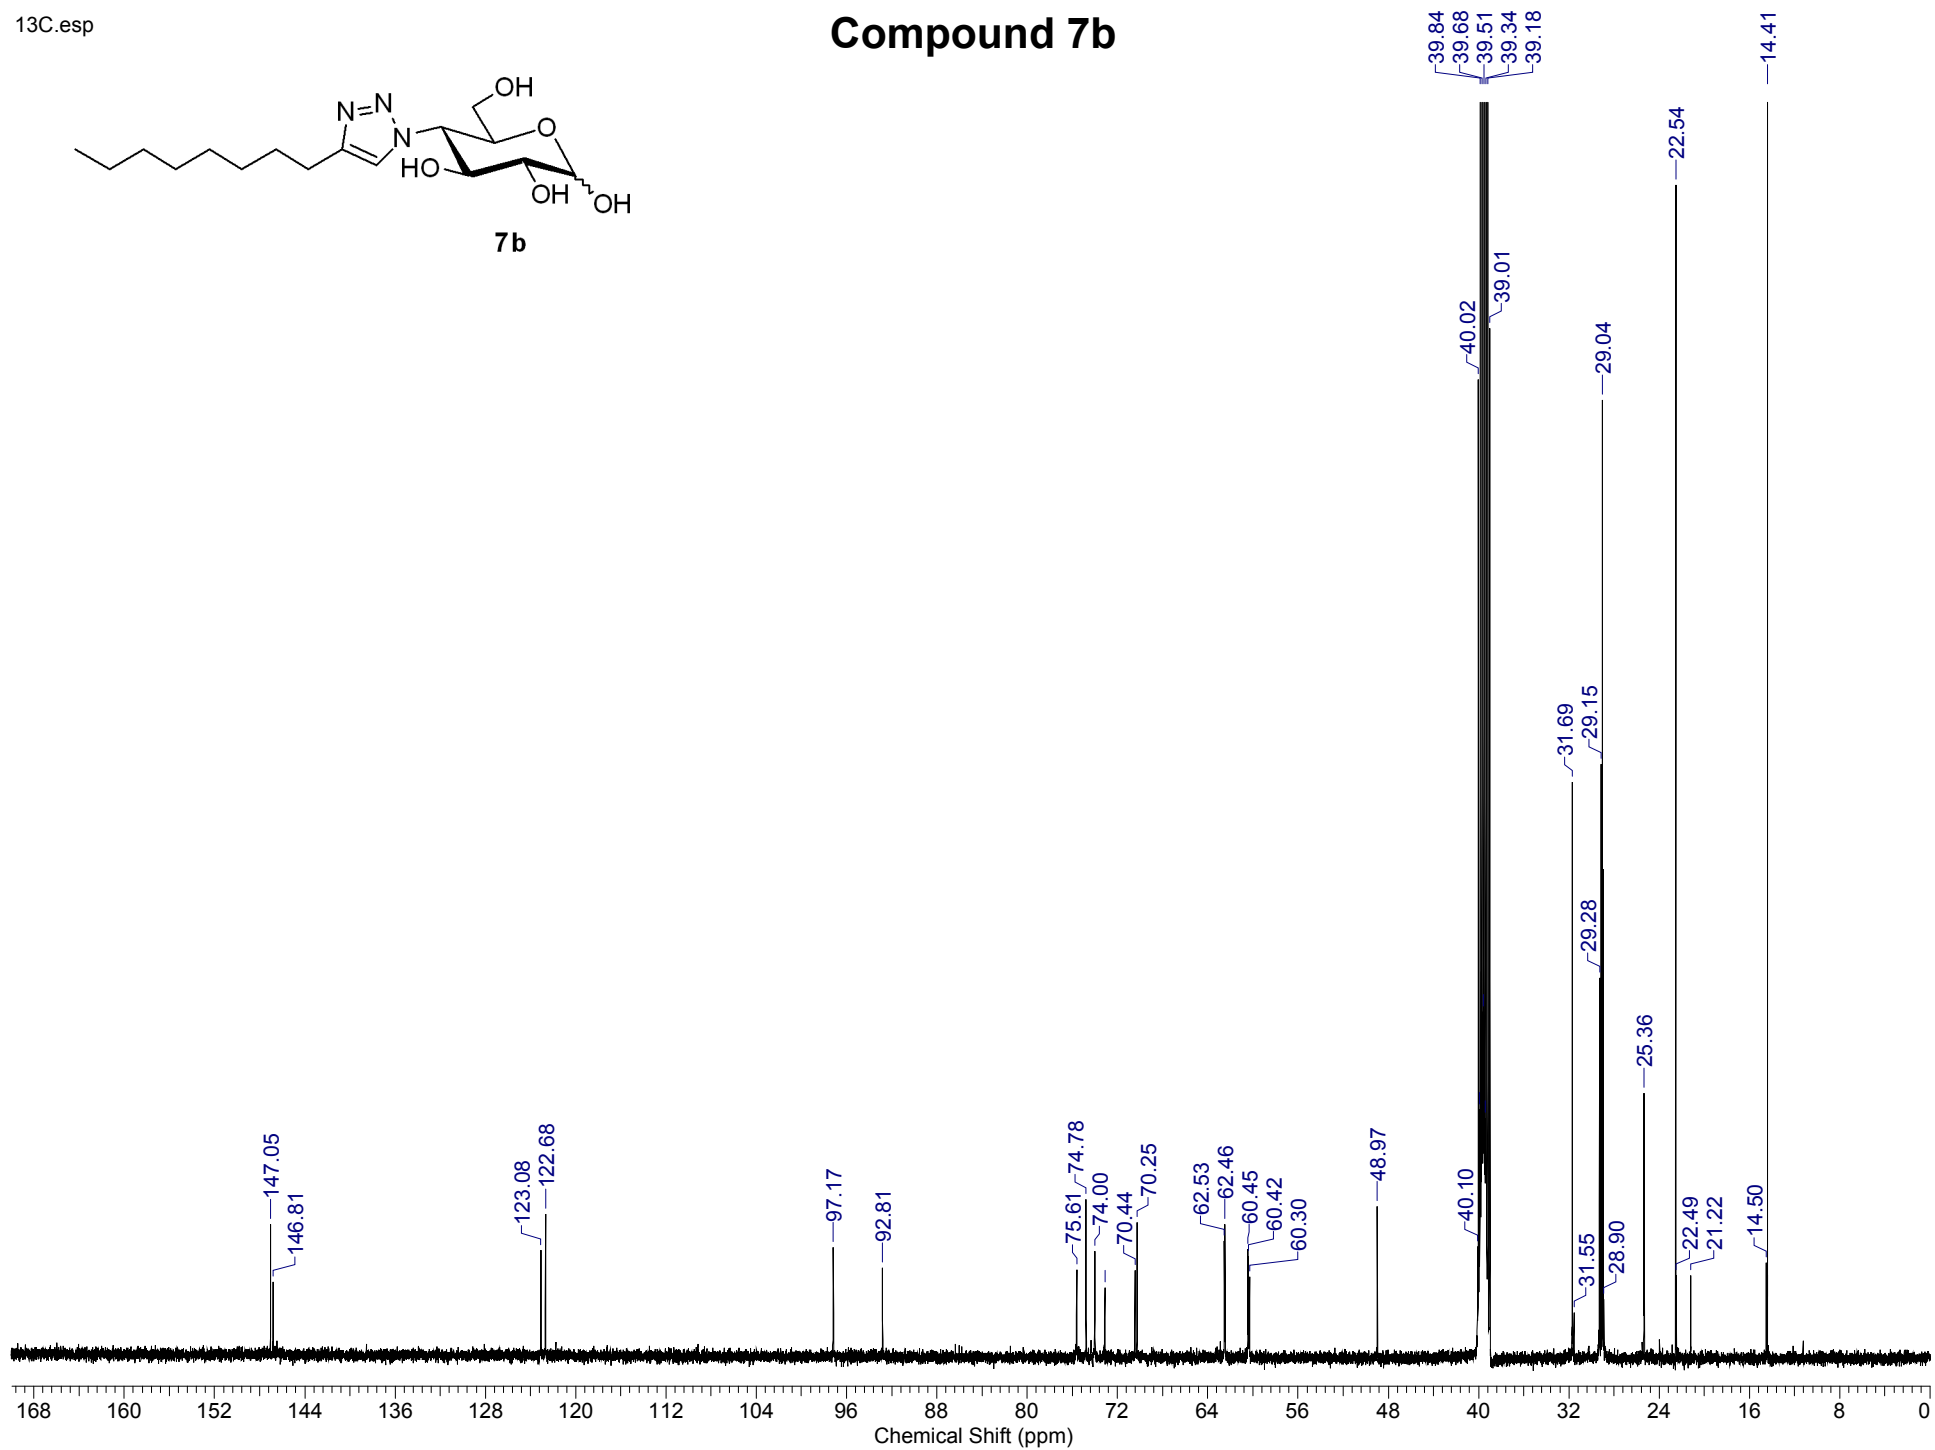

1H.esp

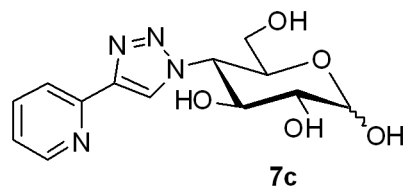

# Compound 7c

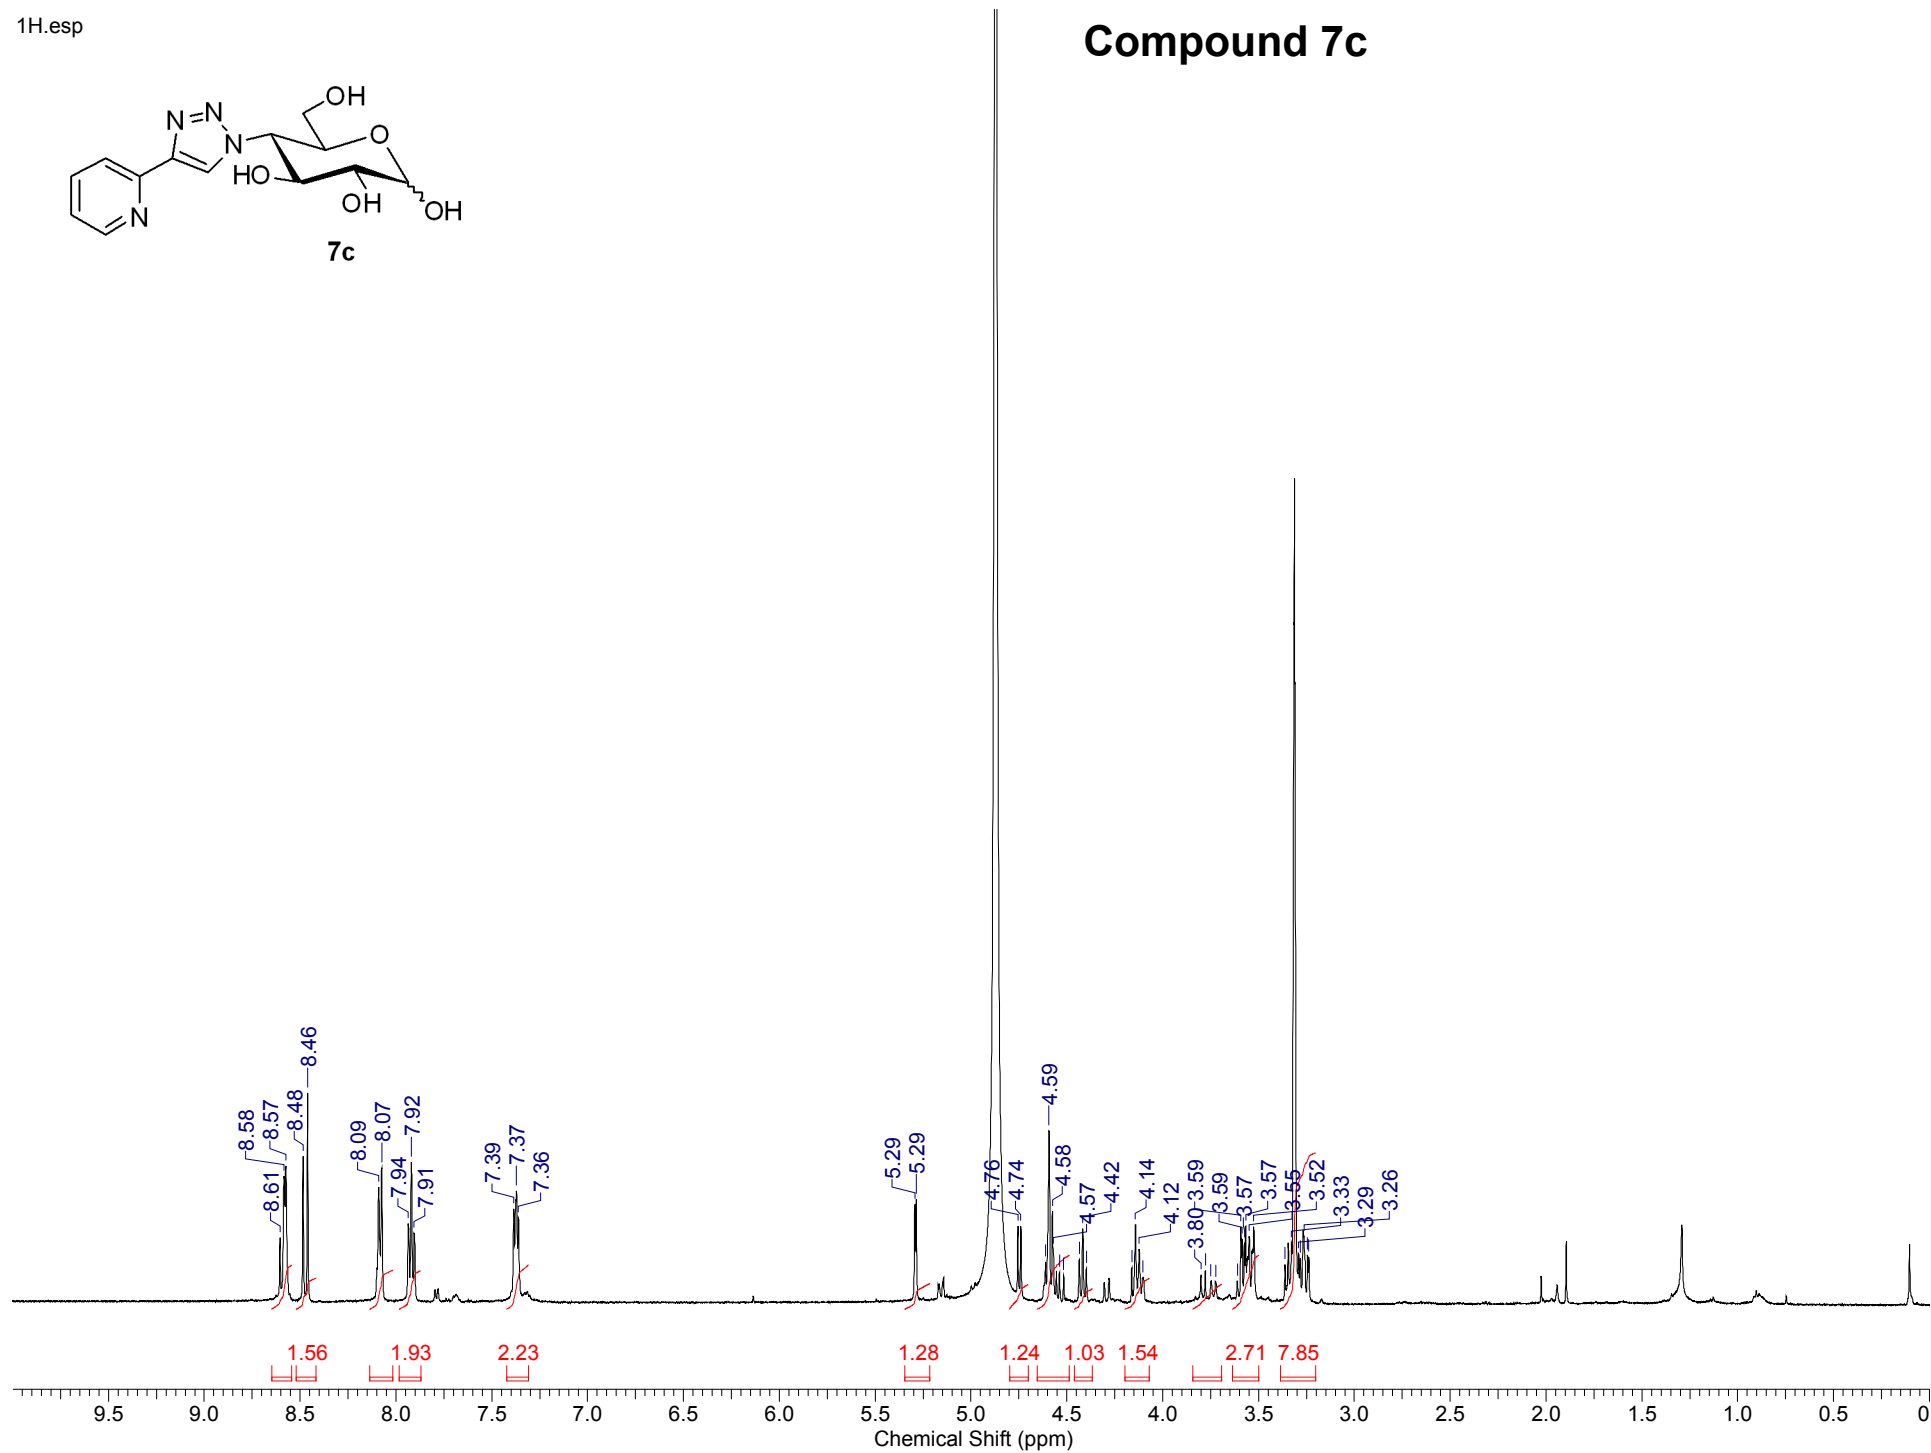

## Compound 7c

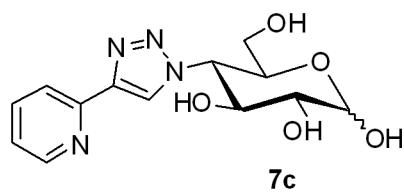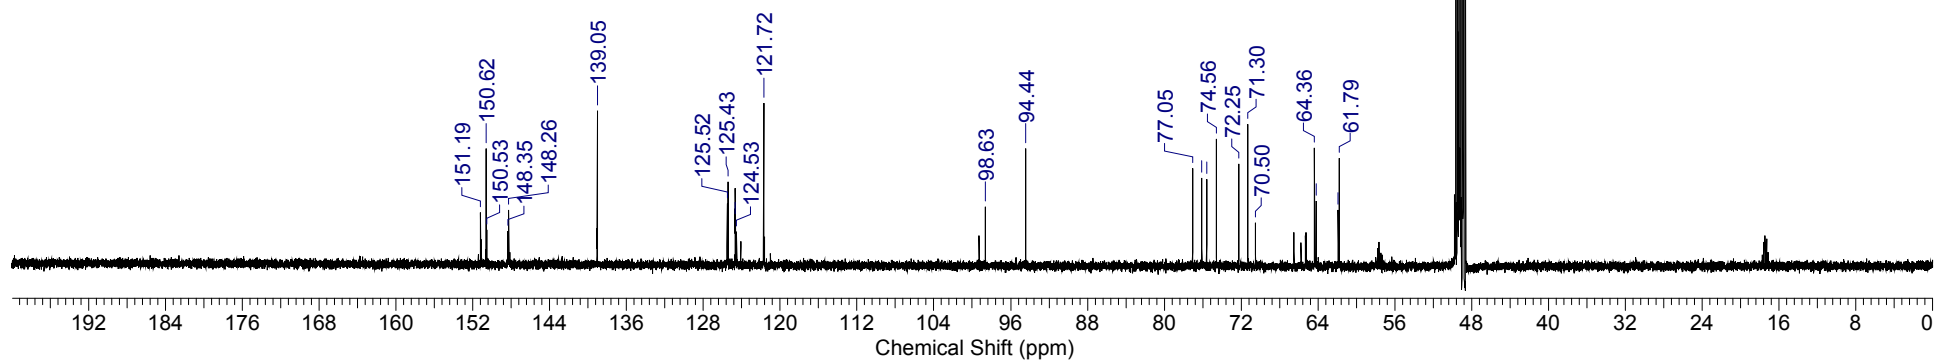

# Compound 7d

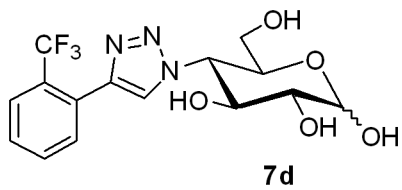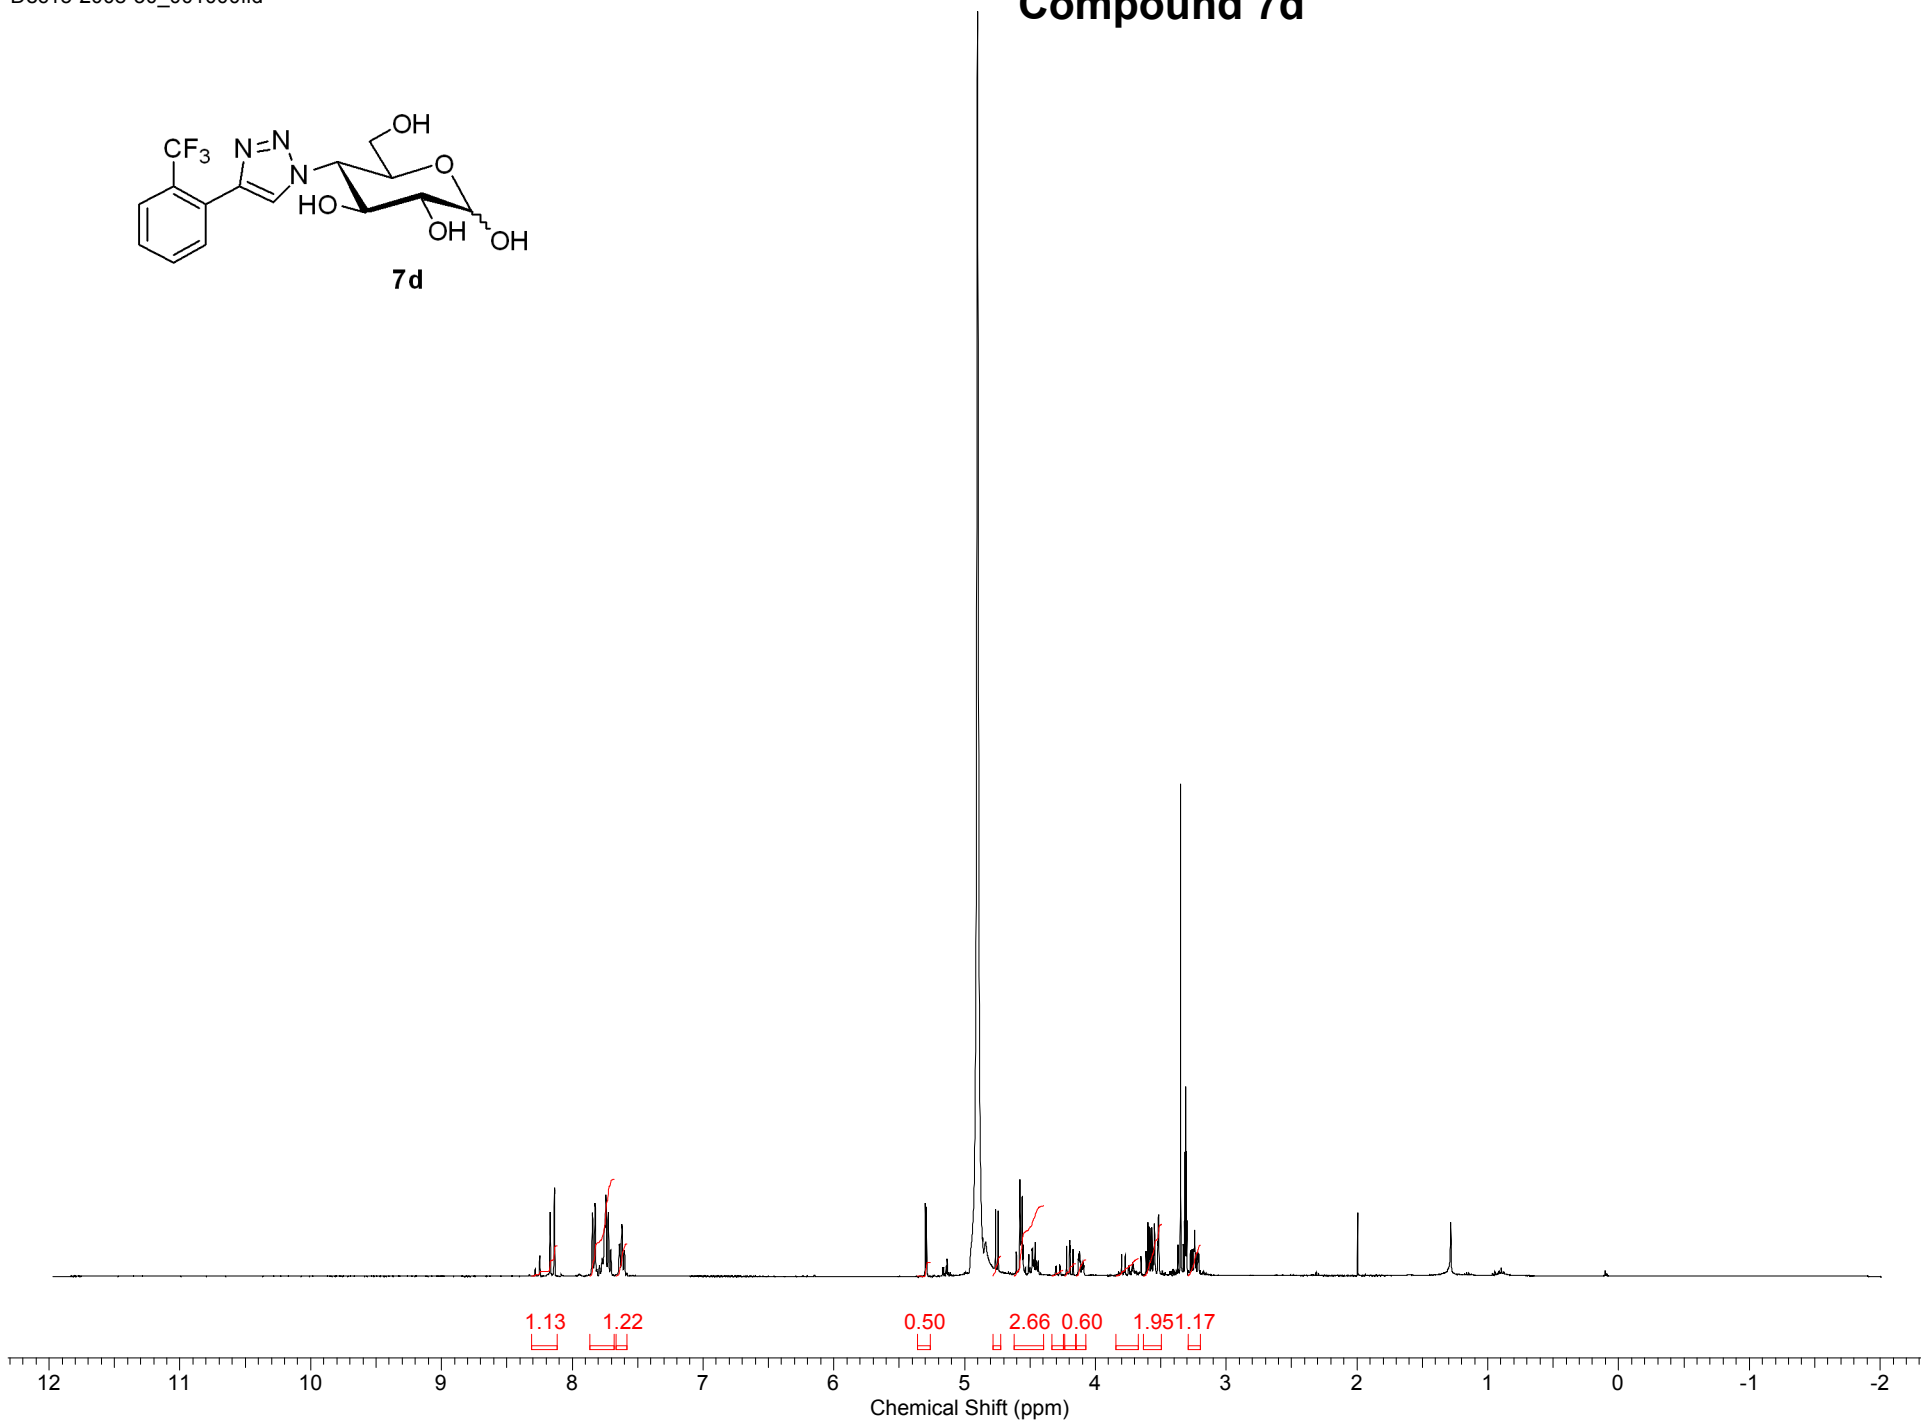



## Compound 7d

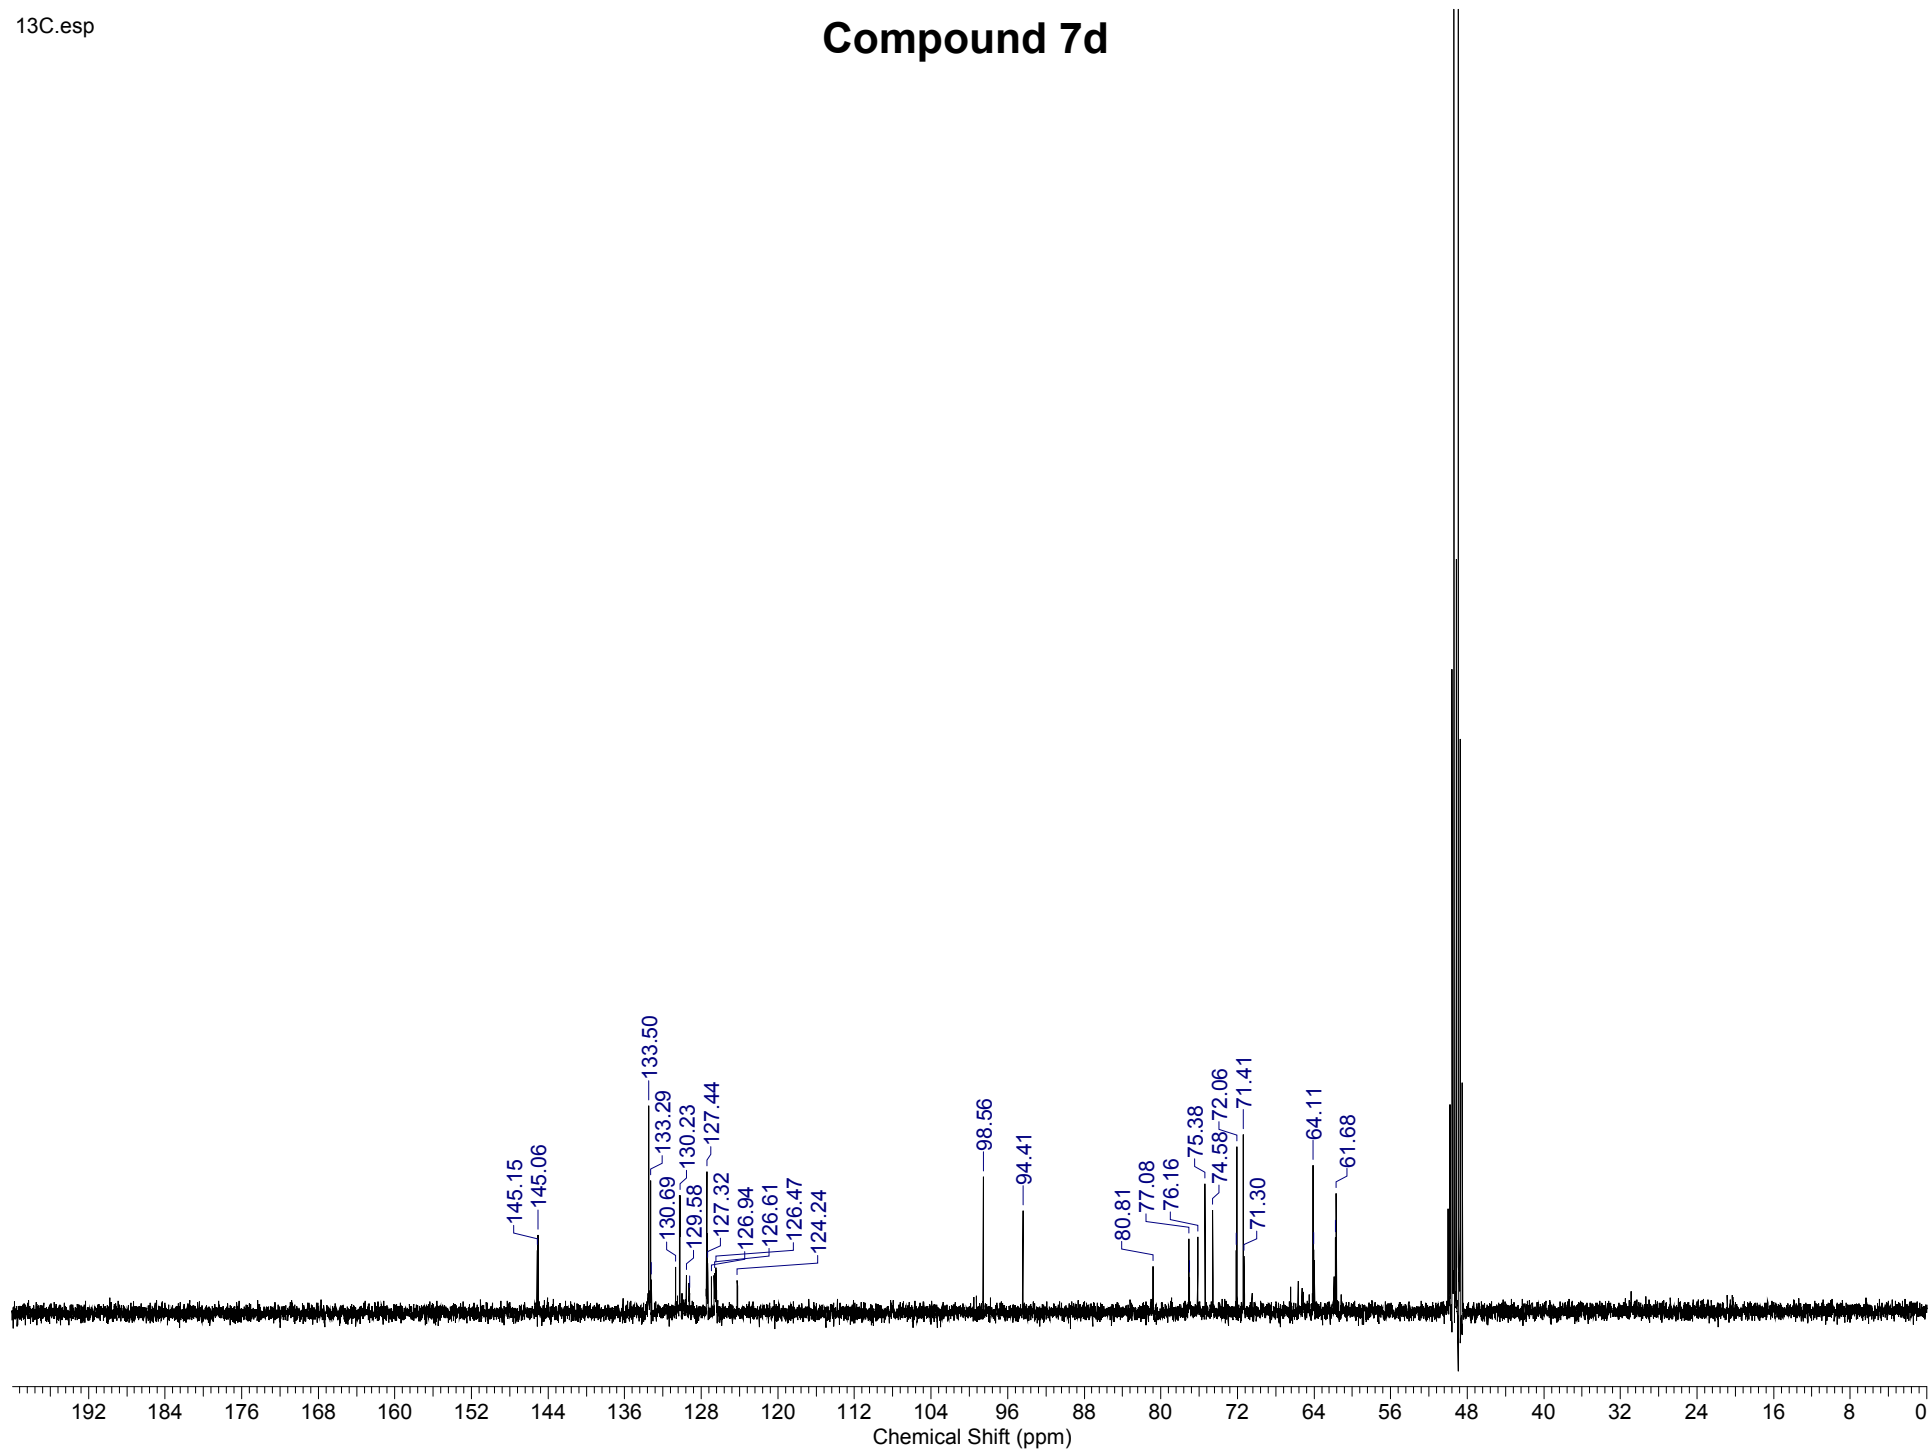

## Compound 8a

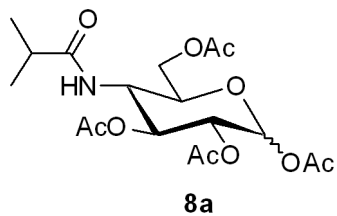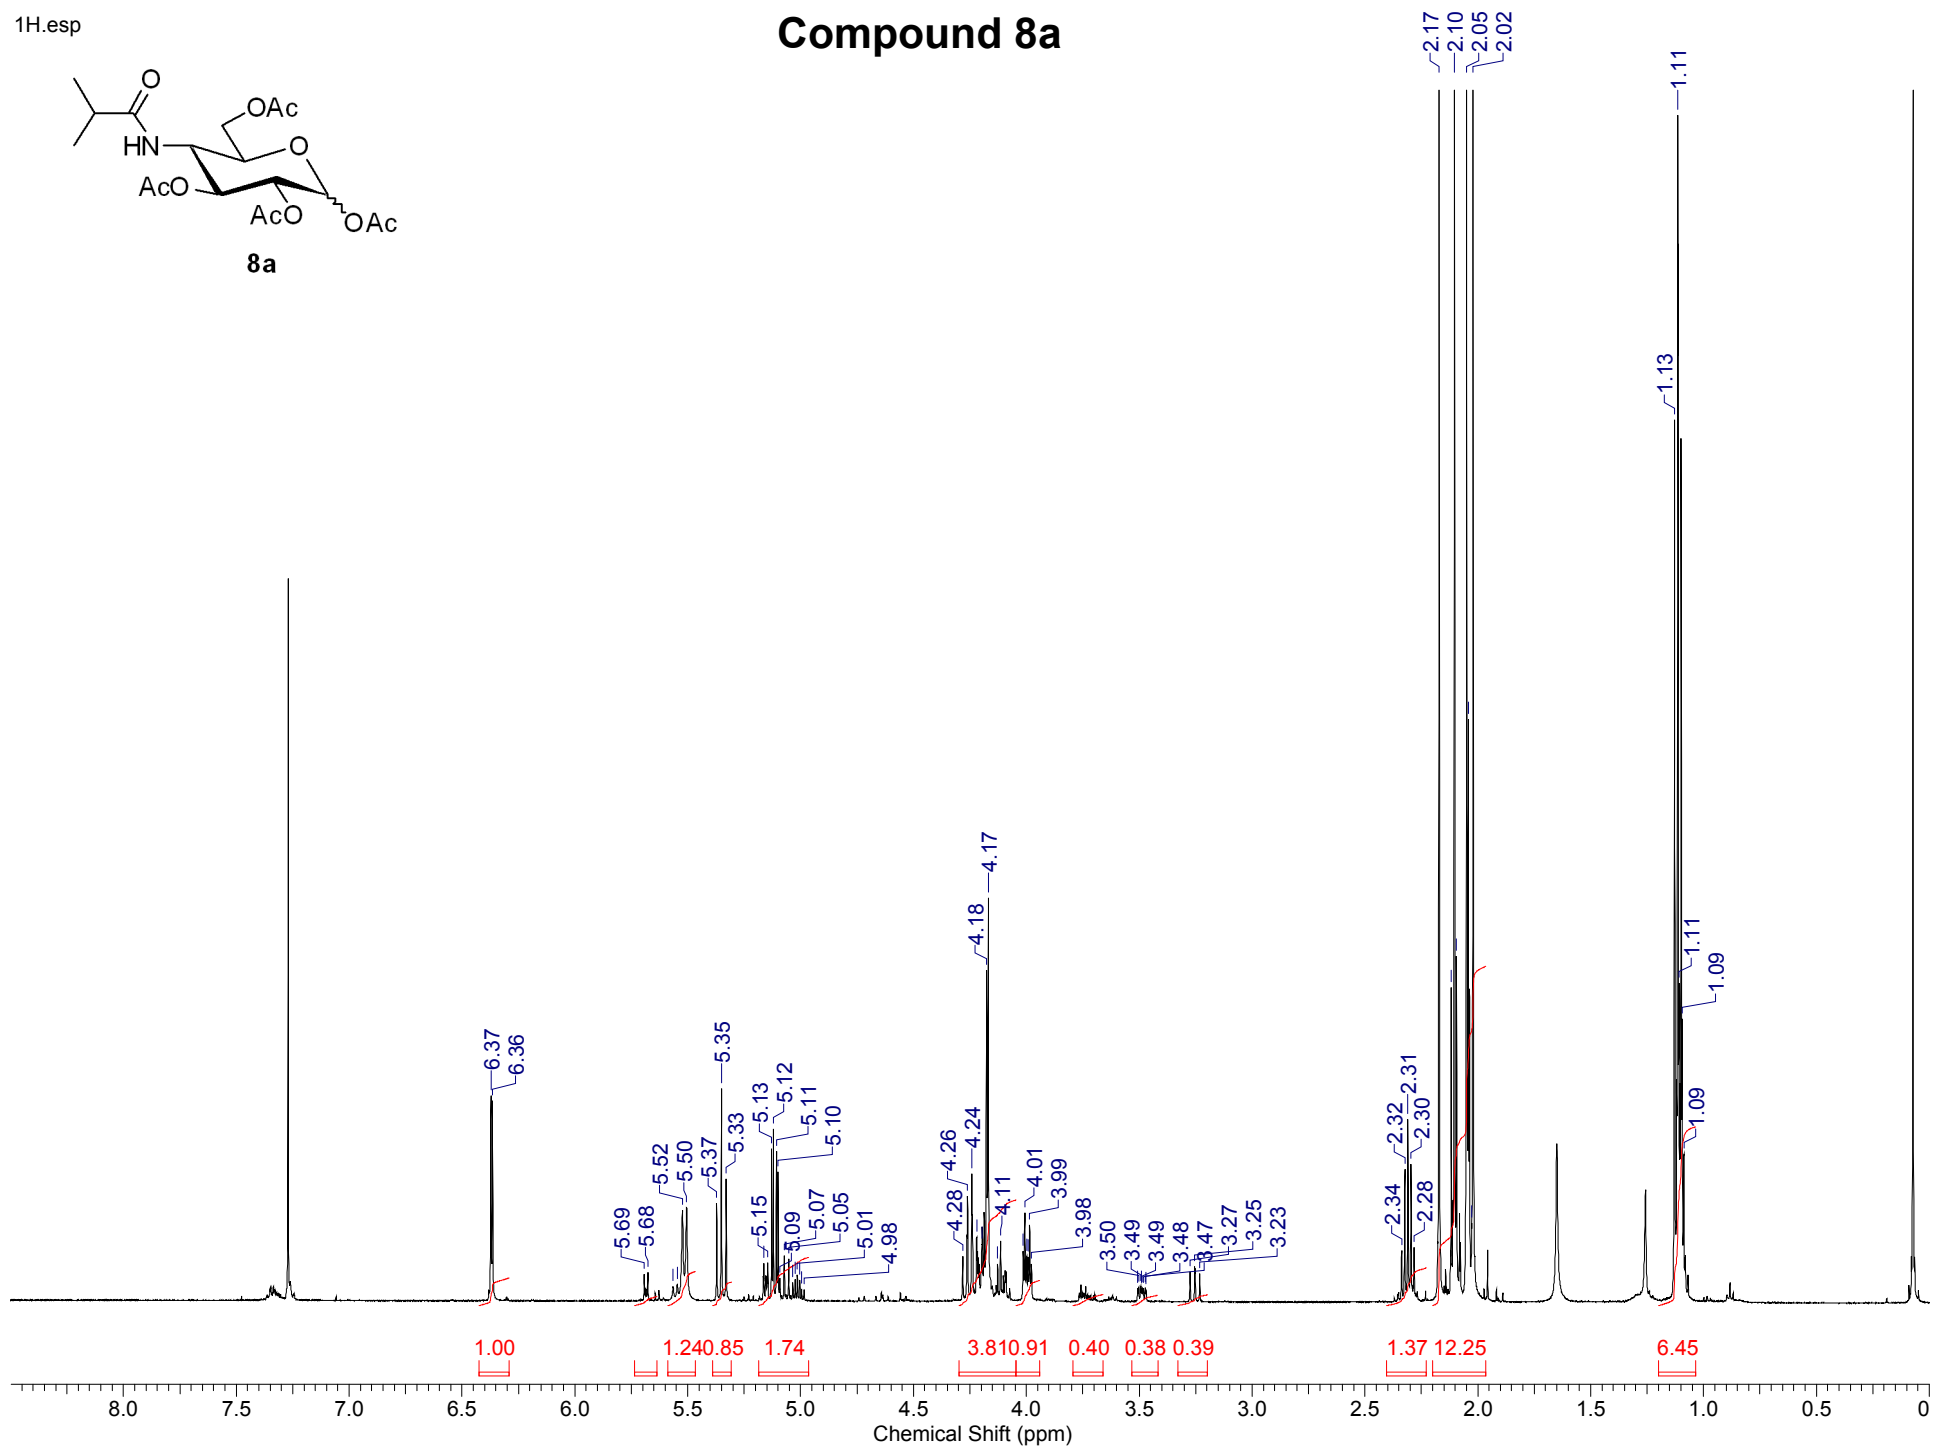

## Compound 8a

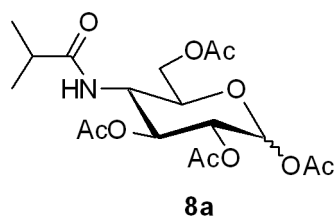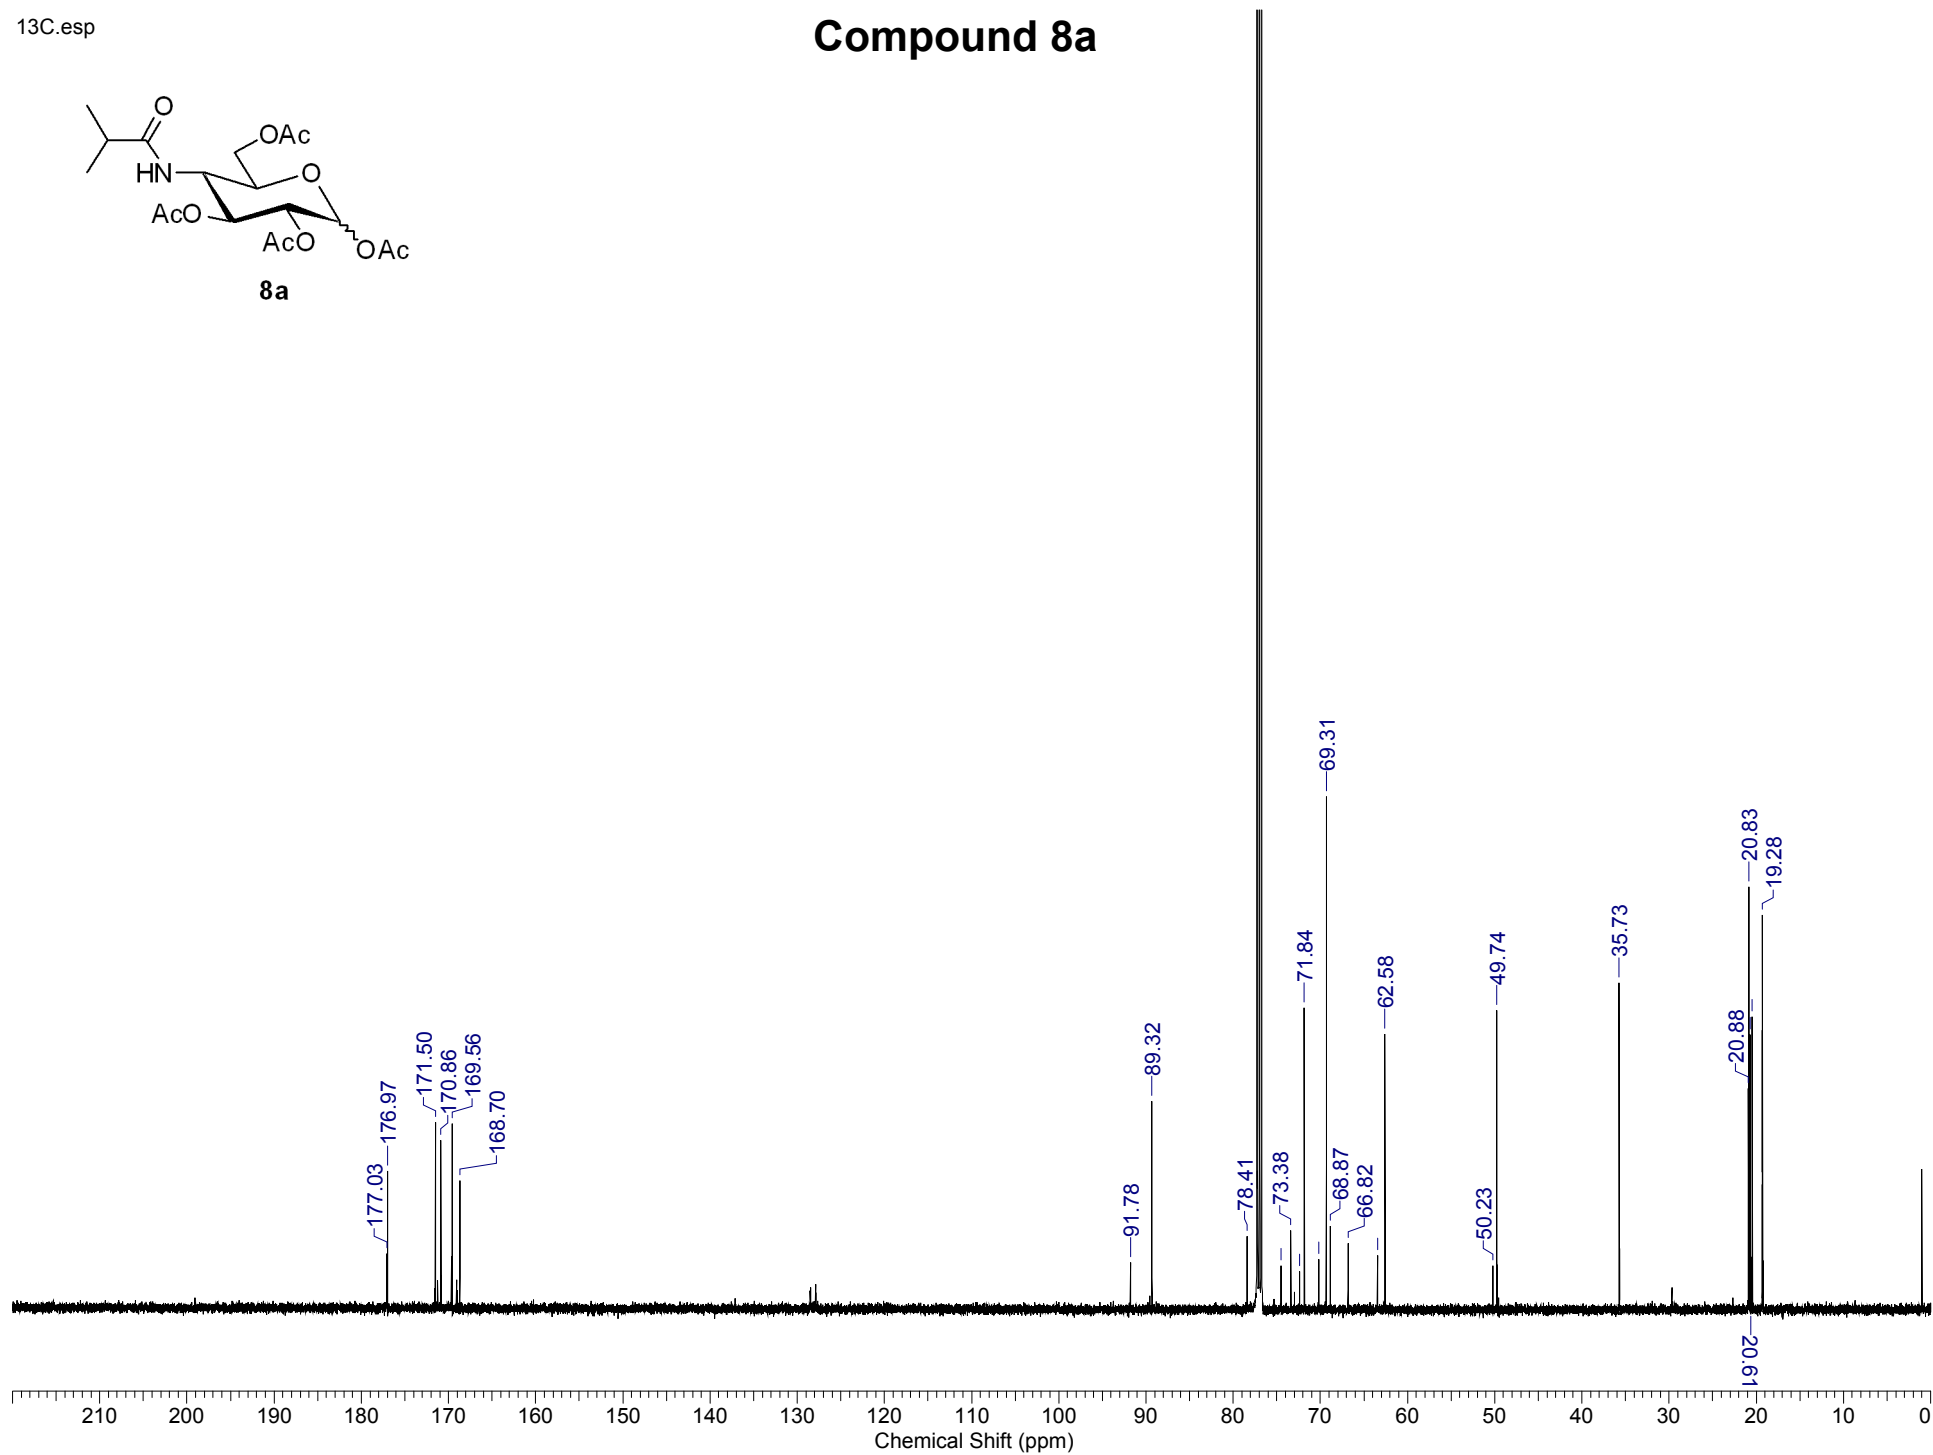

## Compound 8b

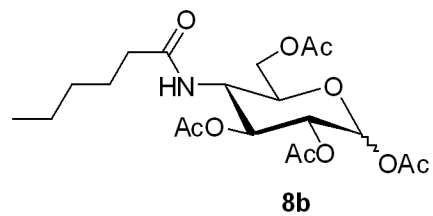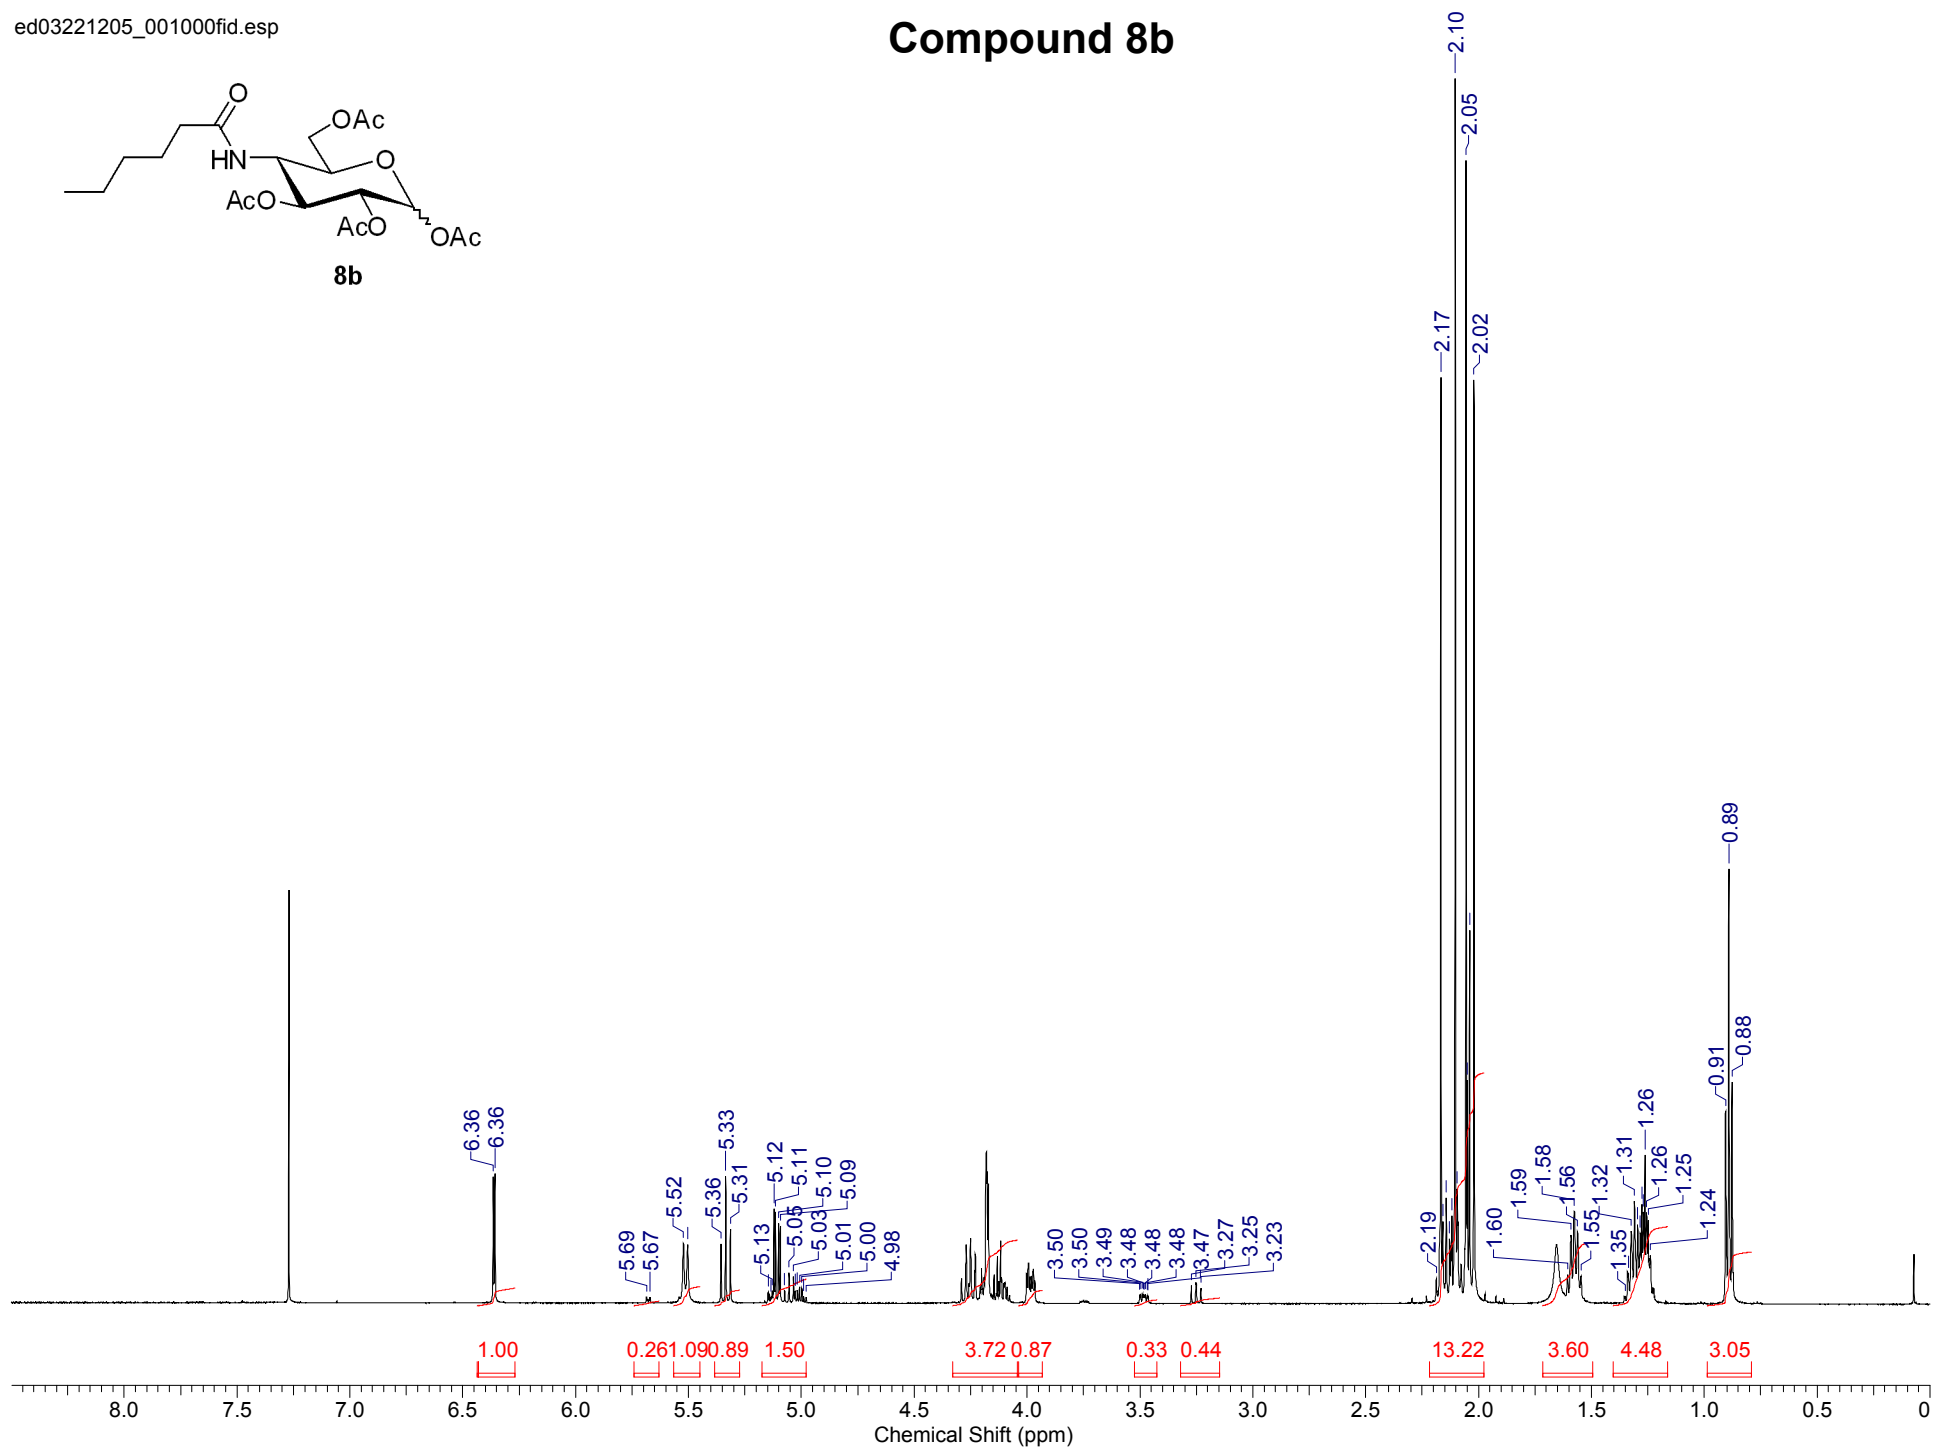

# Compound 8b

13C.esp

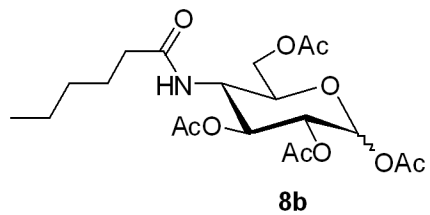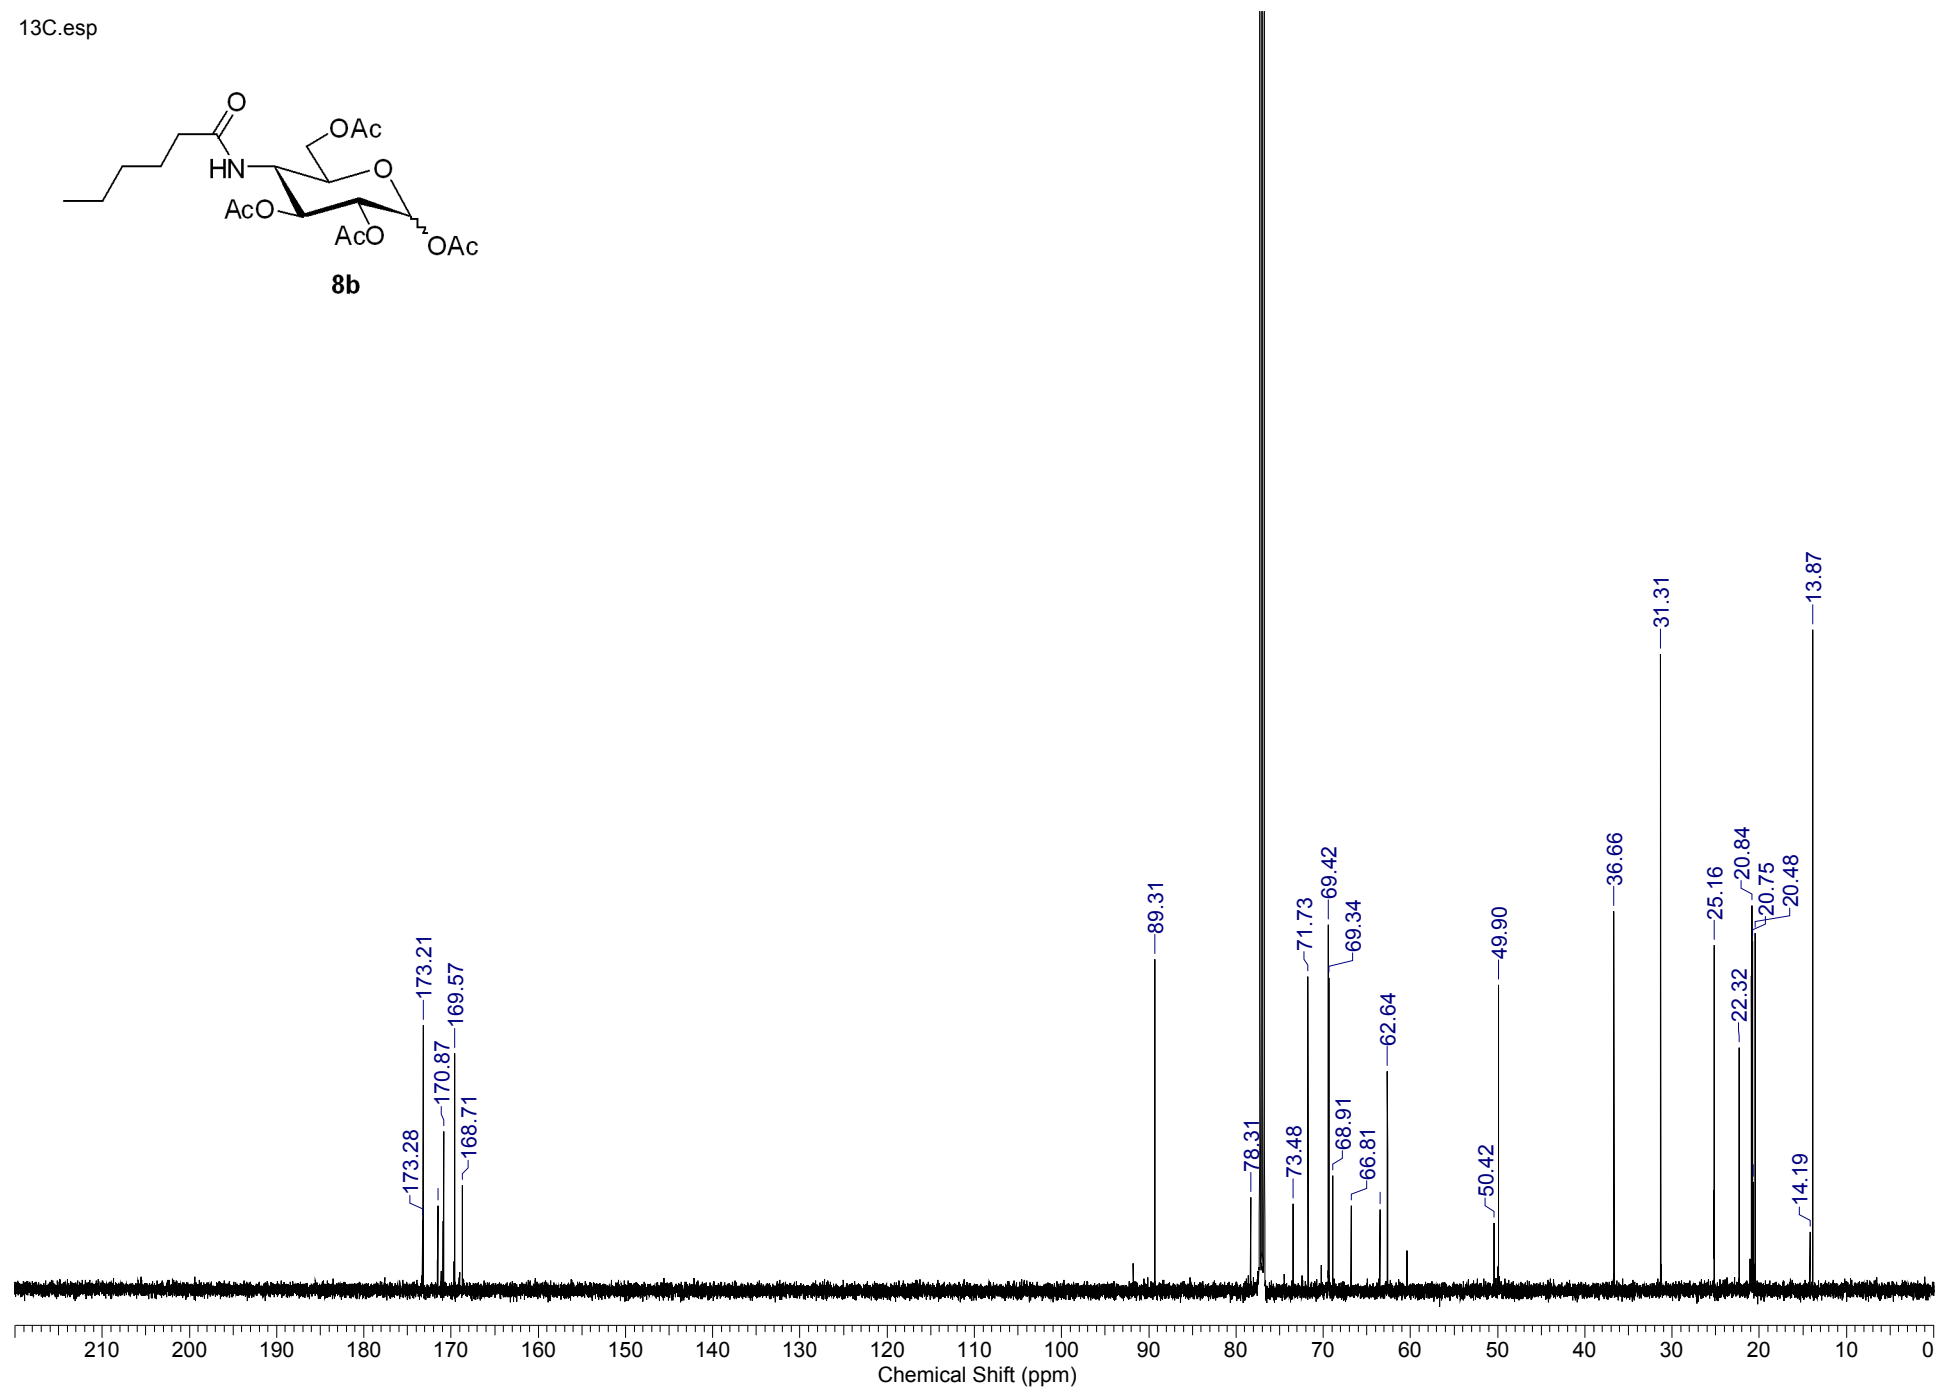

# Compound 8c

1H.esp

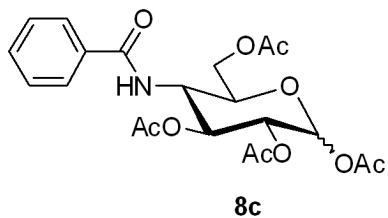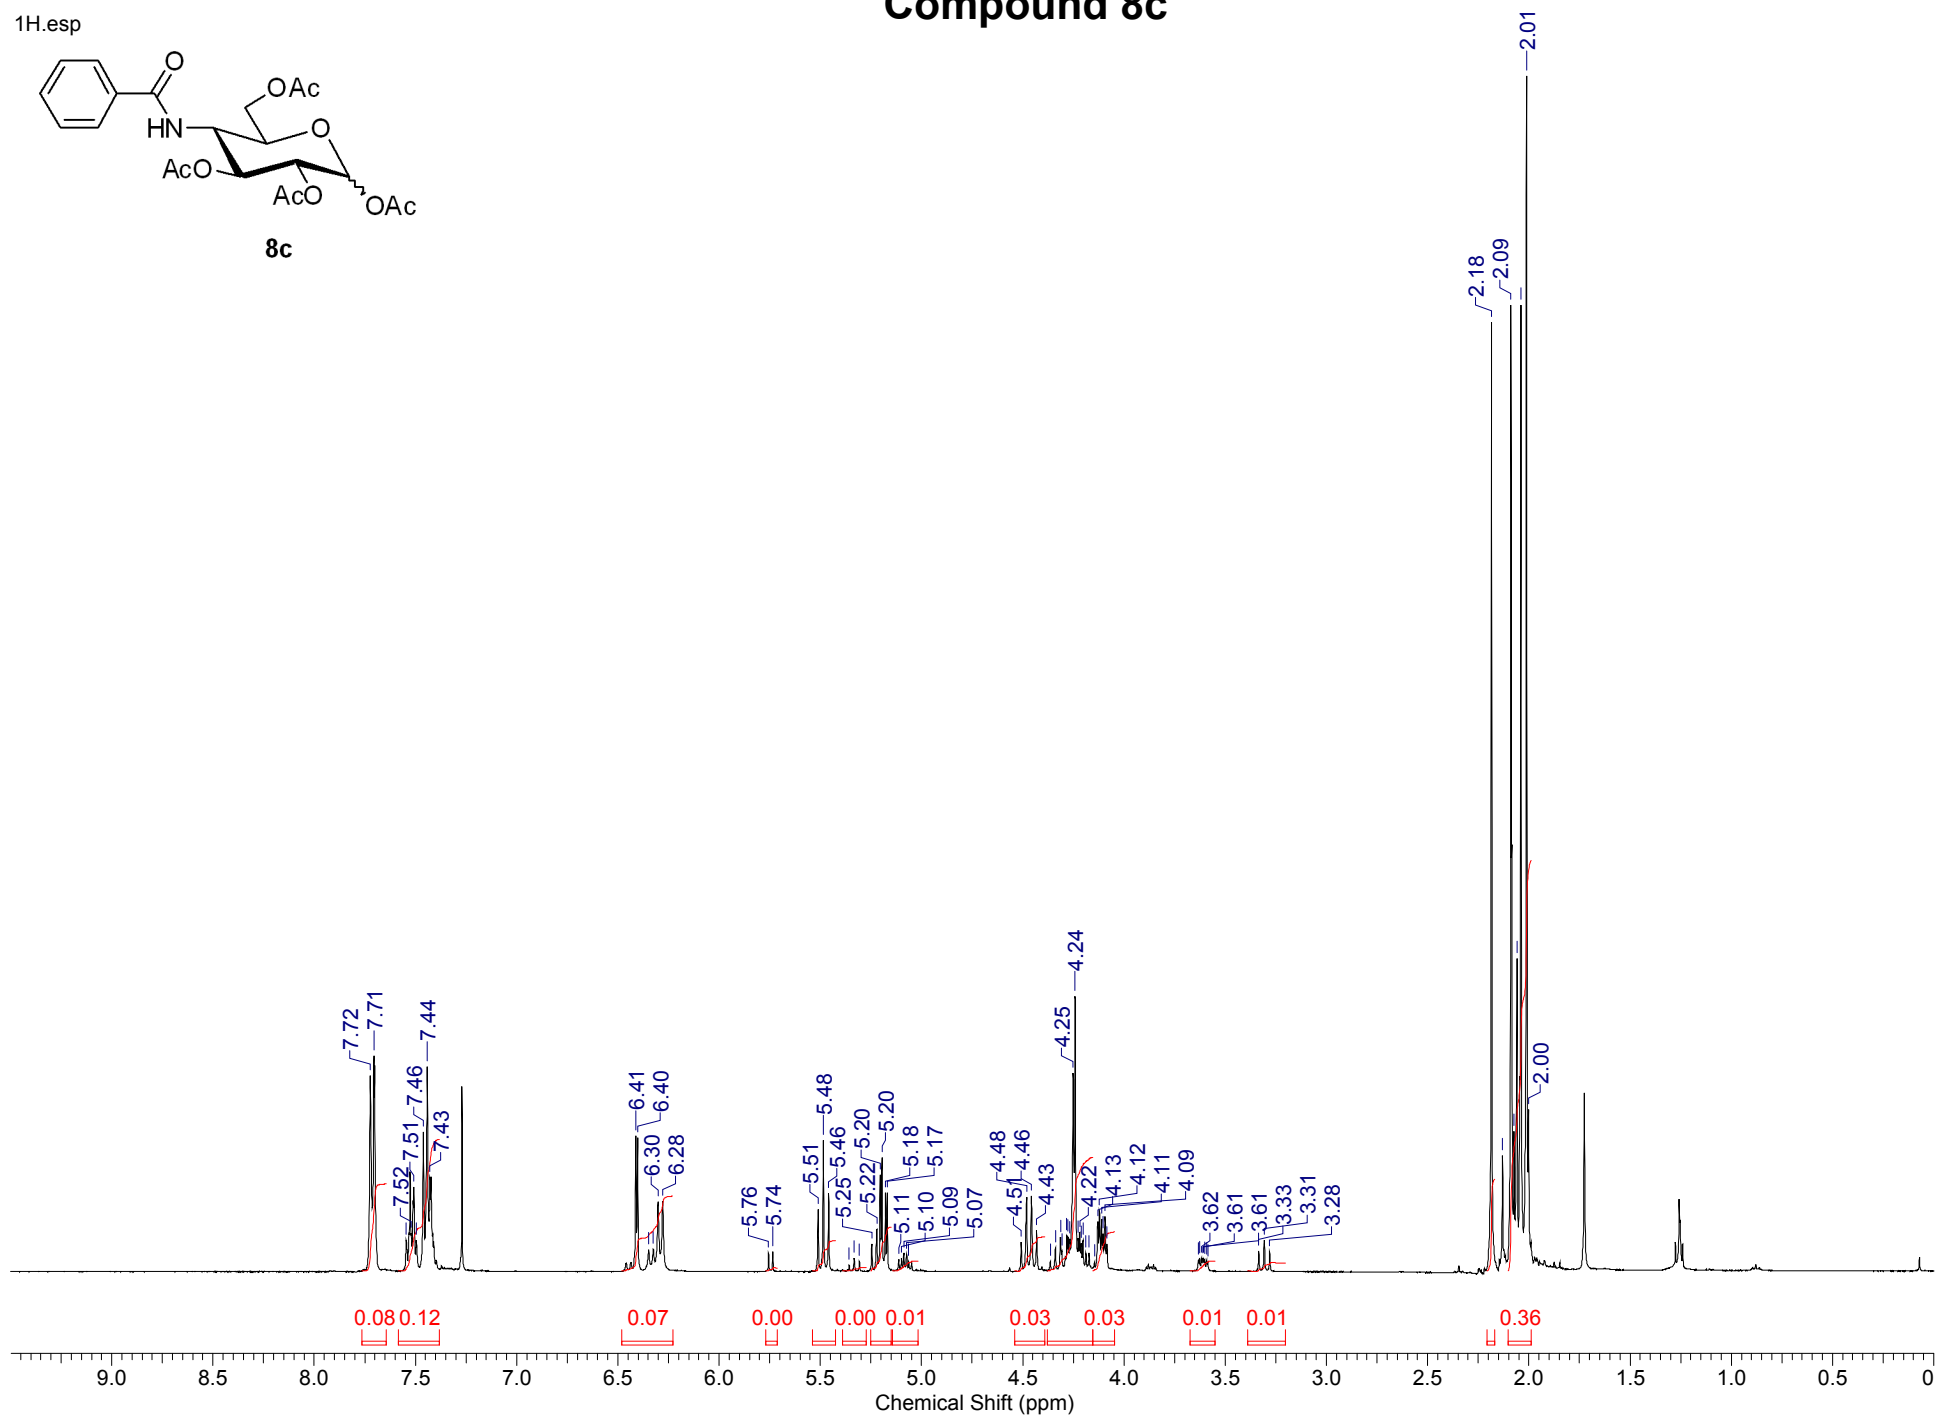

## Compound 8c

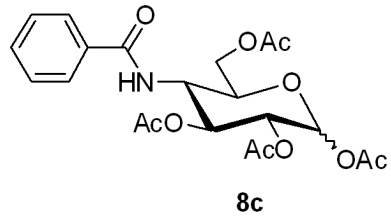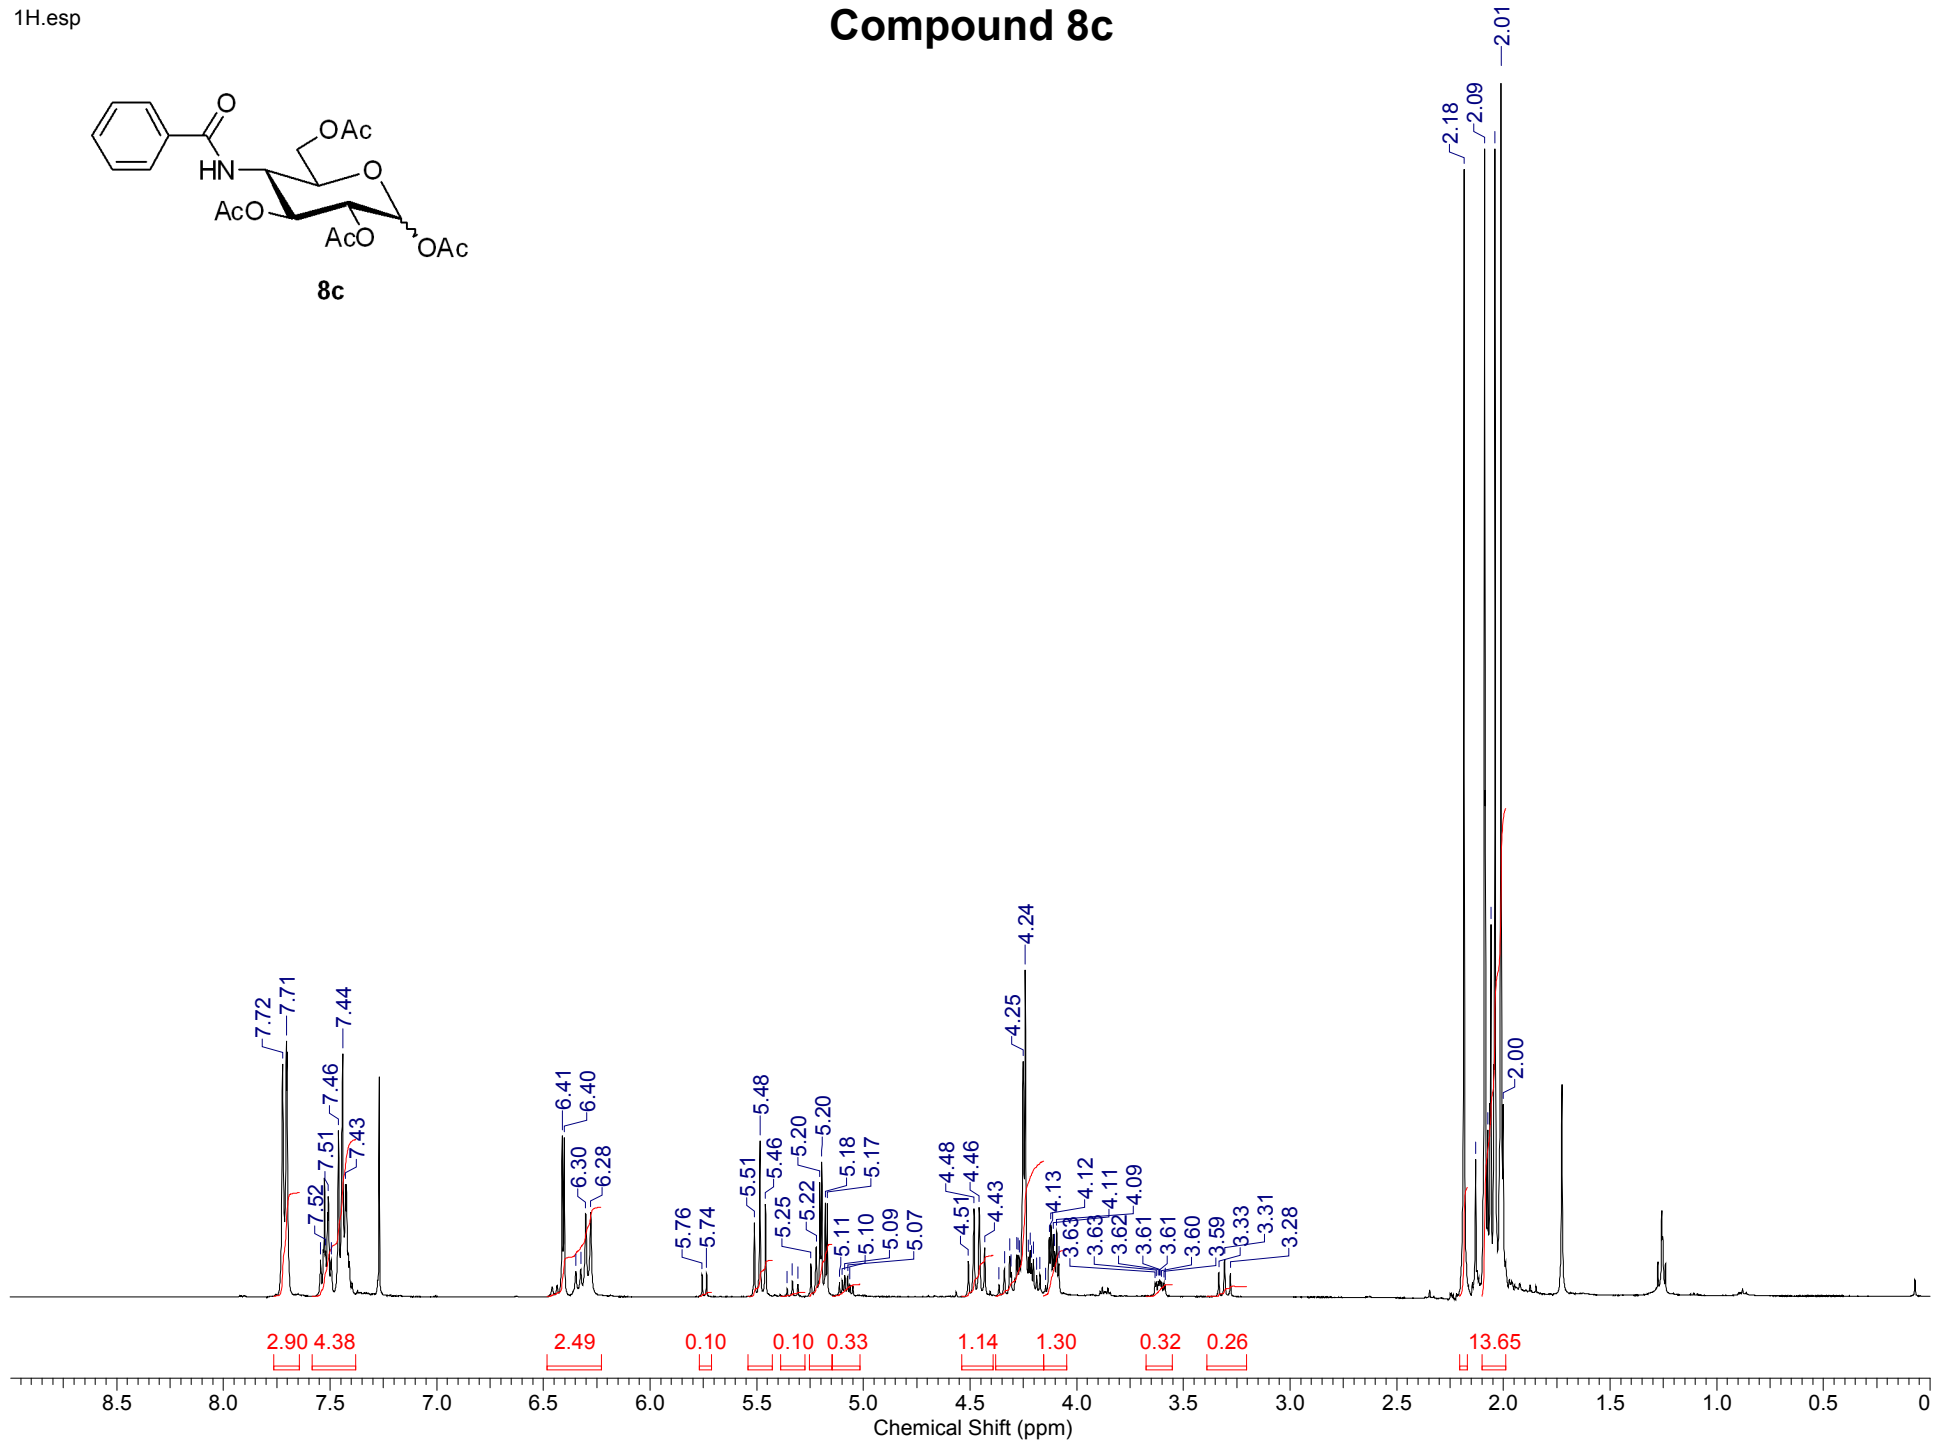

## Compound 8d

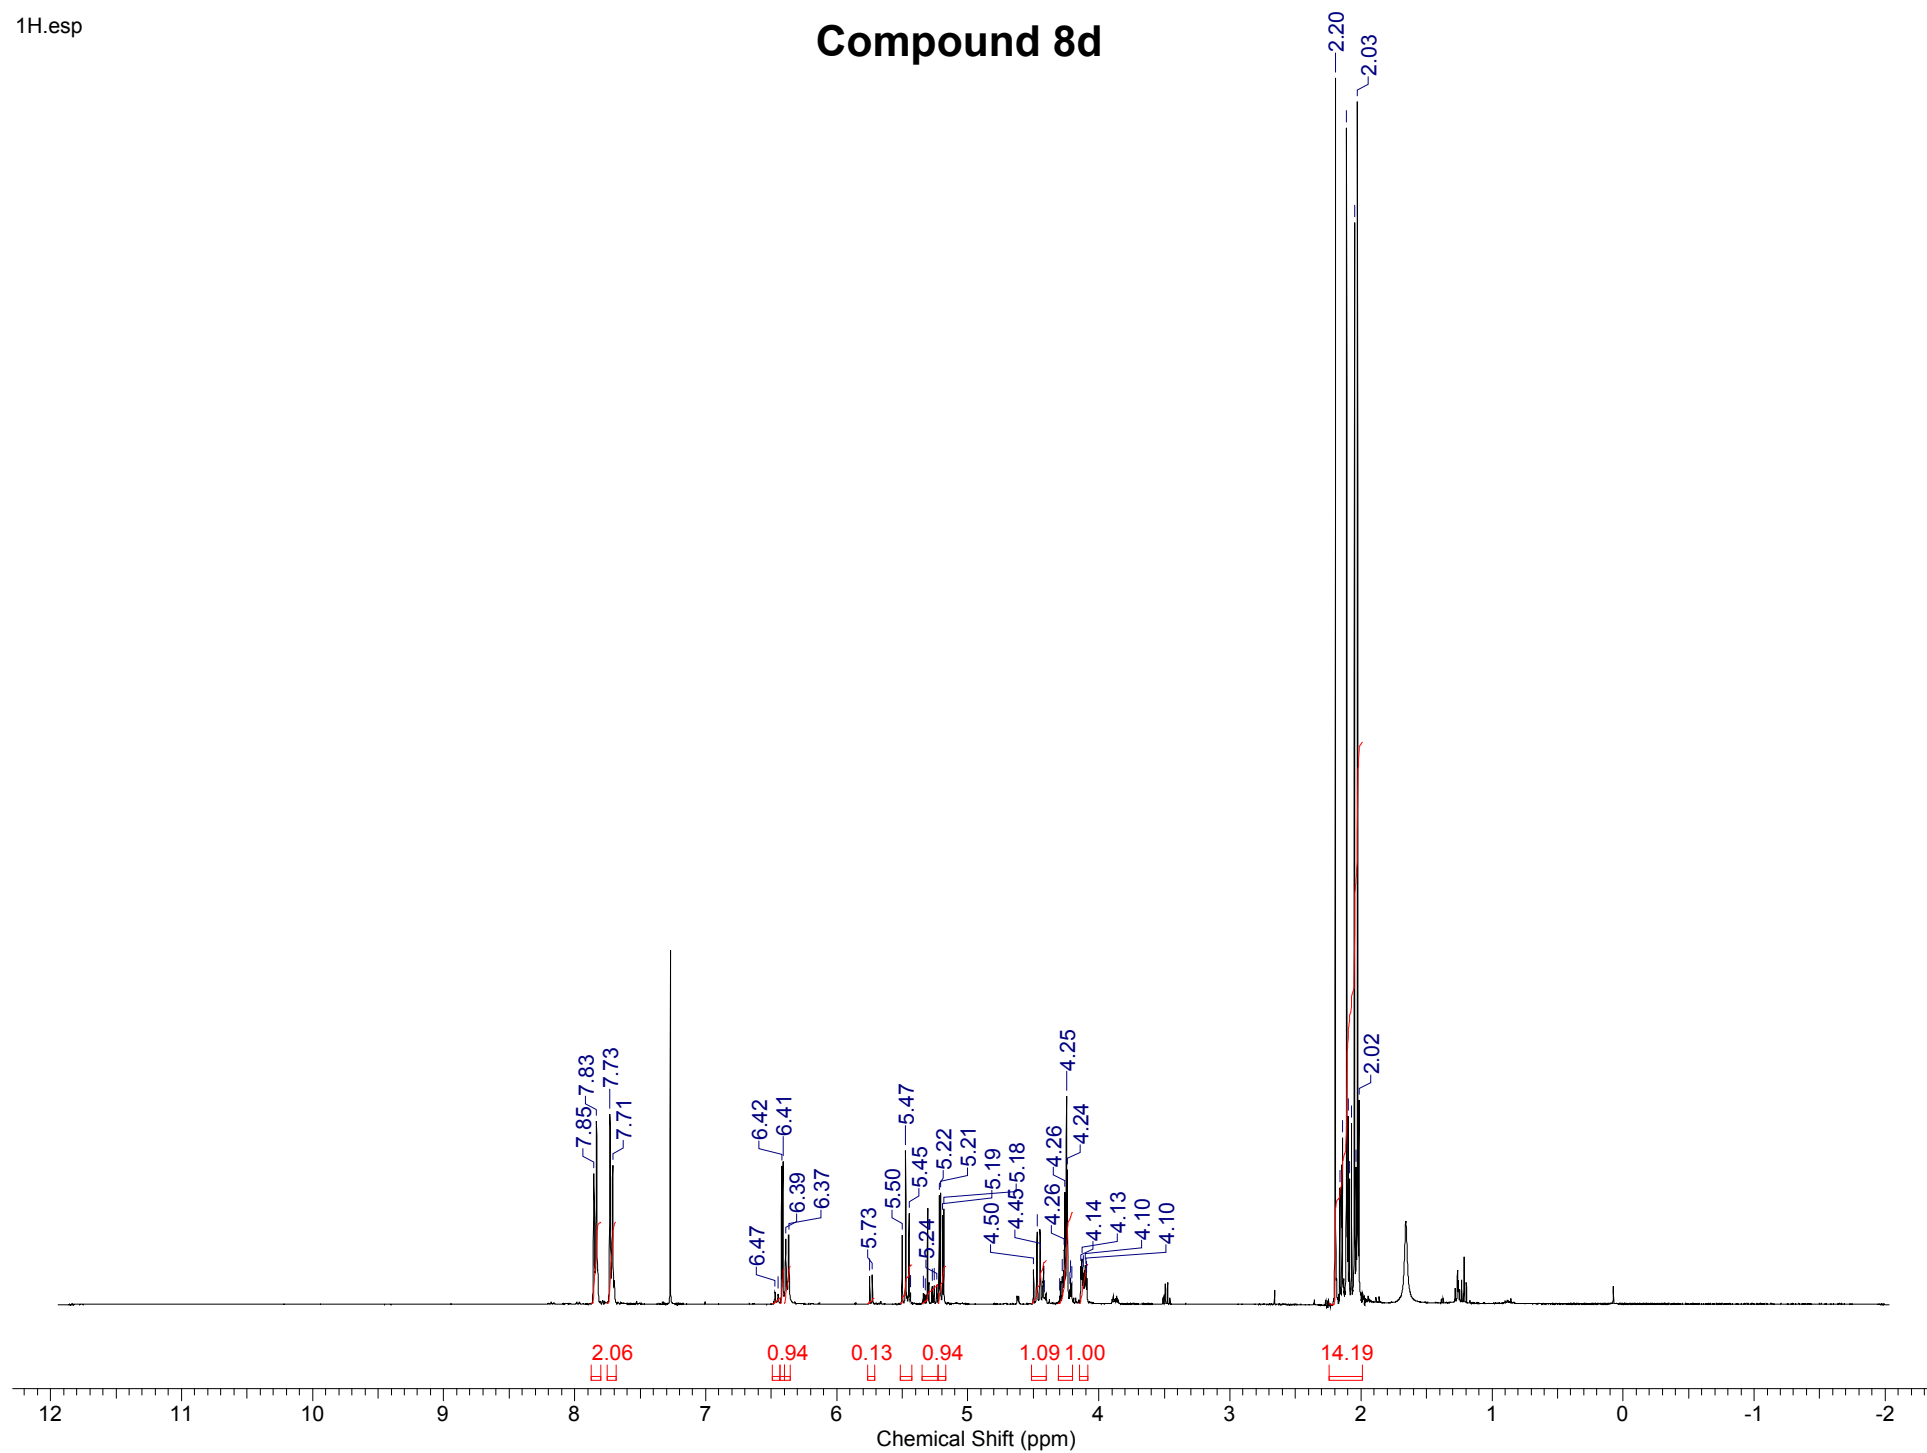



## Compound 8d

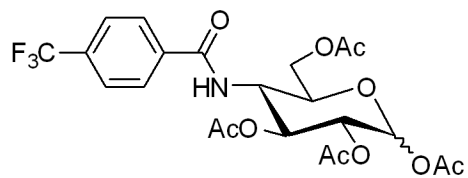

8d

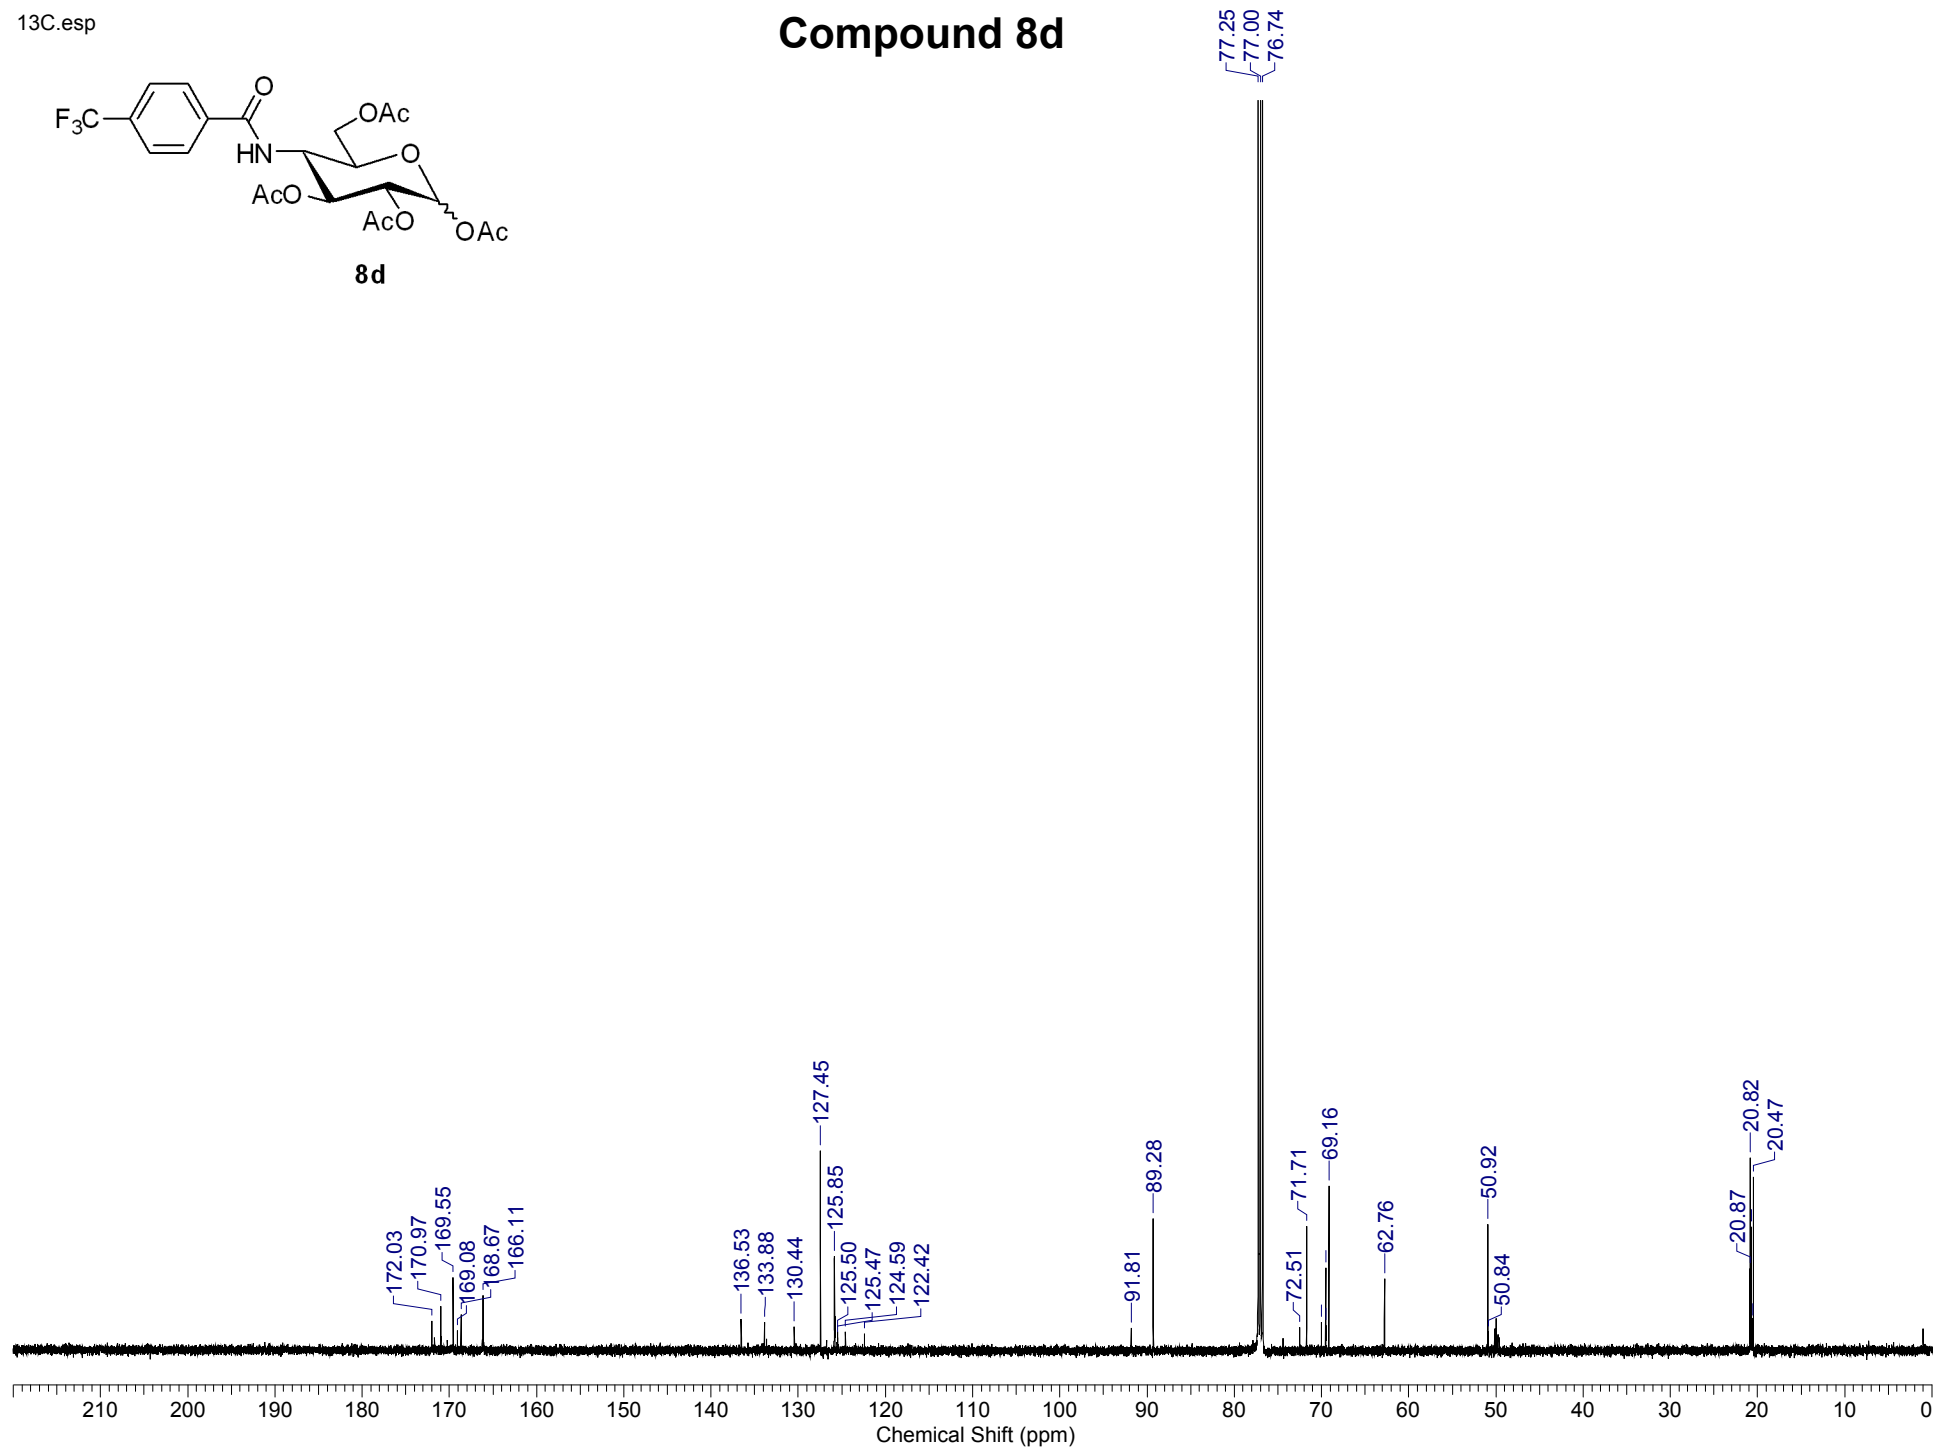

1H.esp

# Compound 9a

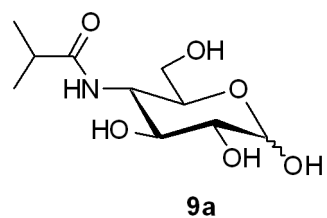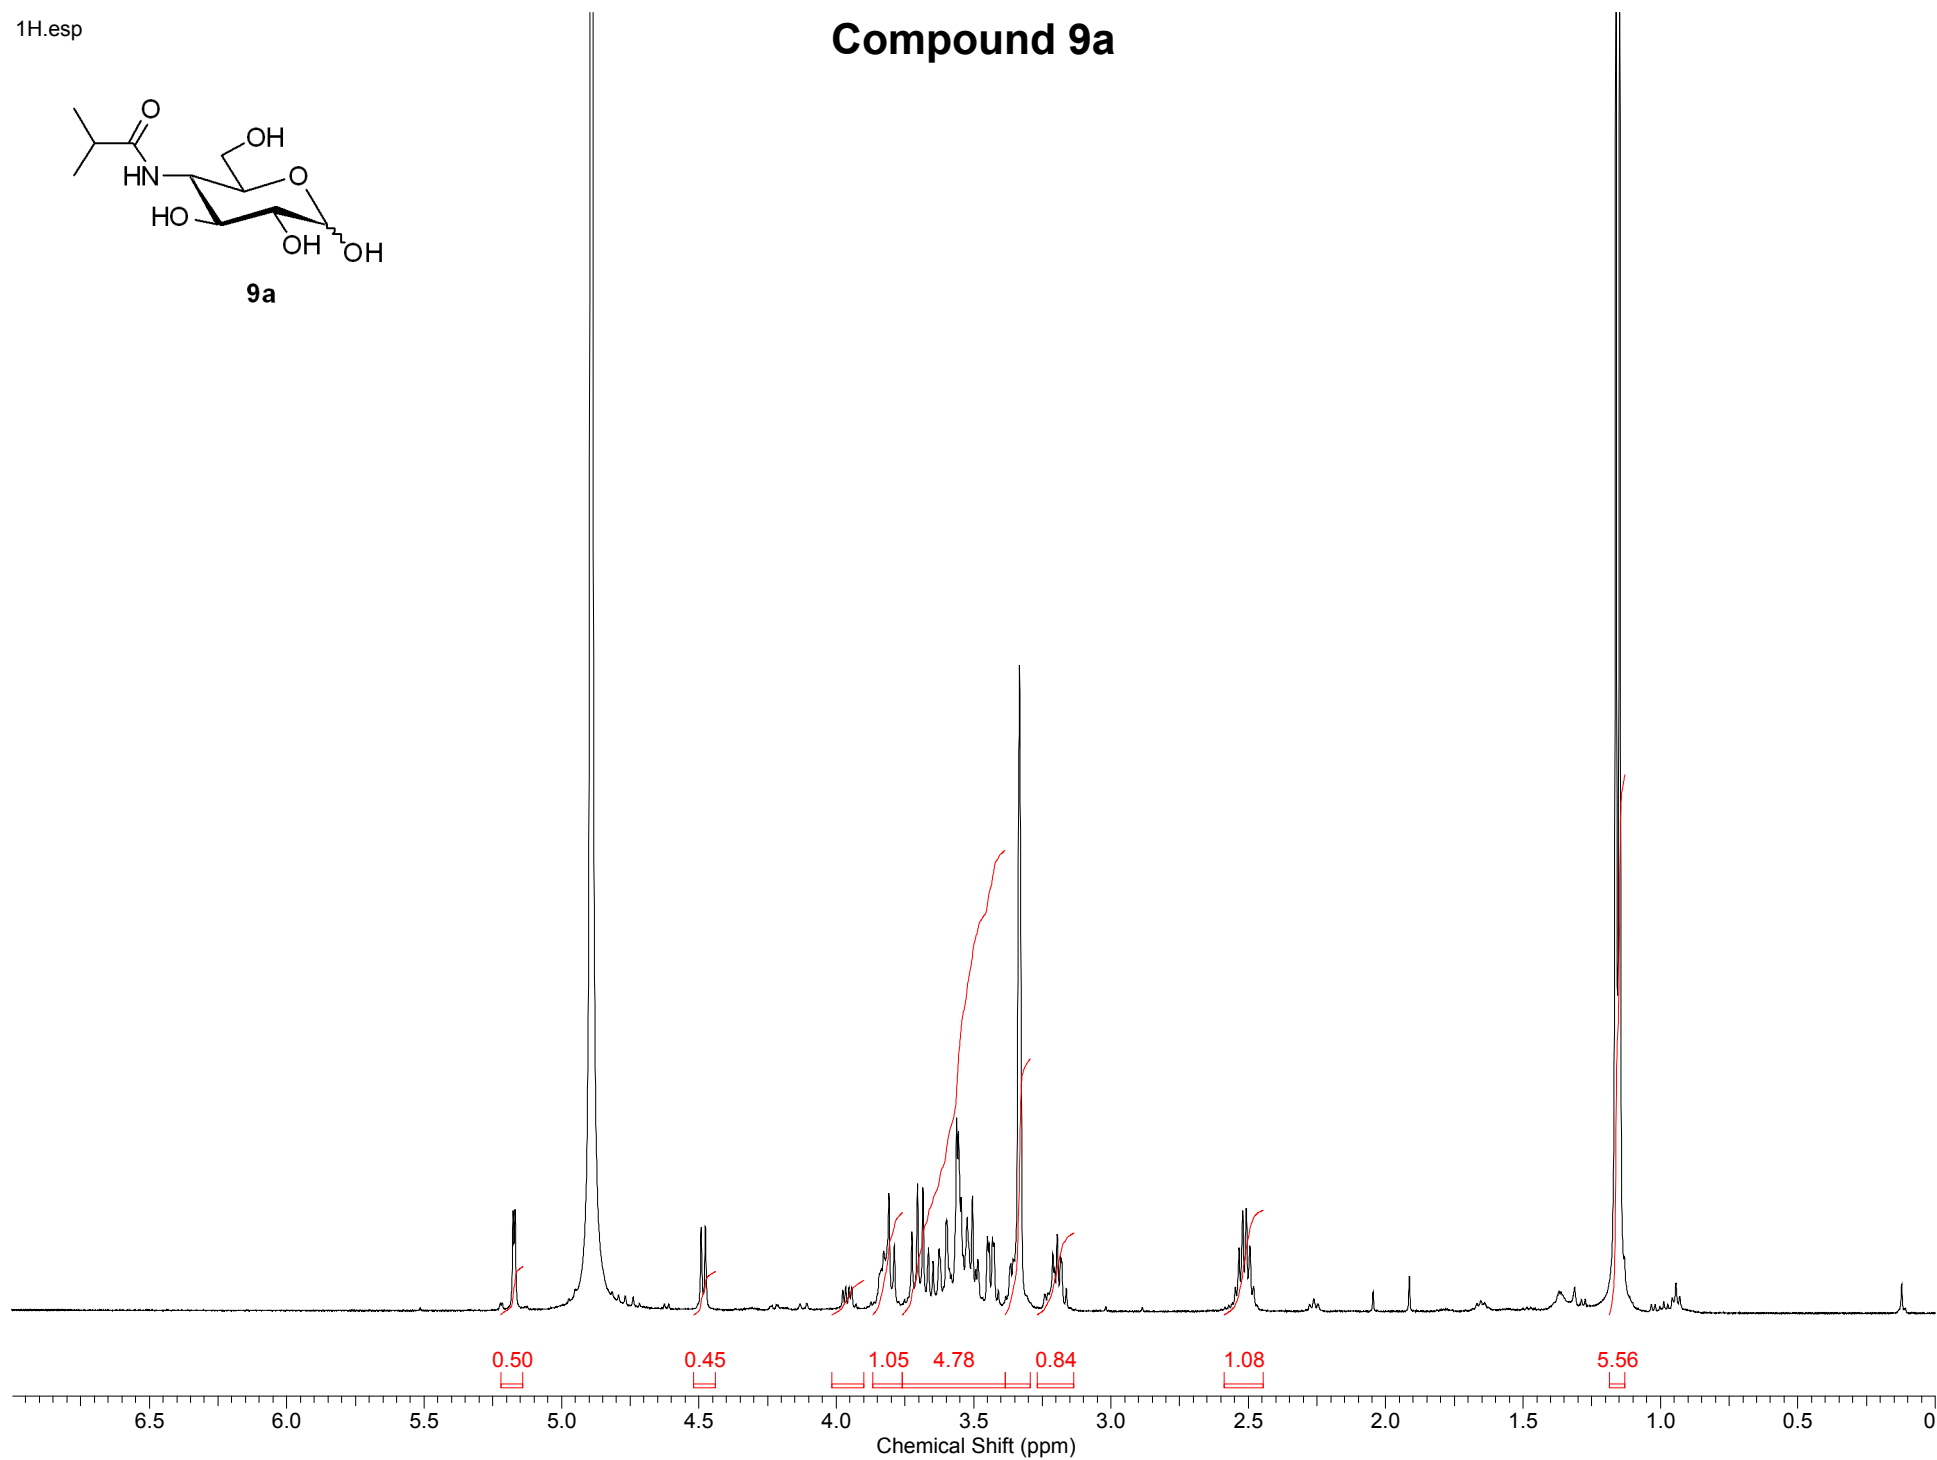

## Compound 9a

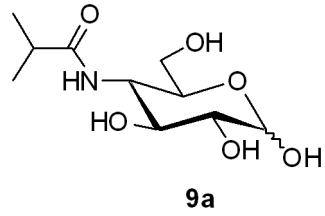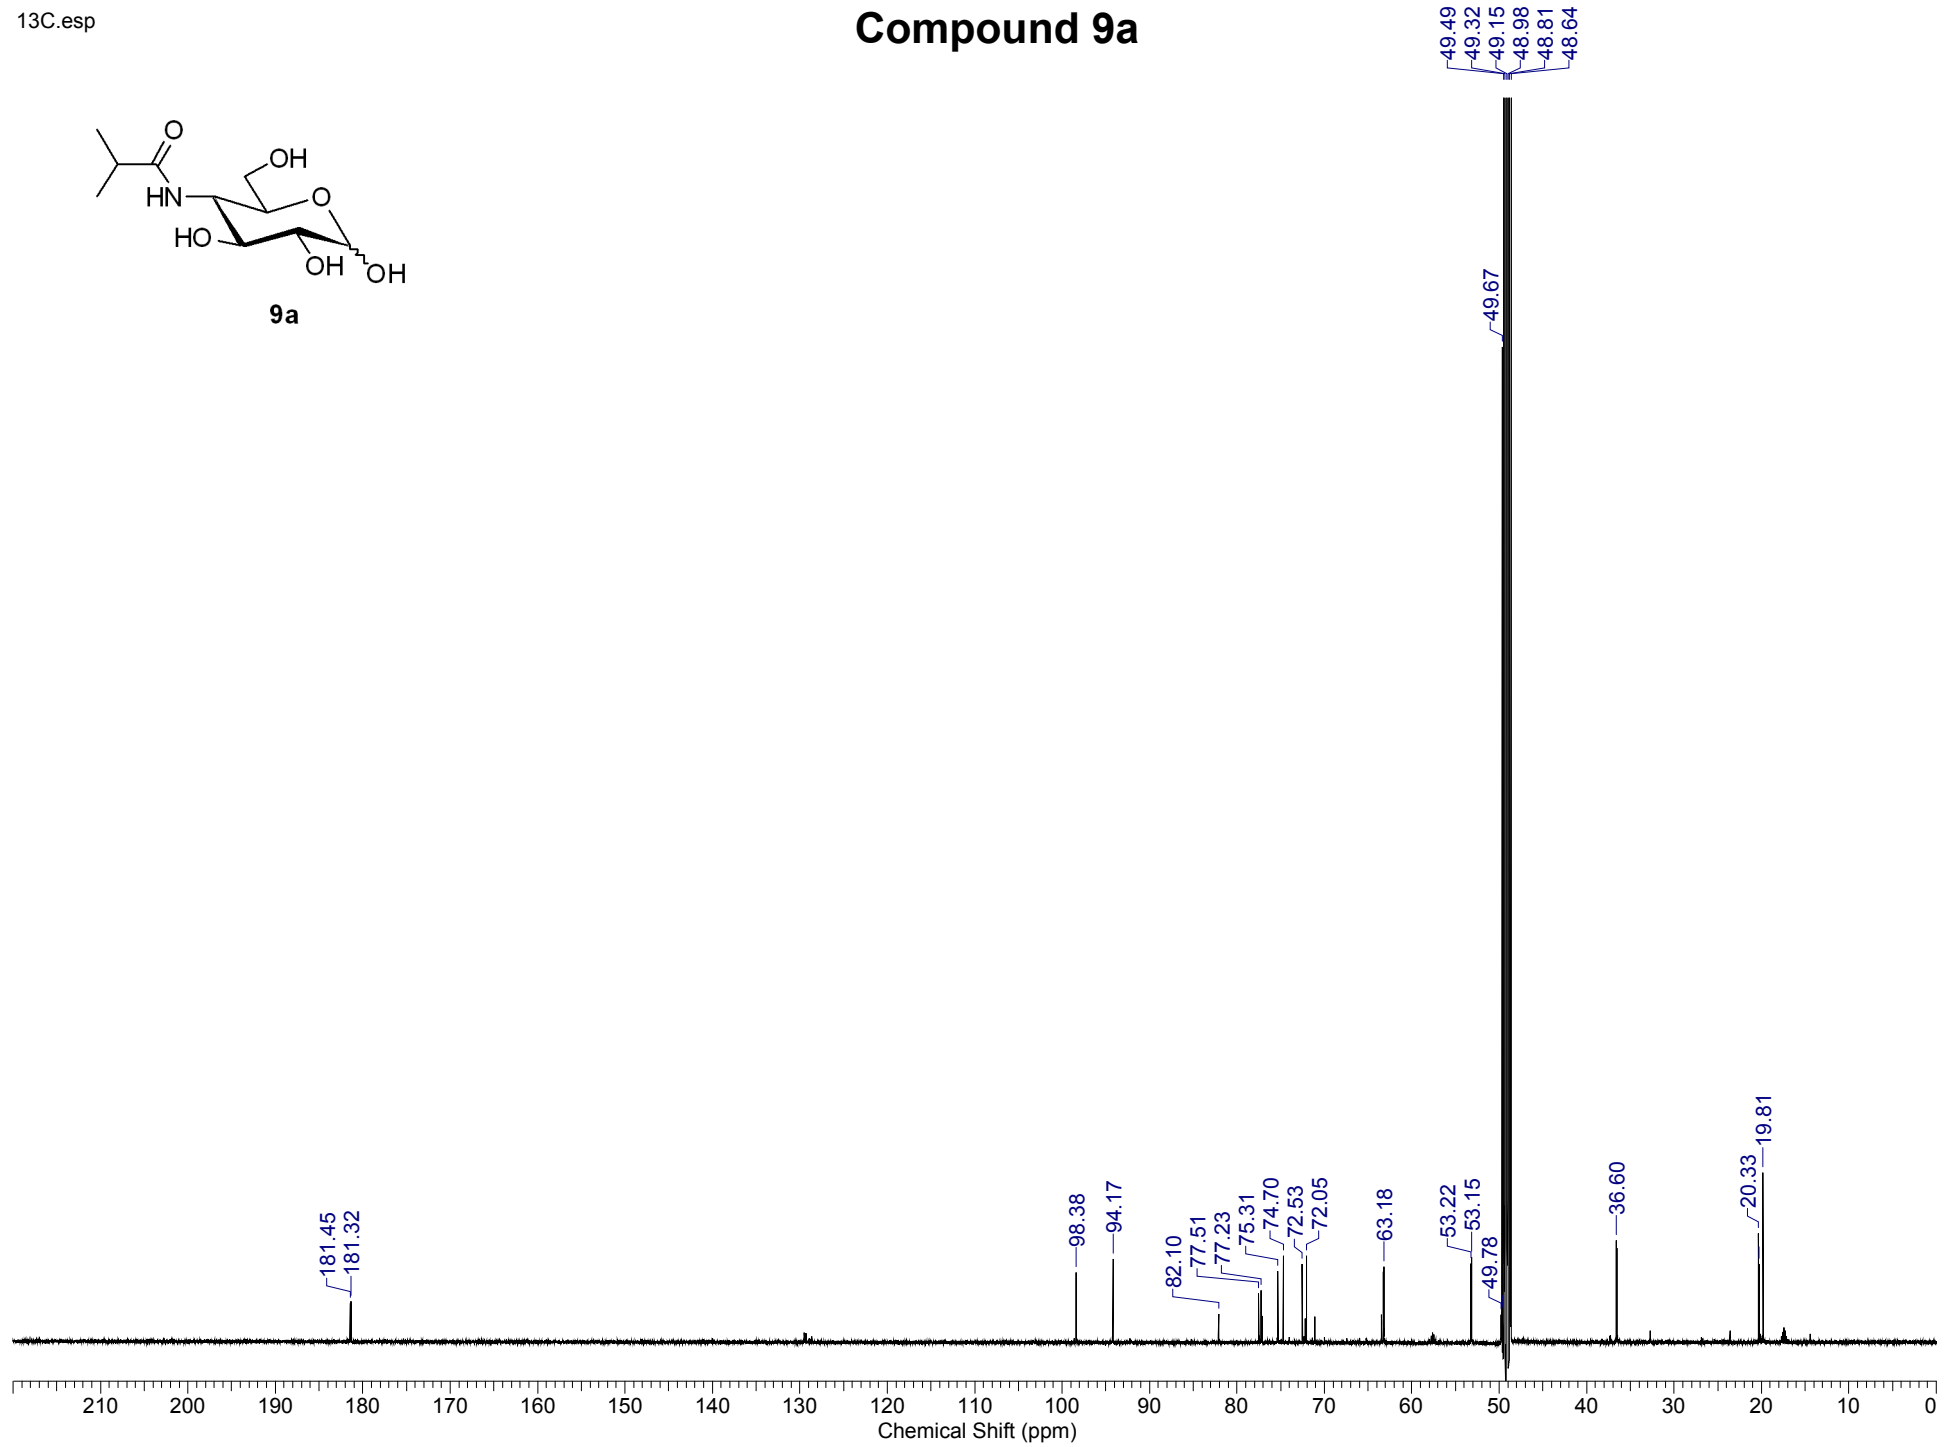

1H.esp

# Compound 9b

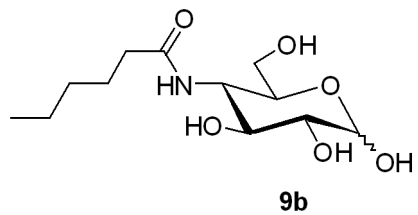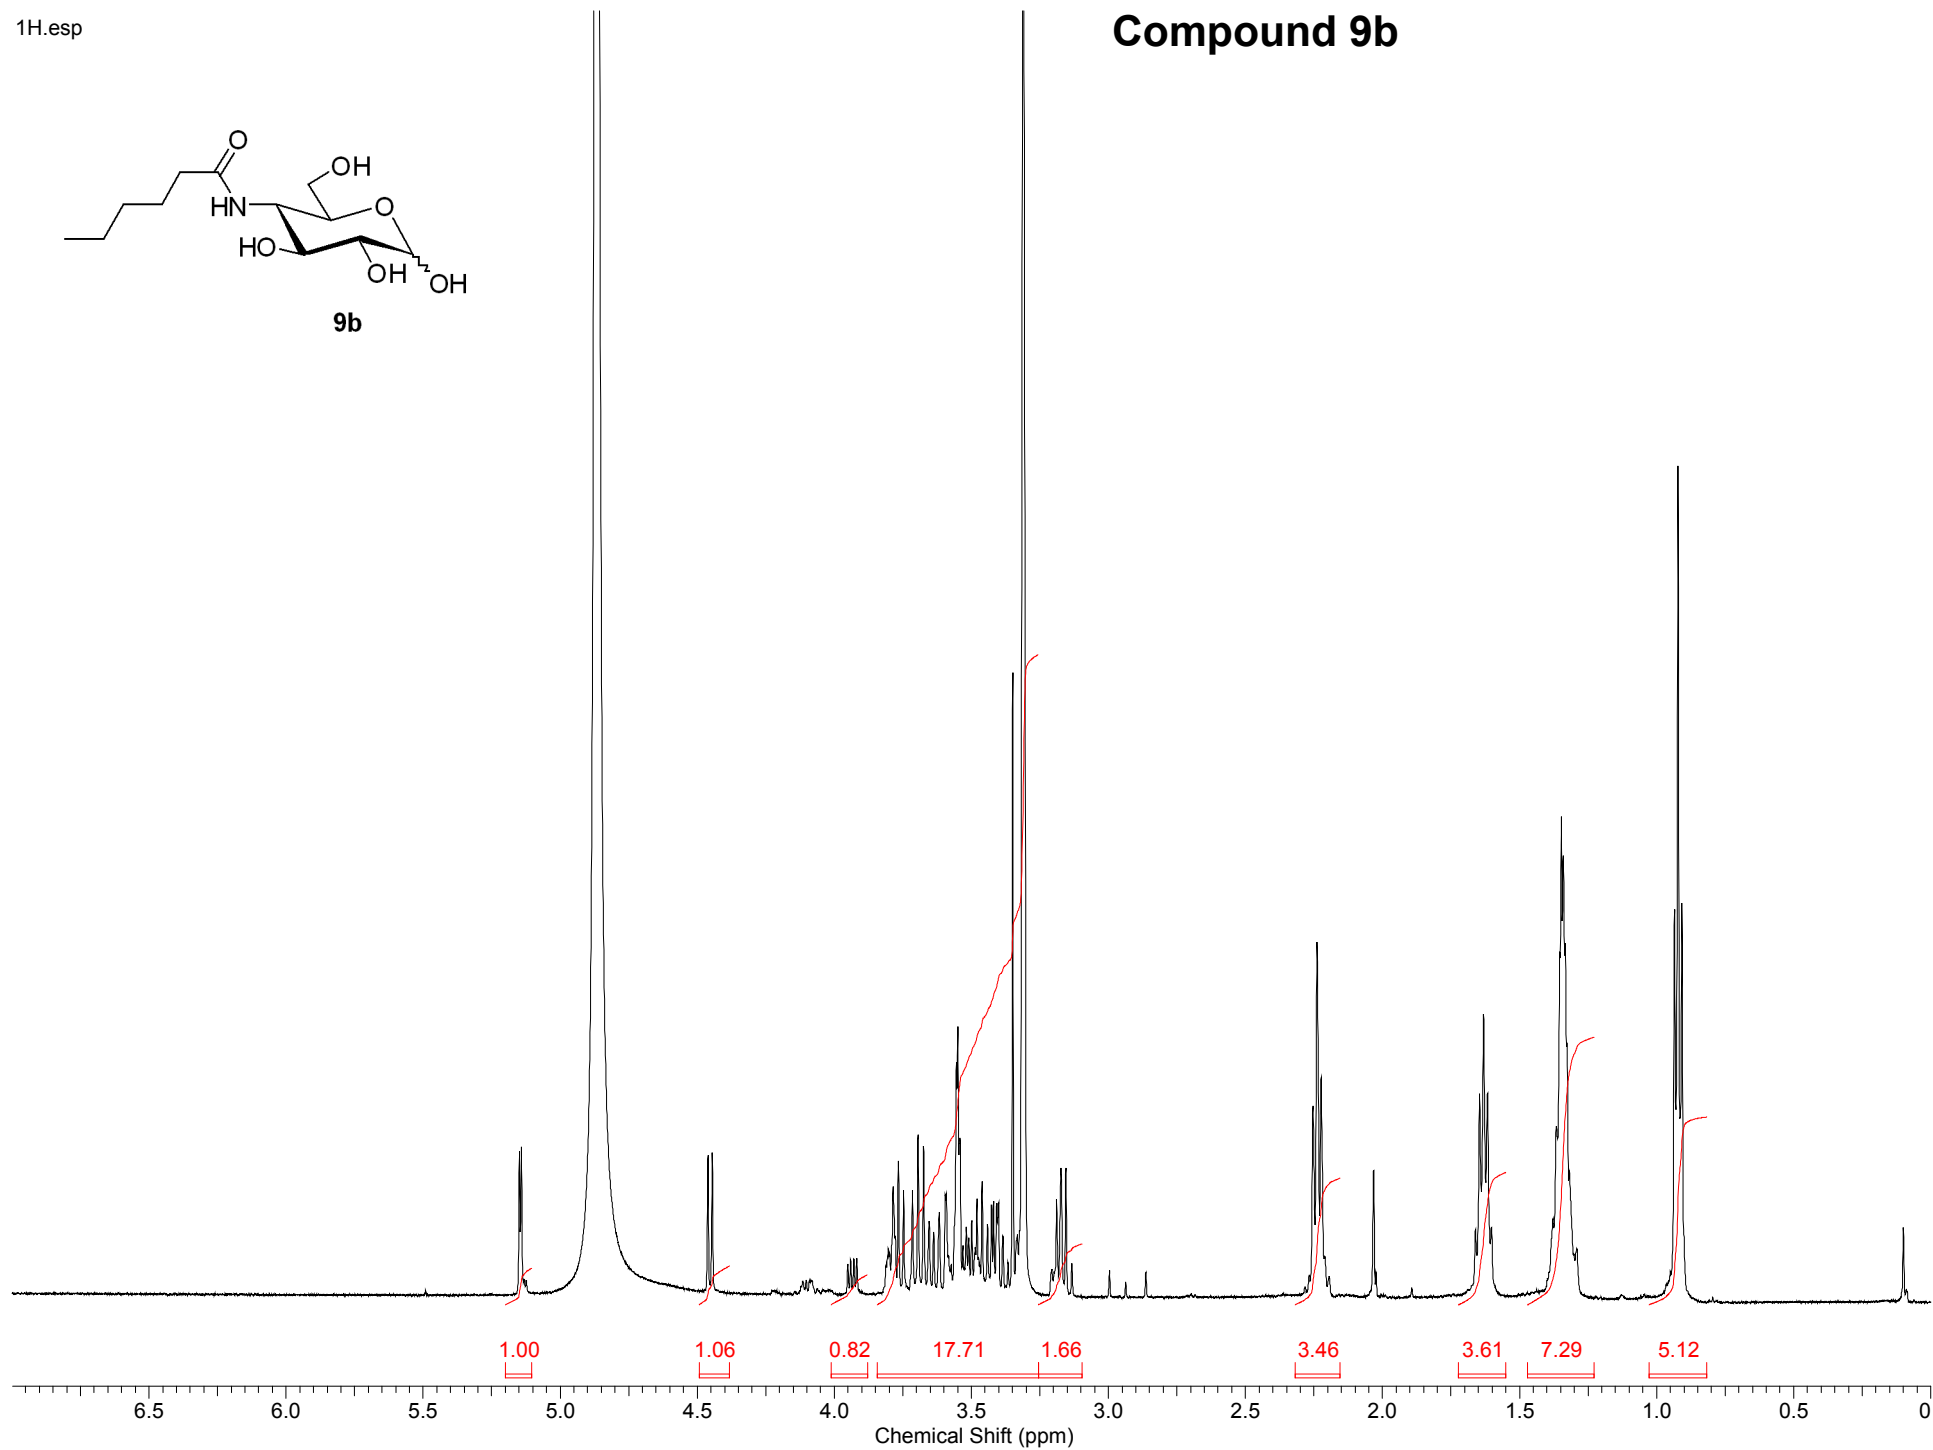

## Compound 9b

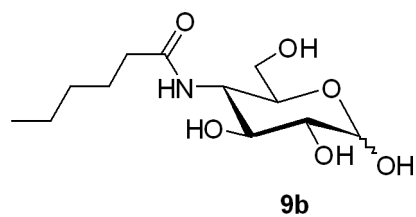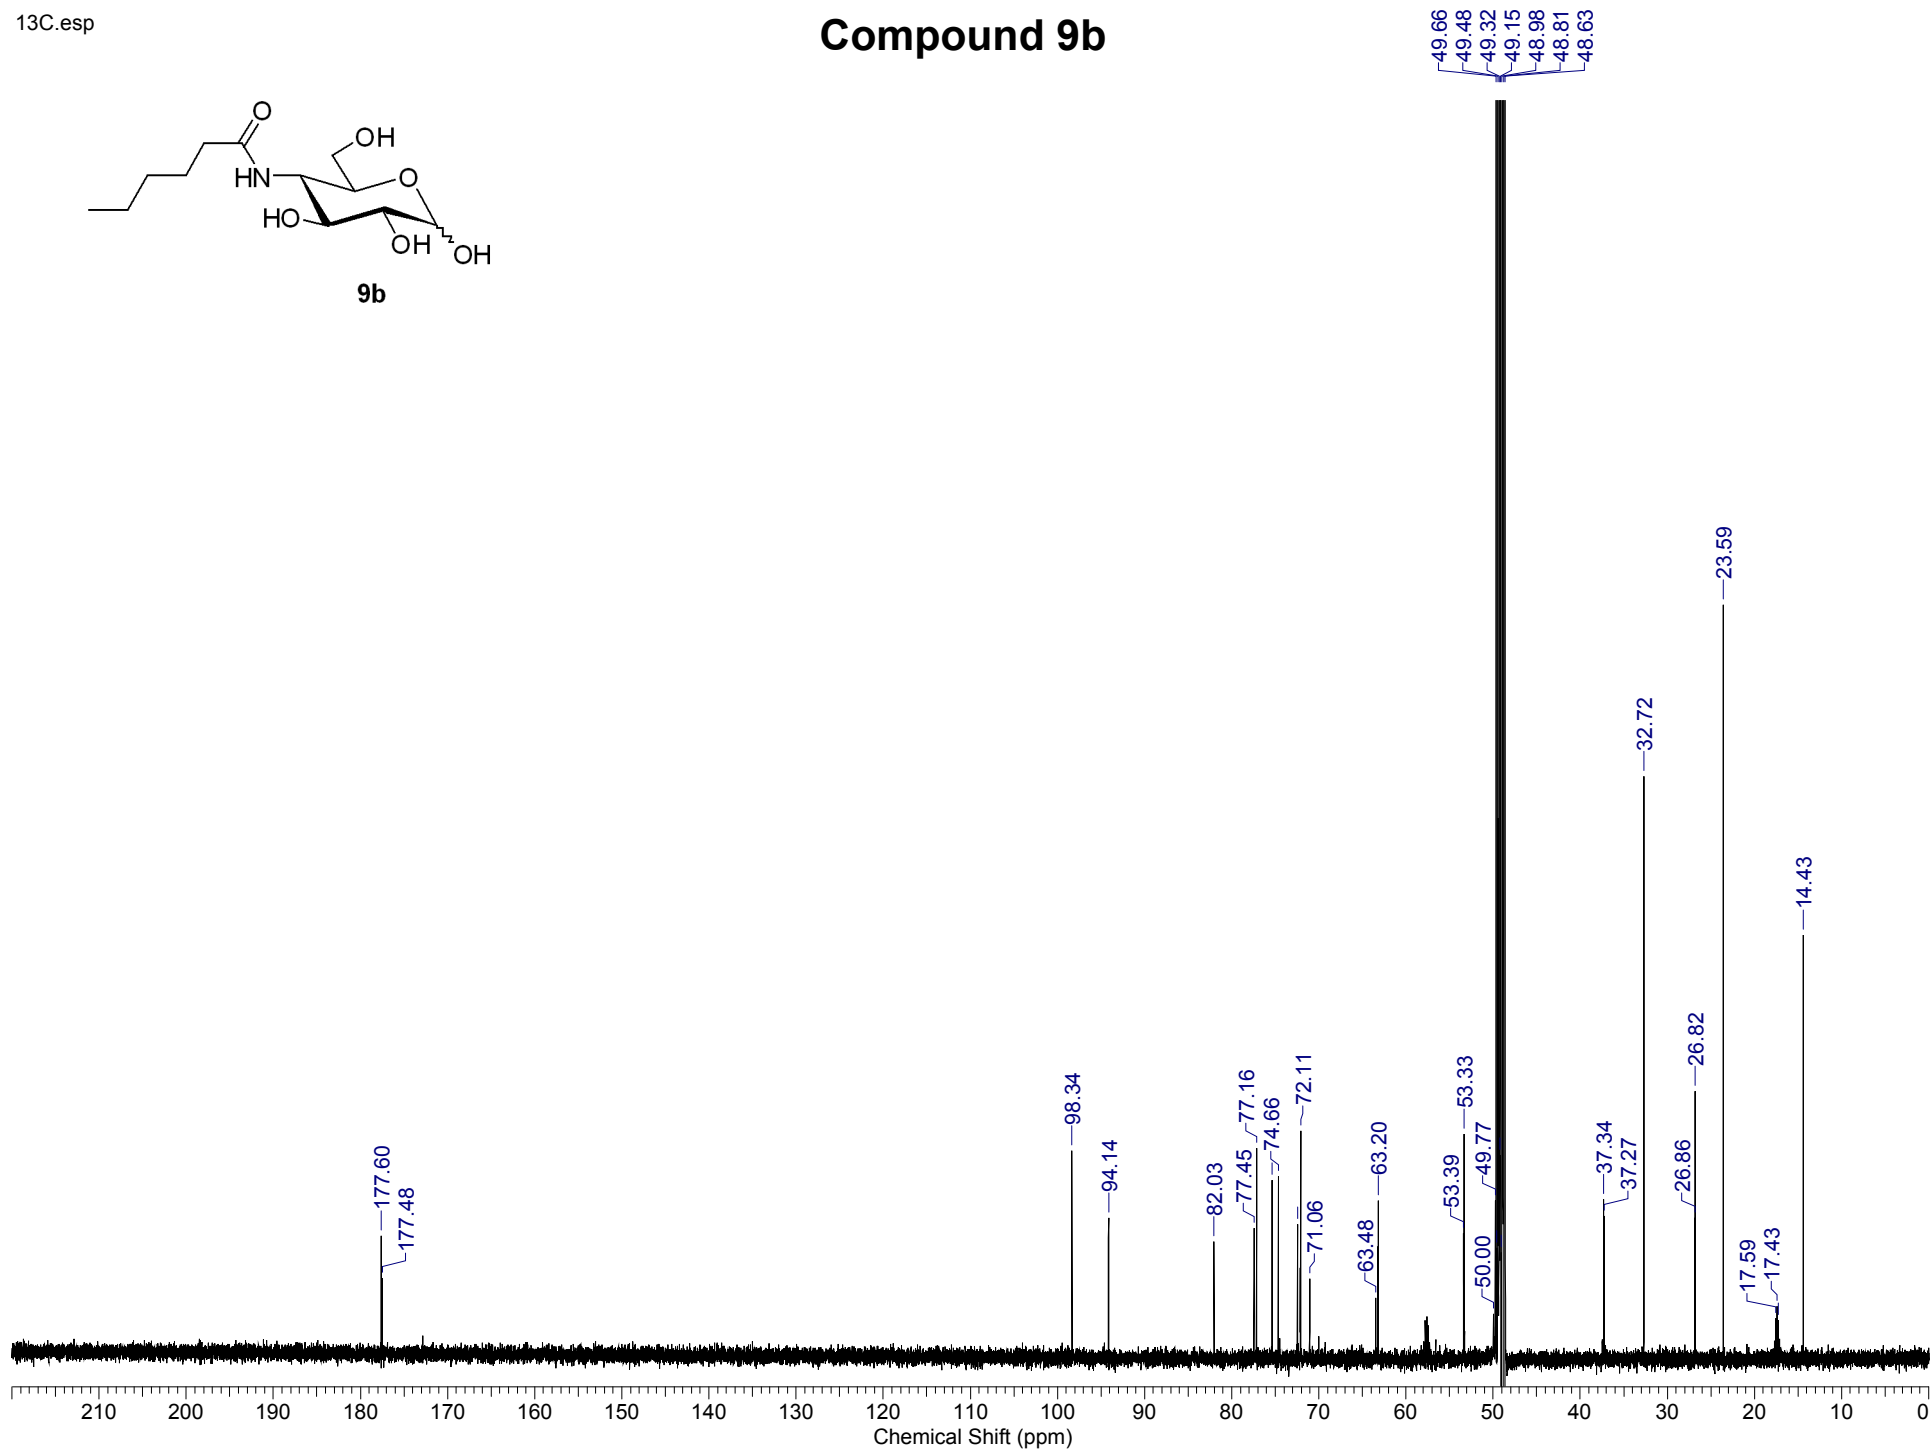

## Compound 9c

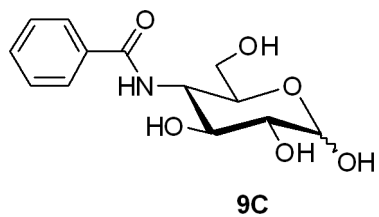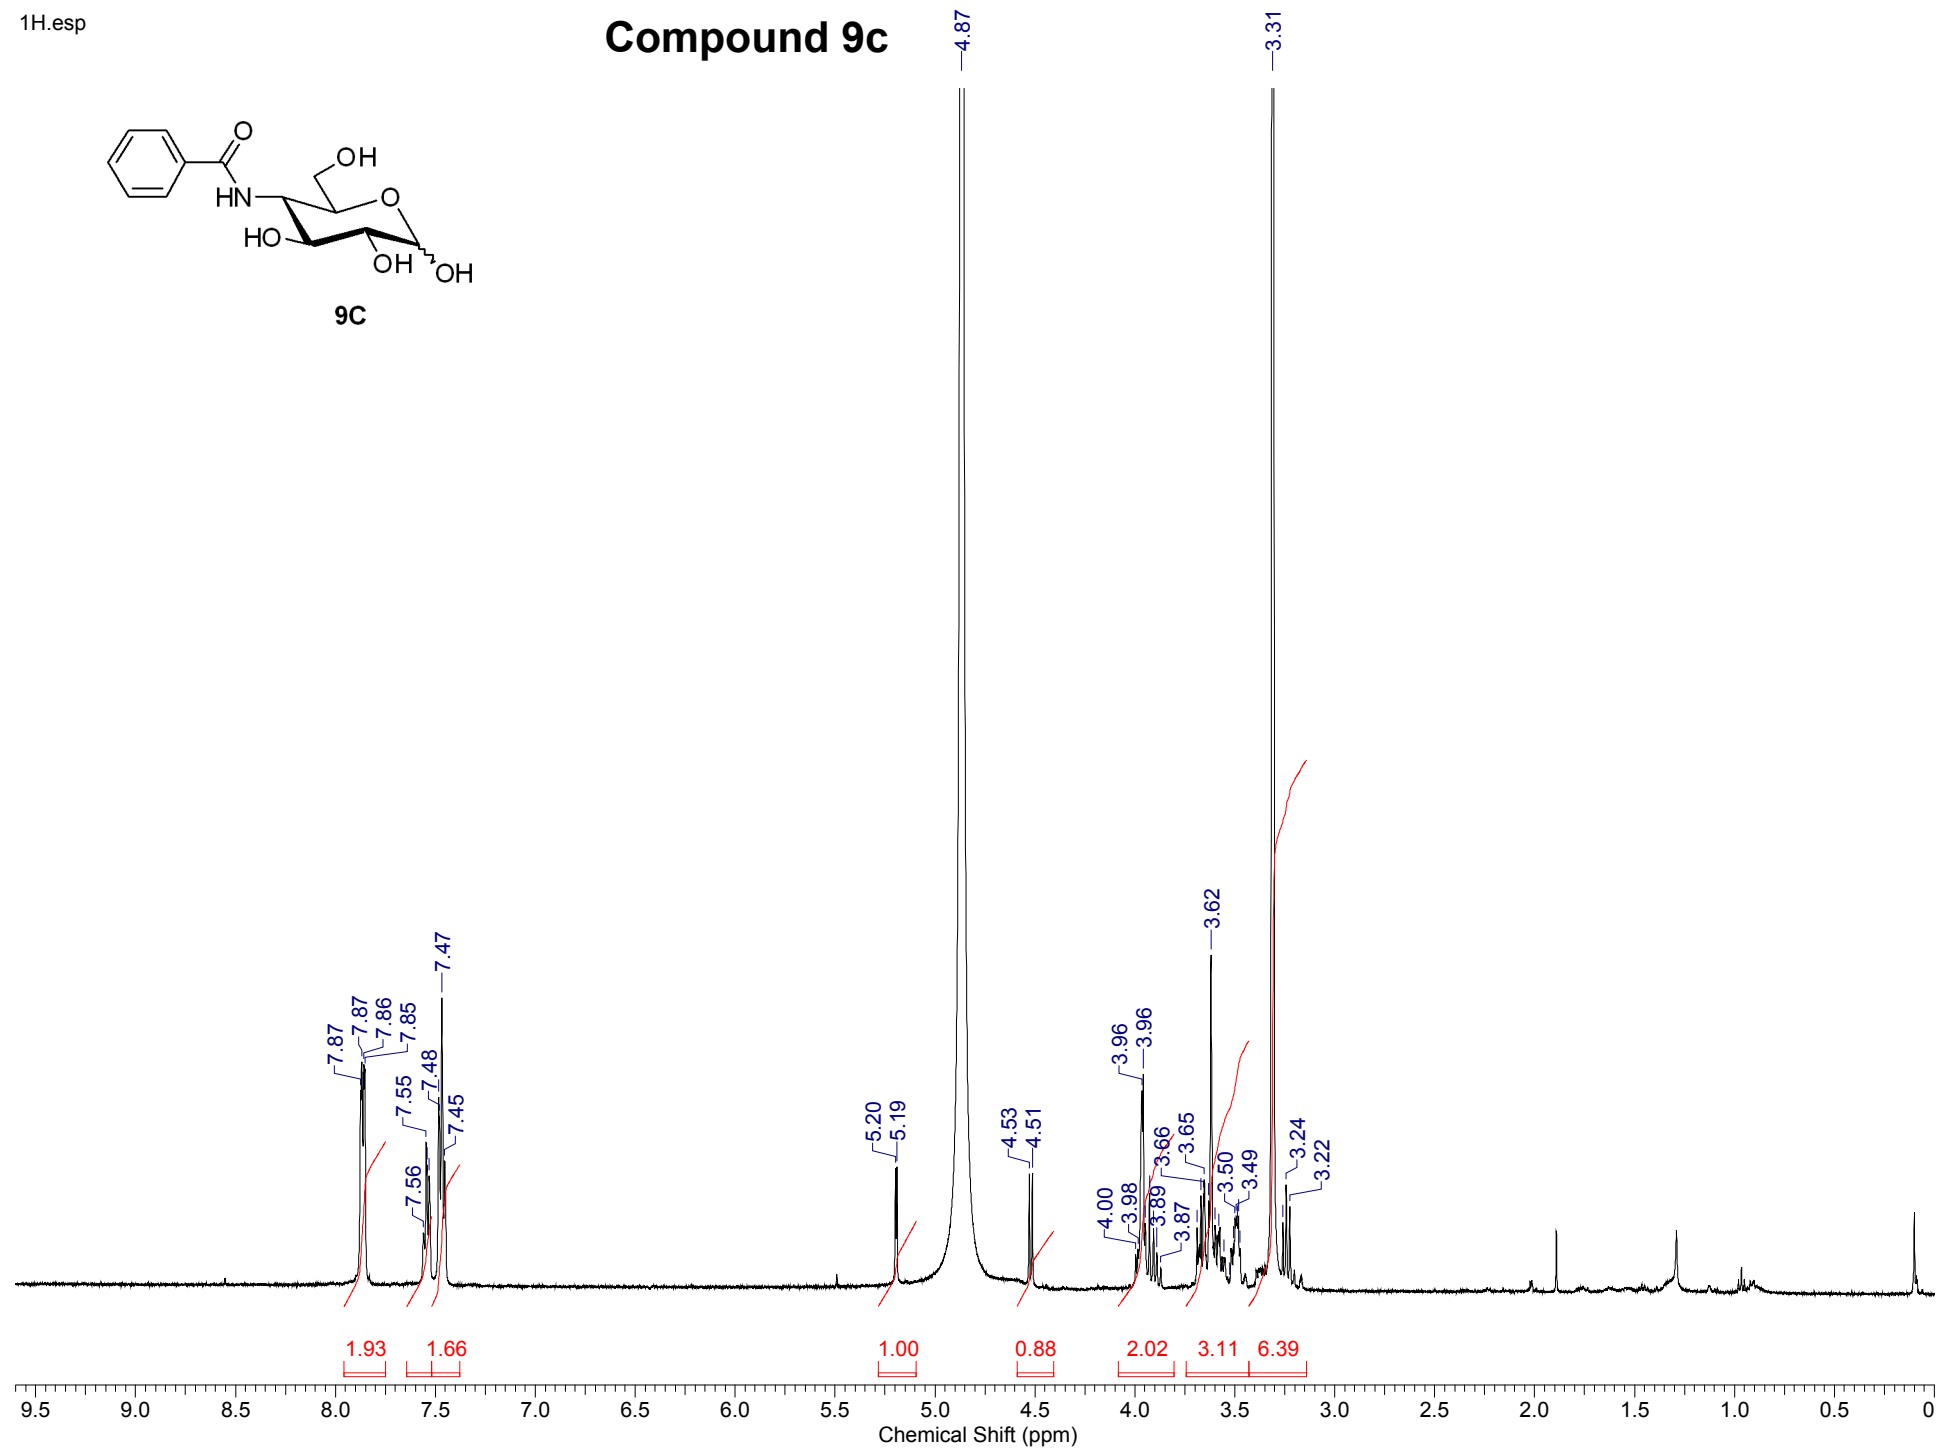

## Compound 9c

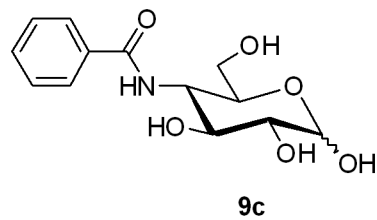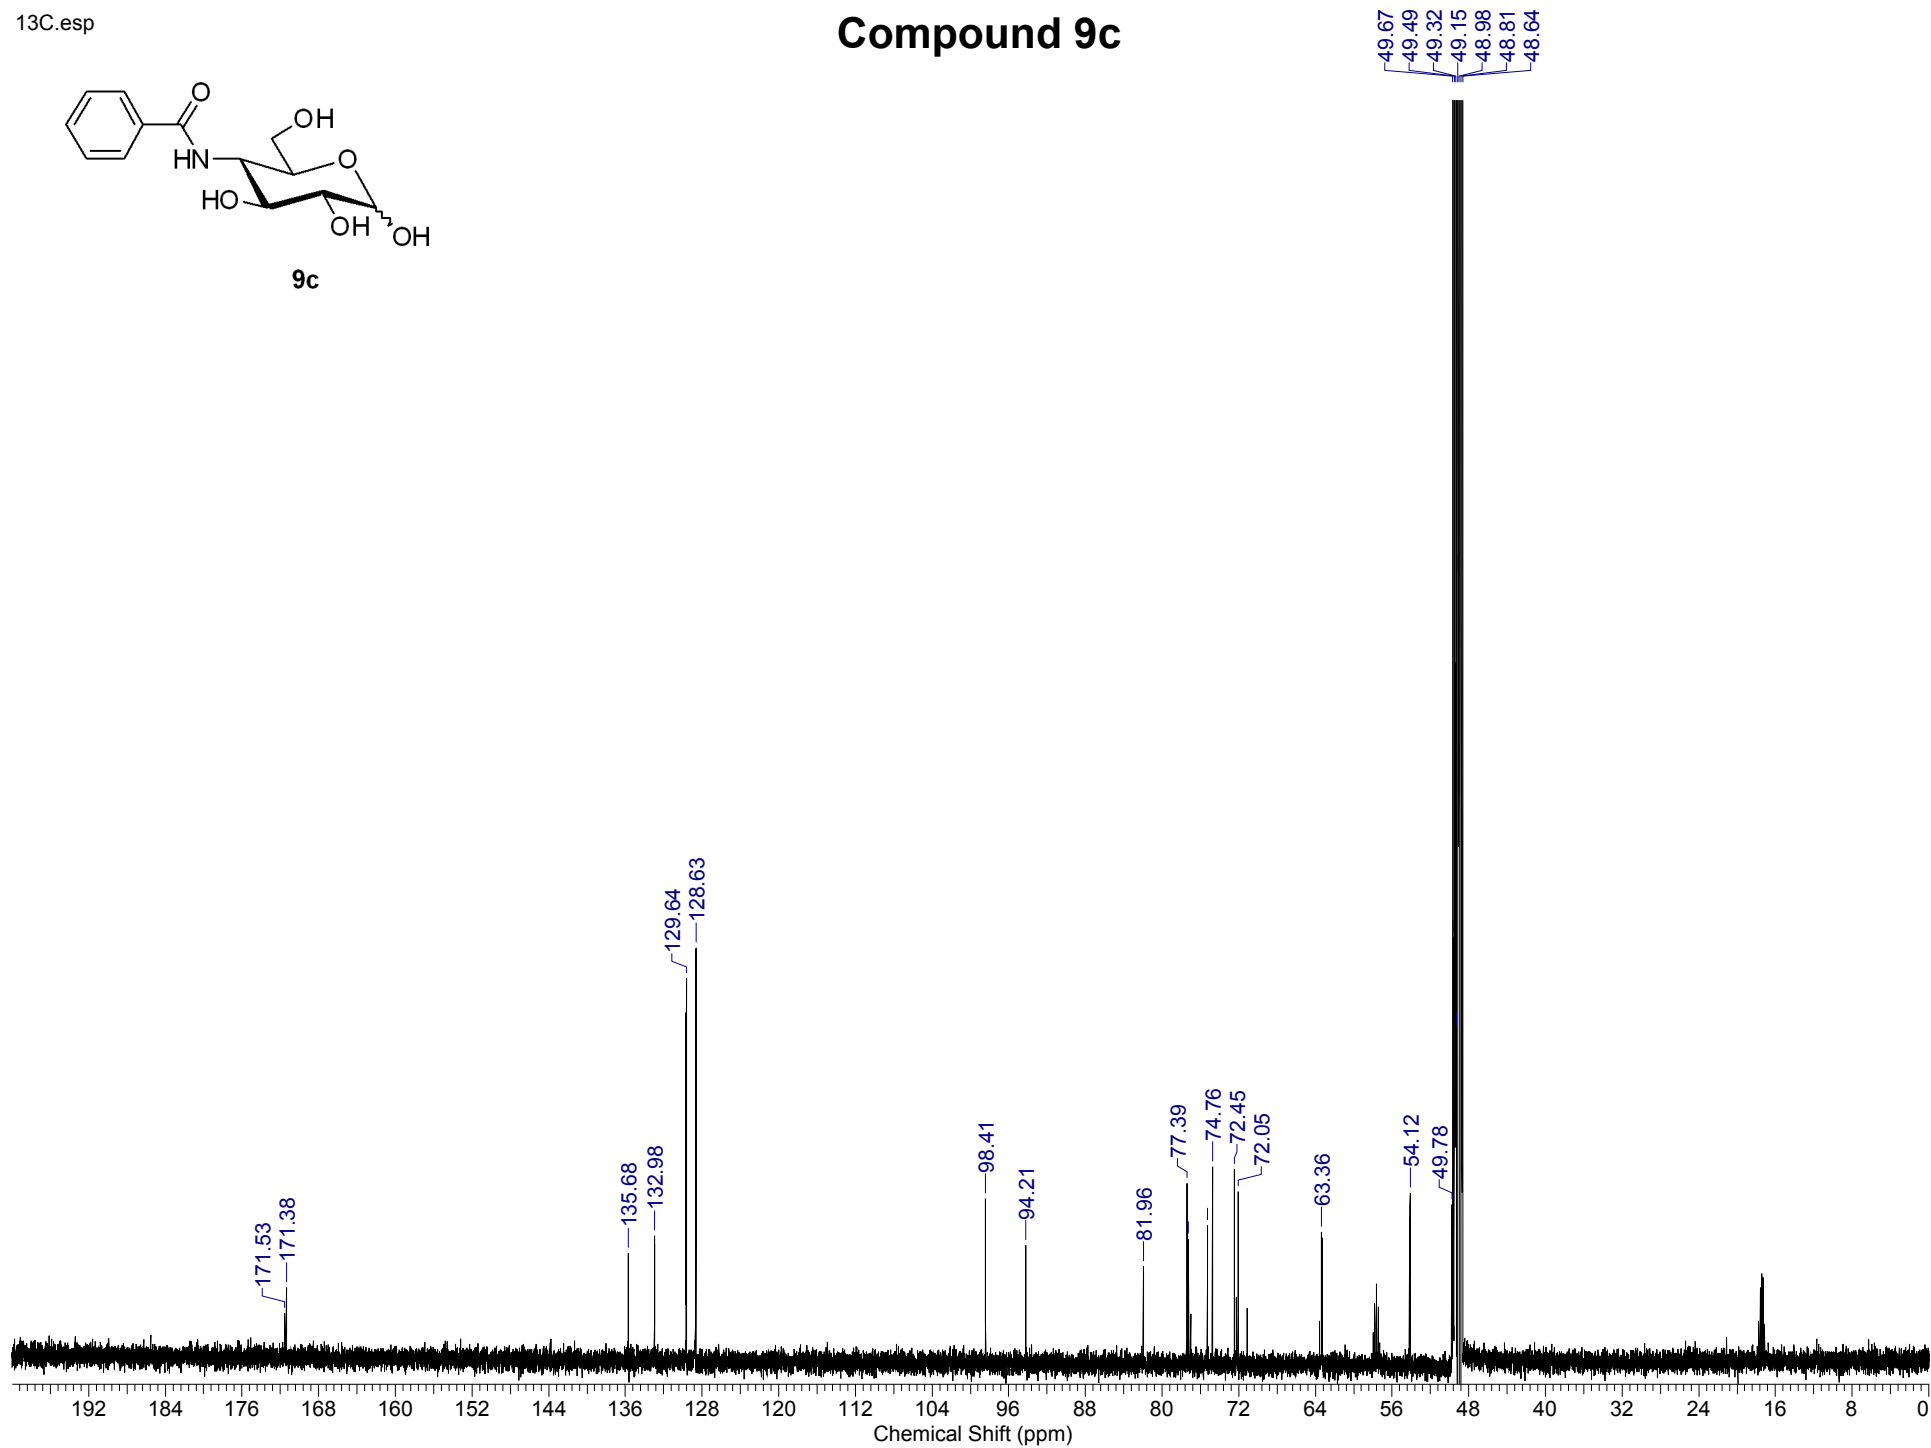

## Compound 9d

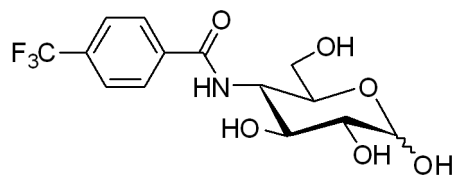

9d

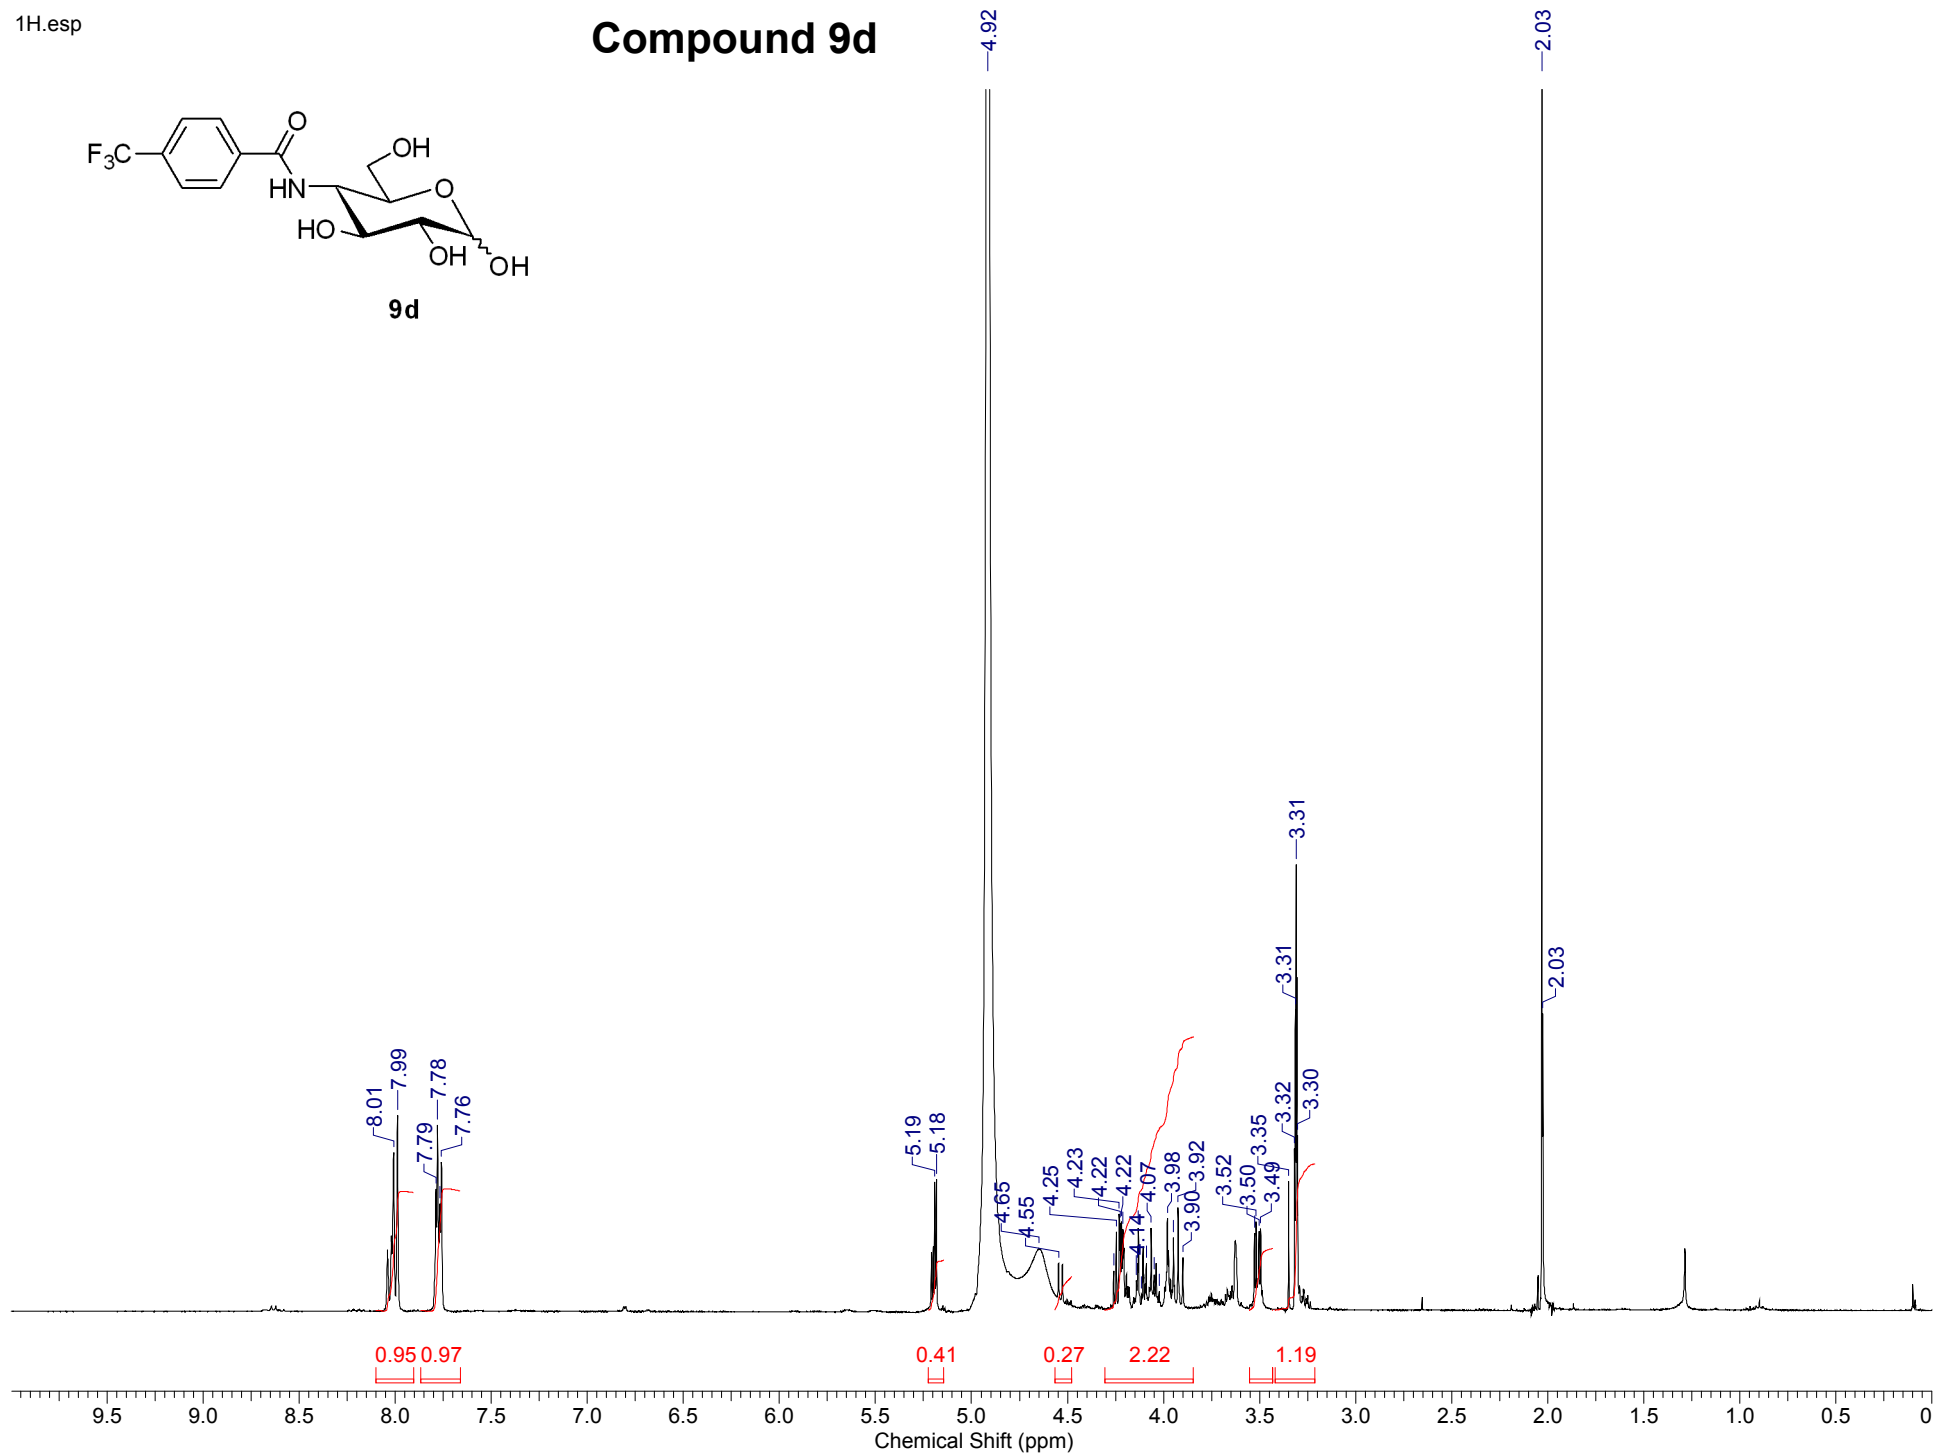



## Compound 9d

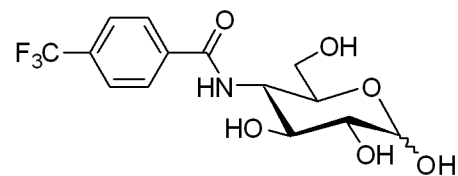

9d

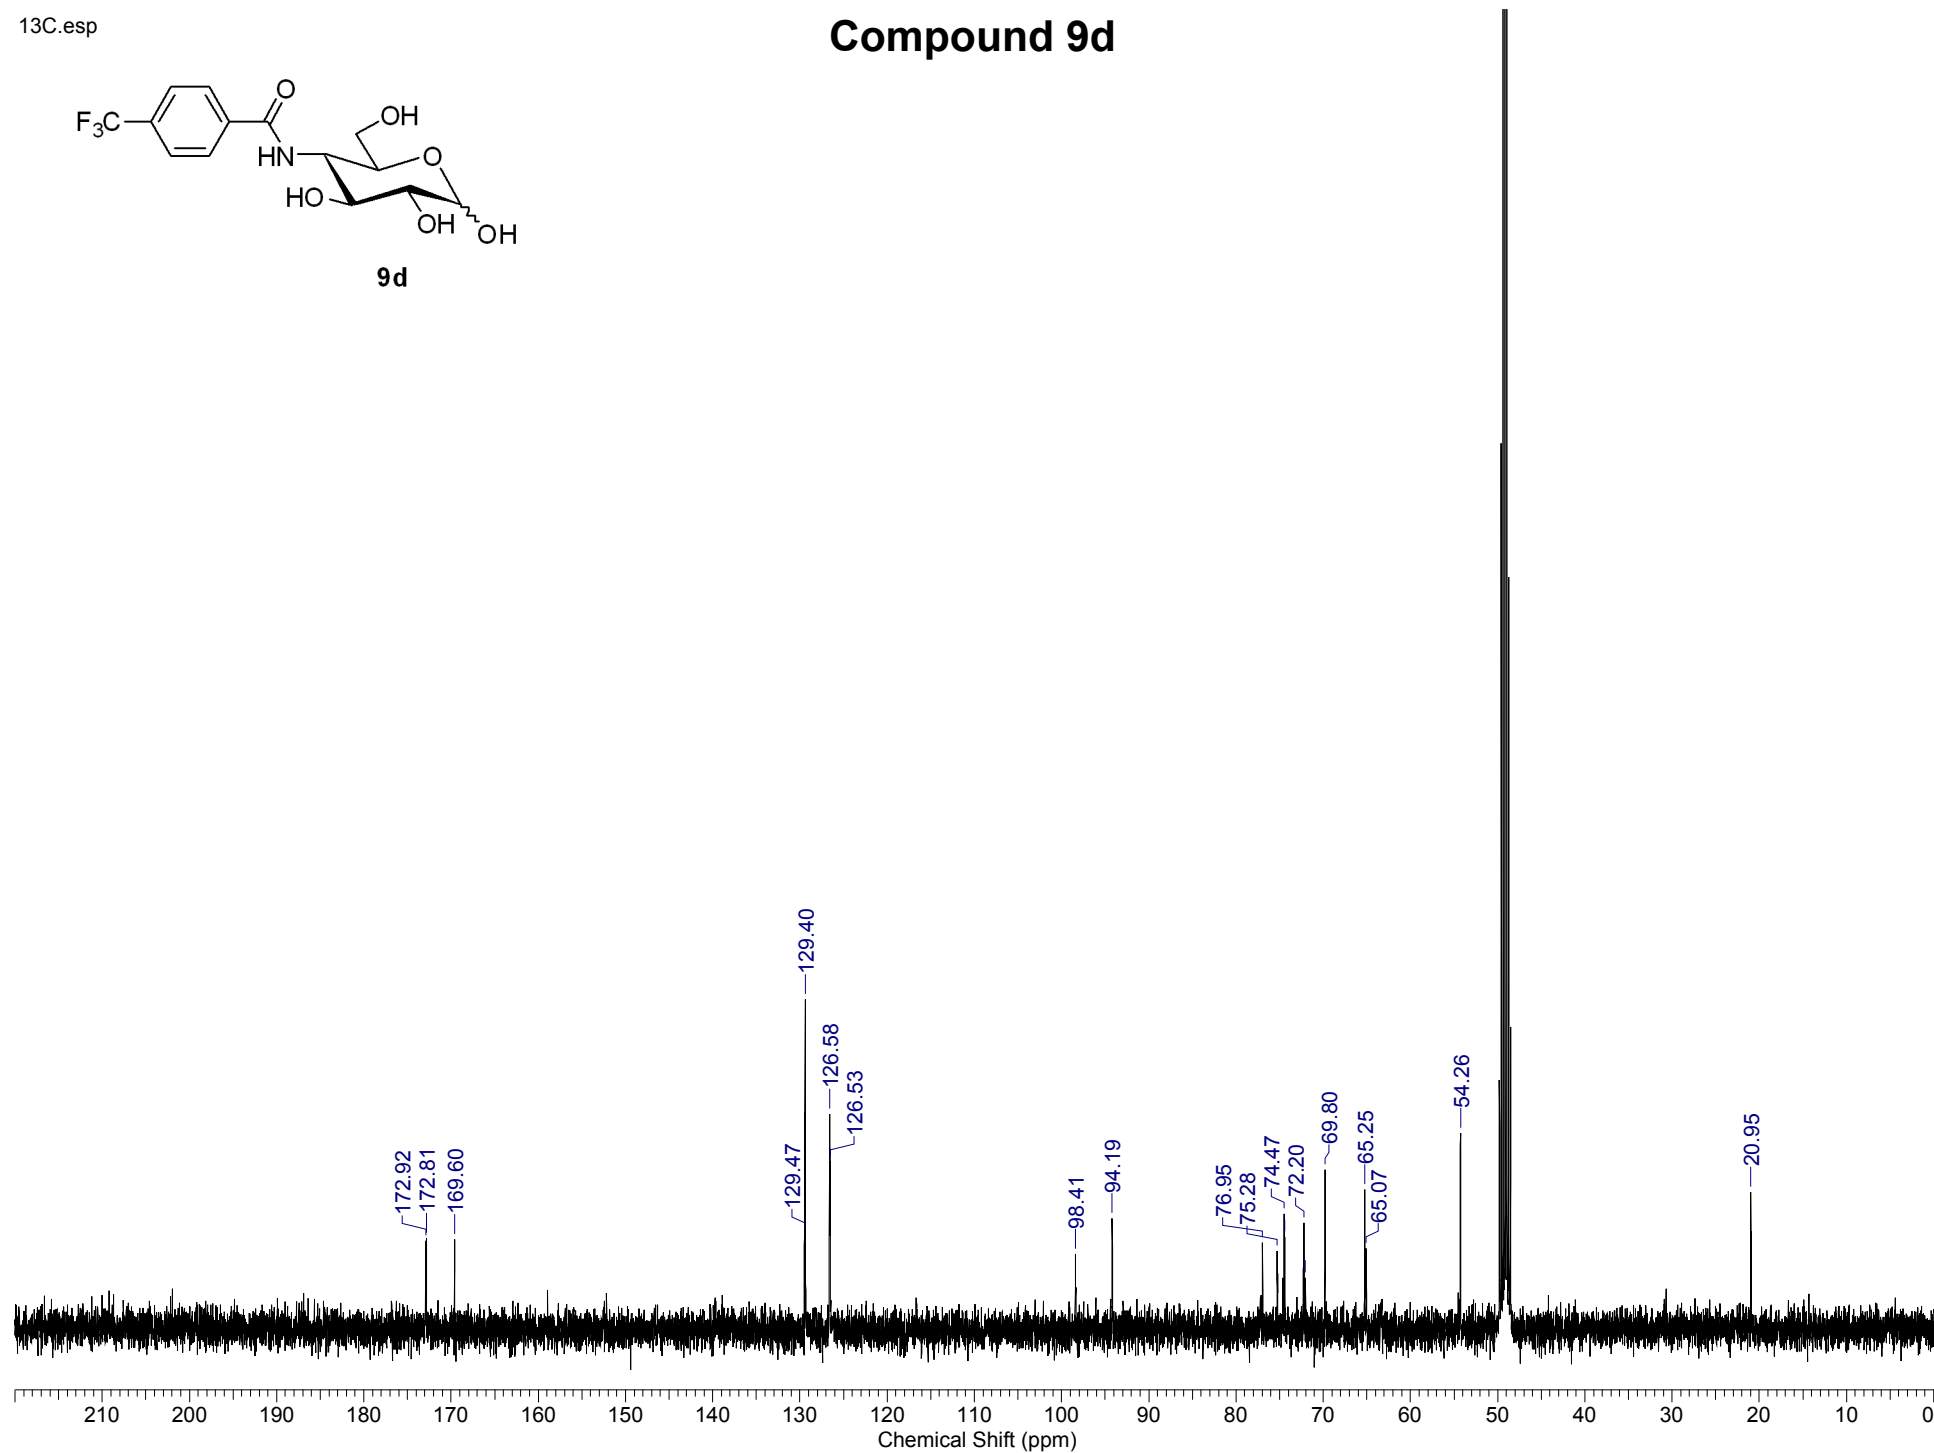

Supplement: b820830a.pdf [file b820830a.pdf]
